# Supplementary material for: MOPS-1.0: towards a model for the regulation of the global oceanic nitrogen budget by marine biogeochemical processes
Source: Copernicus journal article supplement (doi:10.5194/gmd-8-2929-2015), 2015-09-23
Supplement: Supplementary file 2 [file gmd-8-2929-2015-supplement.zip]

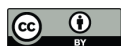

## *Supplement of*

# **MOPS-1.0: towards a model for the regulation of the global oceanic nitrogen budget by marine biogeochemical processes**

**I. Kriest and A. Oschlies**

*Correspondence to:* I. Kriest ([ikriest@geomar.de](mailto:ikriest@geomar.de))

- [gmd-8-2929-2015-supplement-title-page.pdf](#)
- [README.auxiliary\\_material](#)
- [README.changes\\_MOPS1.2\\_MOPS1.0](#)
- [auxiliary\\_plots.tar](#)

The copyright of individual parts of the supplement might differ from the CC-BY 3.0 licence.
