# Supplementary figures and images for: MOPS-1.0: towards a model for the regulation of the global oceanic nitrogen budget by marine biogeochemical processes
Source: Copernicus journal article supplement (doi:10.5194/gmd-8-2929-2015), 2015-09-23

# NFixNoTemp, O<sub>2</sub>, model – obs

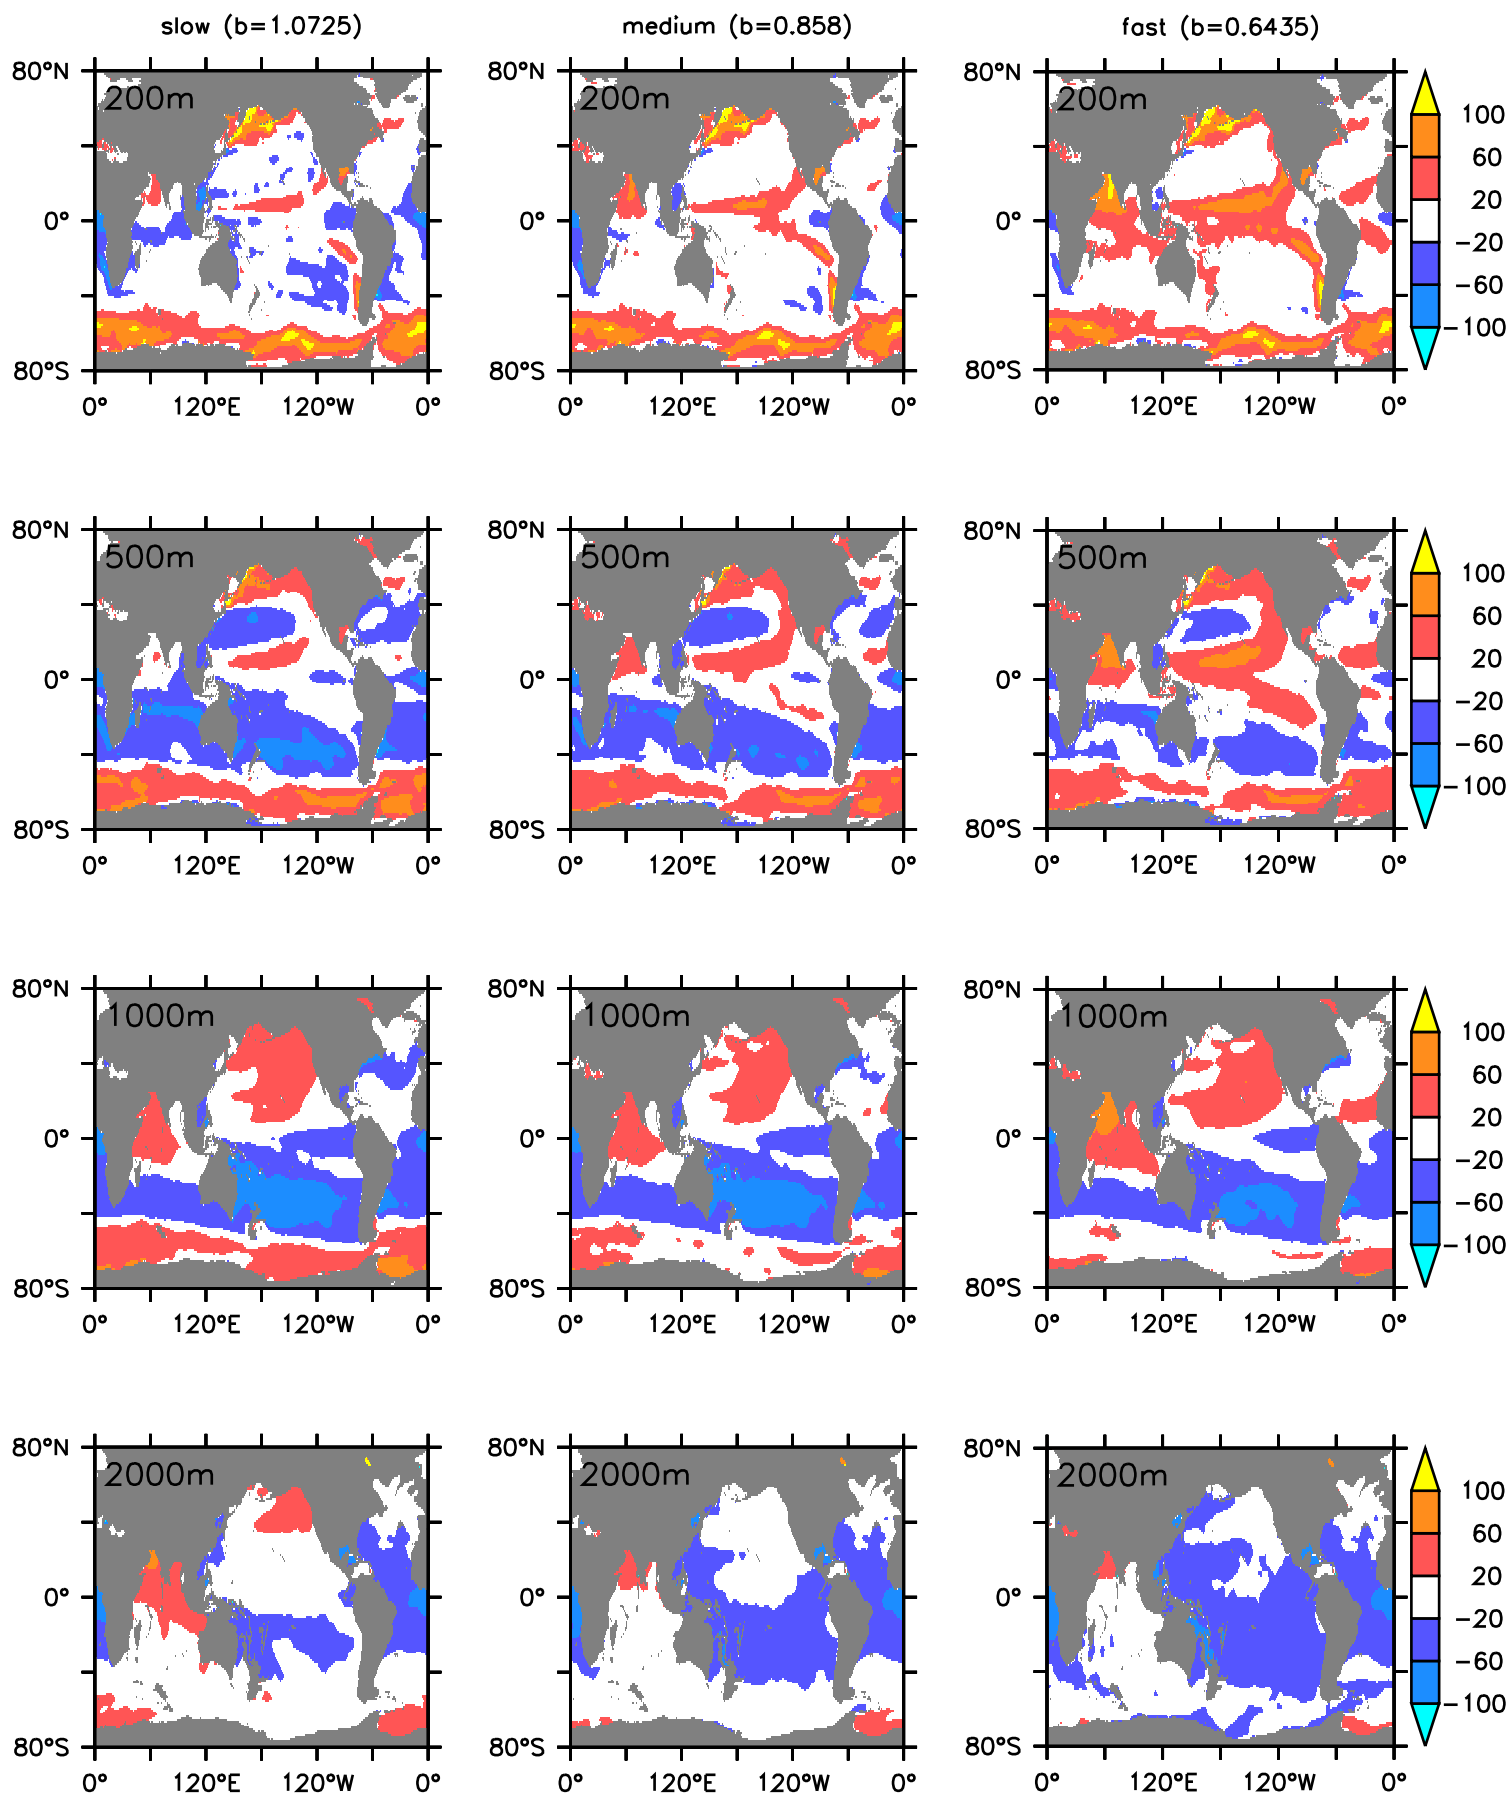

Supplement: Supplementary file 1 [file gmd-8-2929-2015-supplement.zip]

# RemHigh

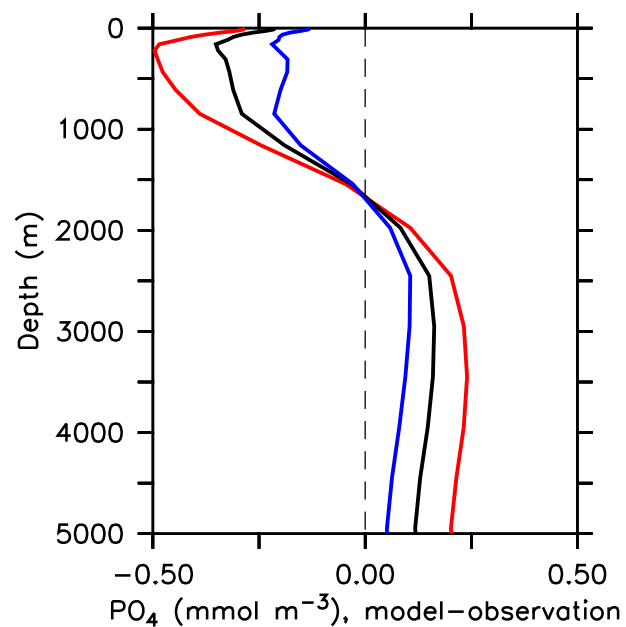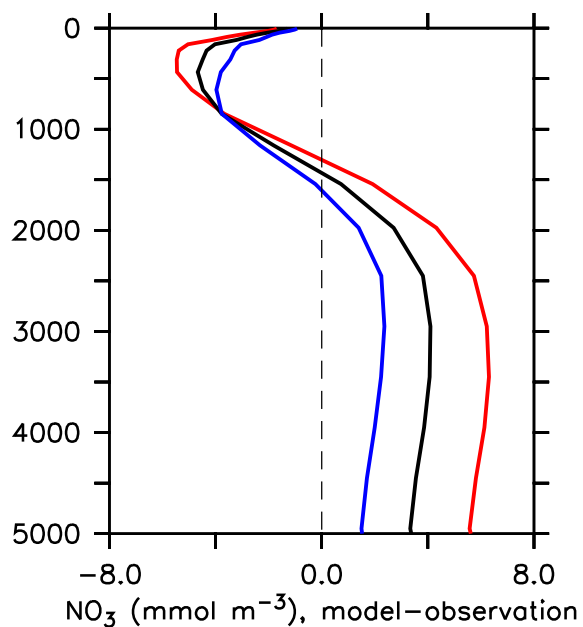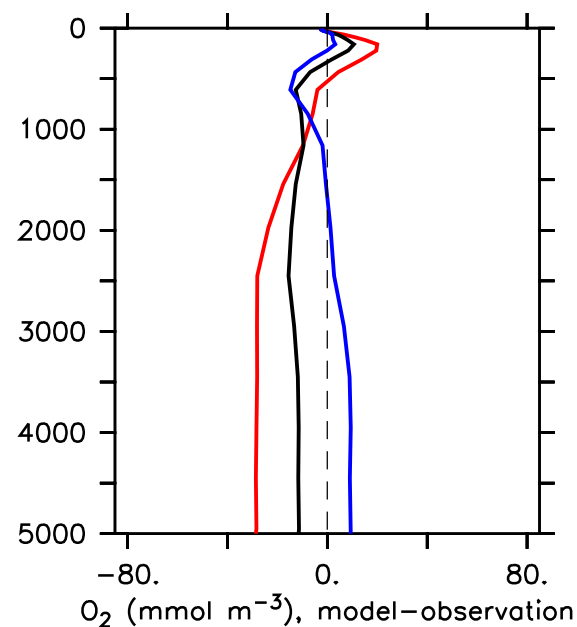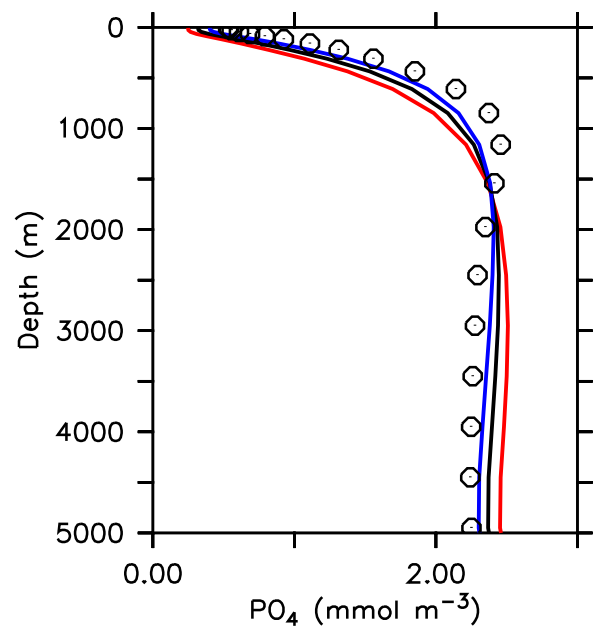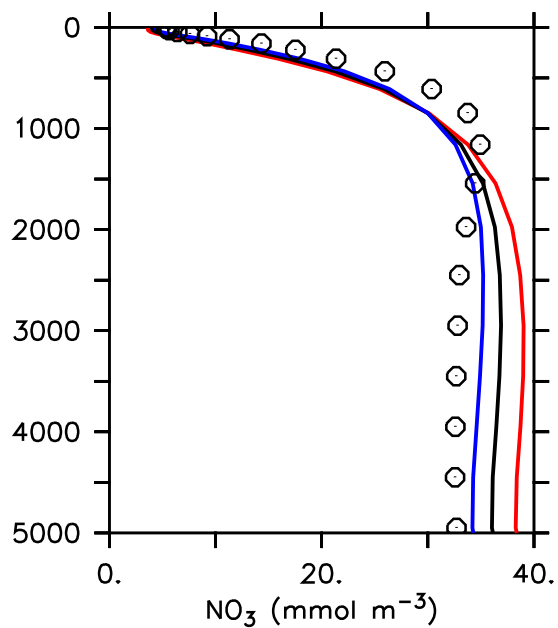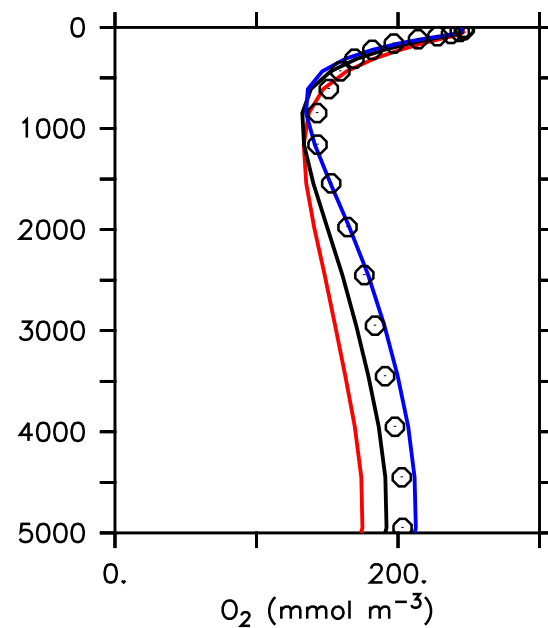

Supplement: Supplementary file 3 [file gmd-8-2929-2015-supplement.zip]

# NFixStoich, NO<sub>3</sub>, model – obs

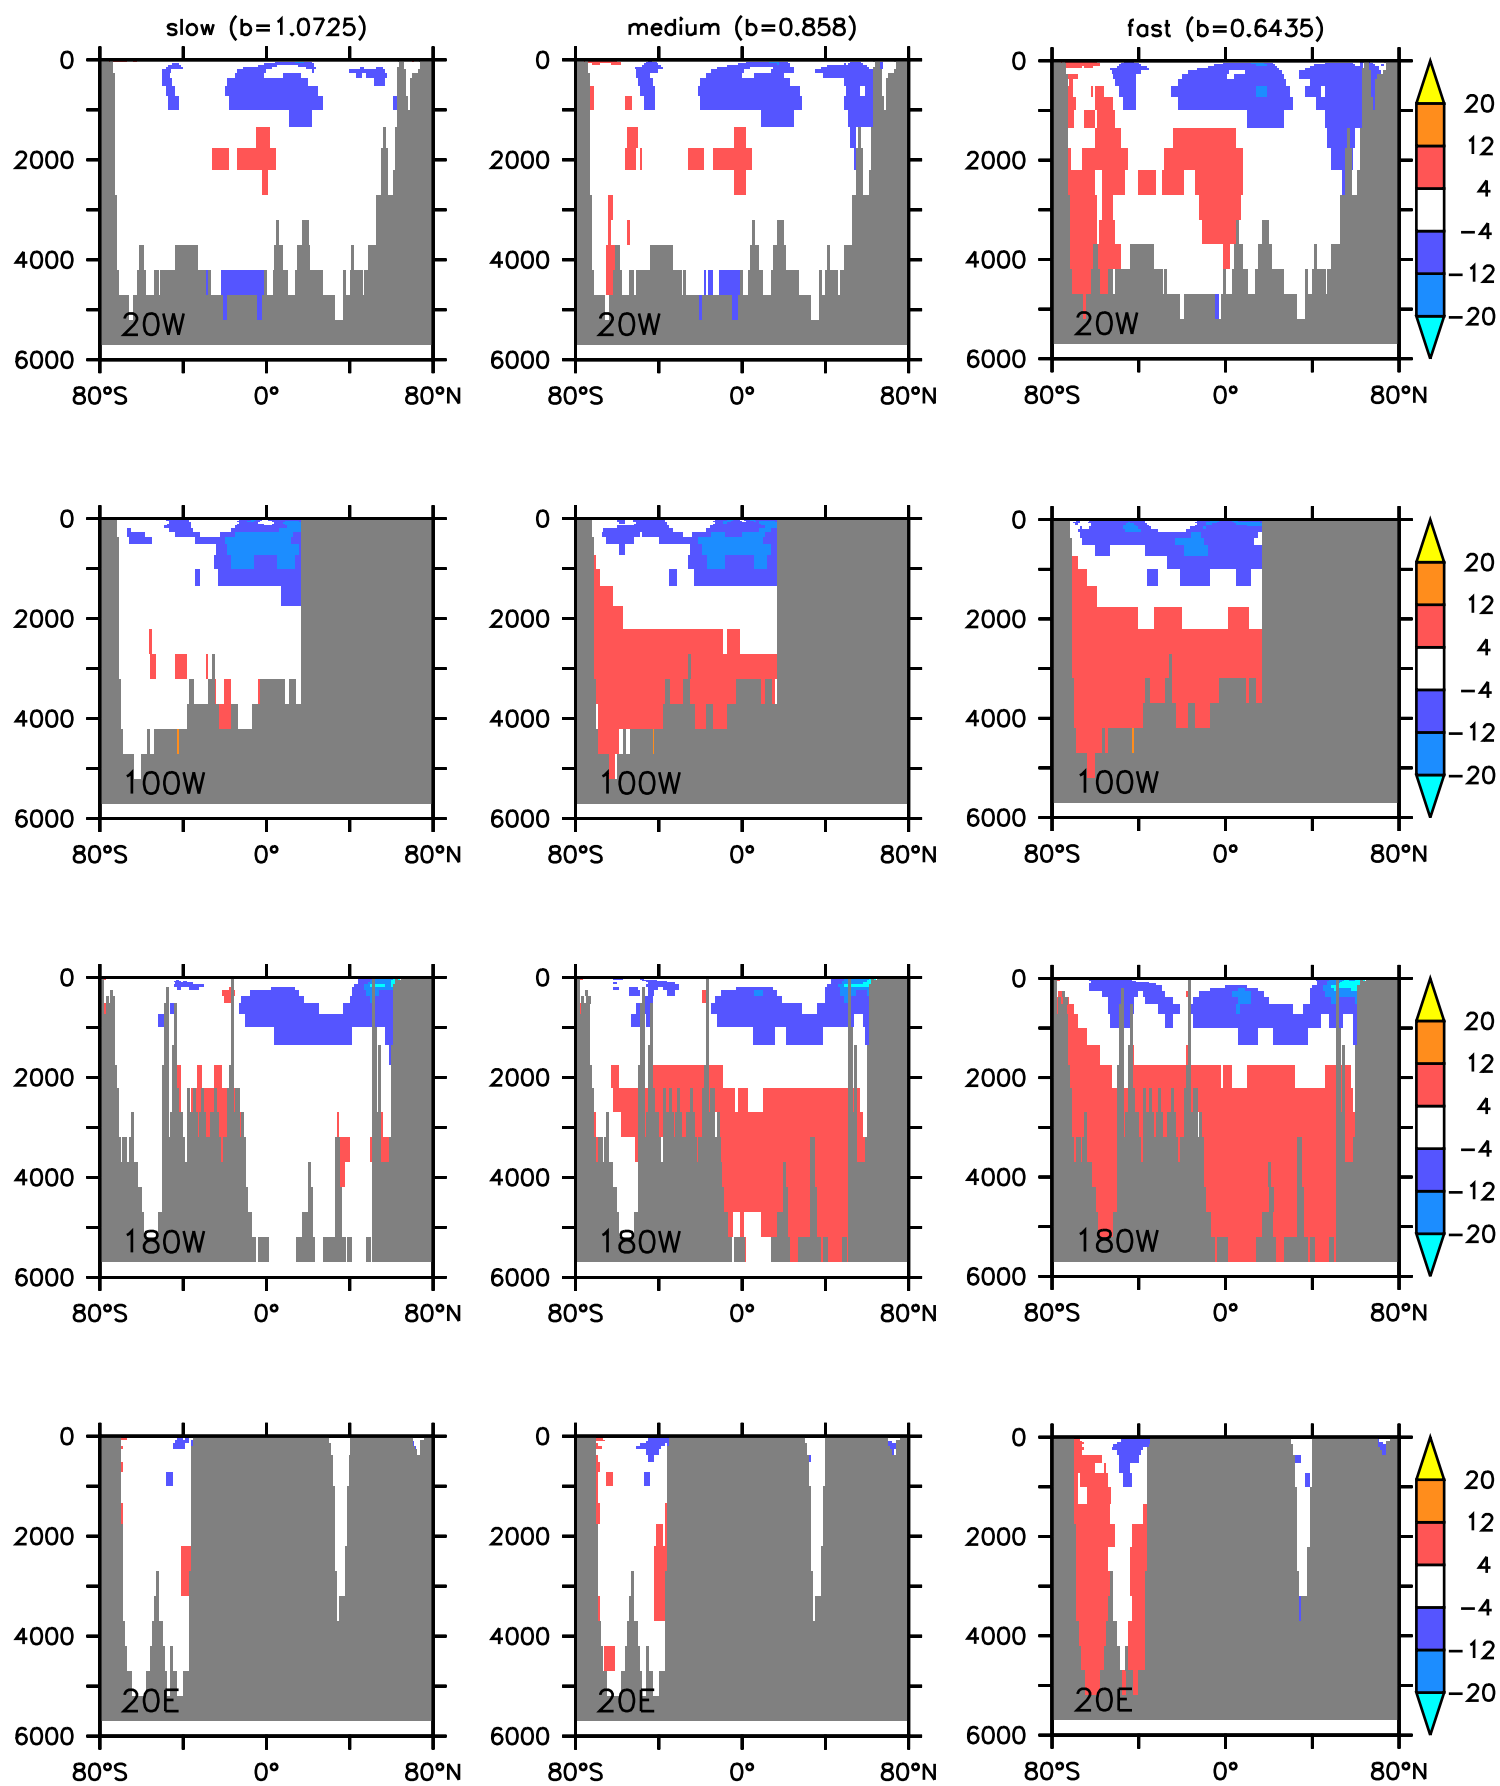

Supplement: Supplementary file 4 [file gmd-8-2929-2015-supplement.zip]

# DenHigh

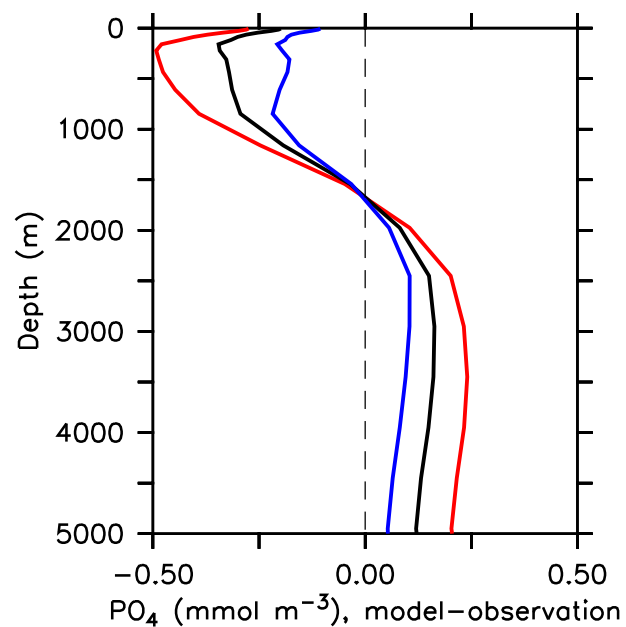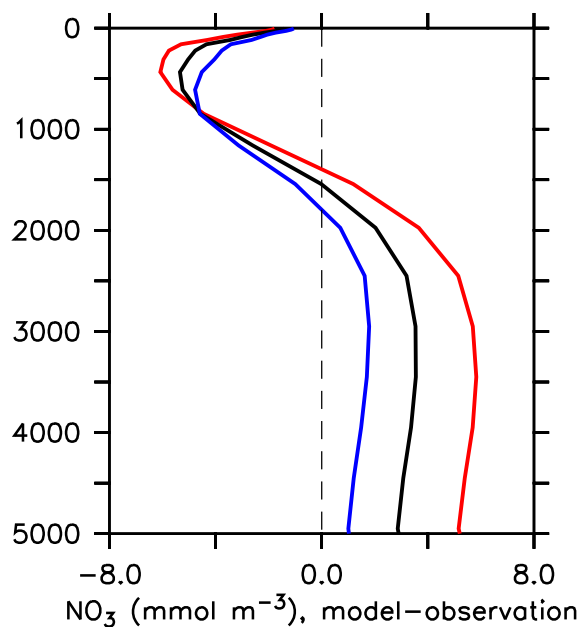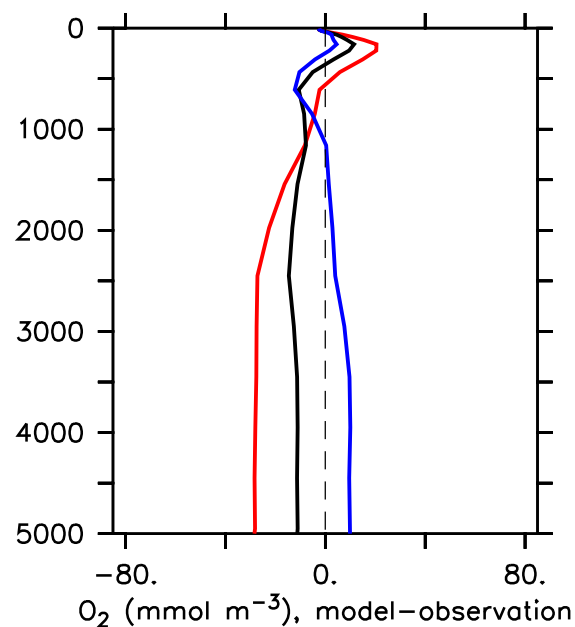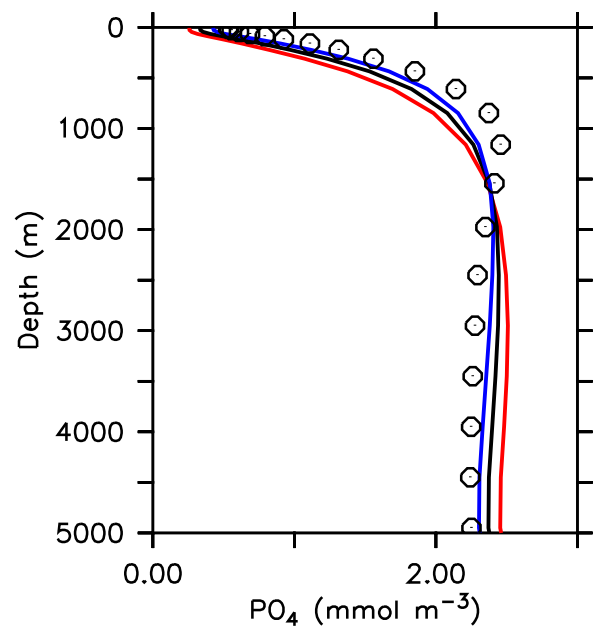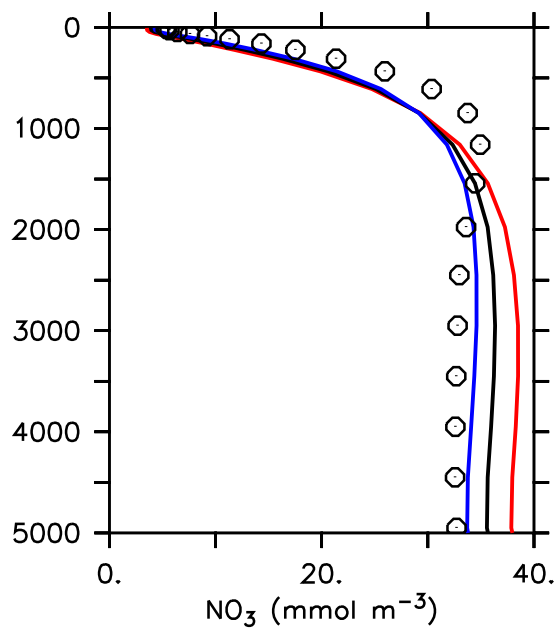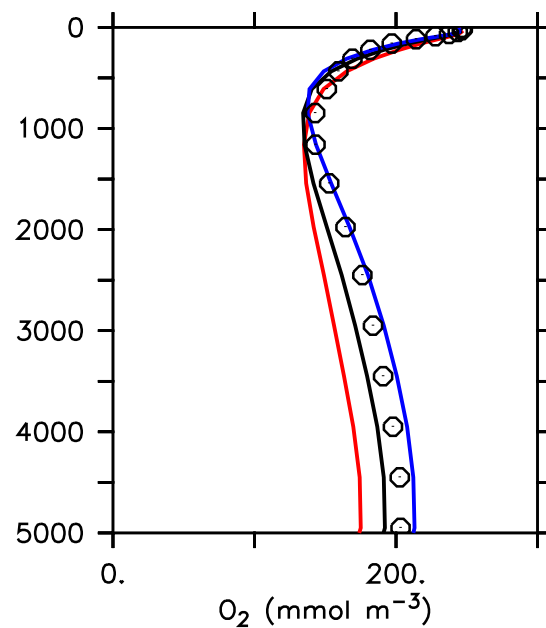

Supplement: Supplementary file 5 [file gmd-8-2929-2015-supplement.zip]

DenHigh, NO<sub>3</sub>, model – obs

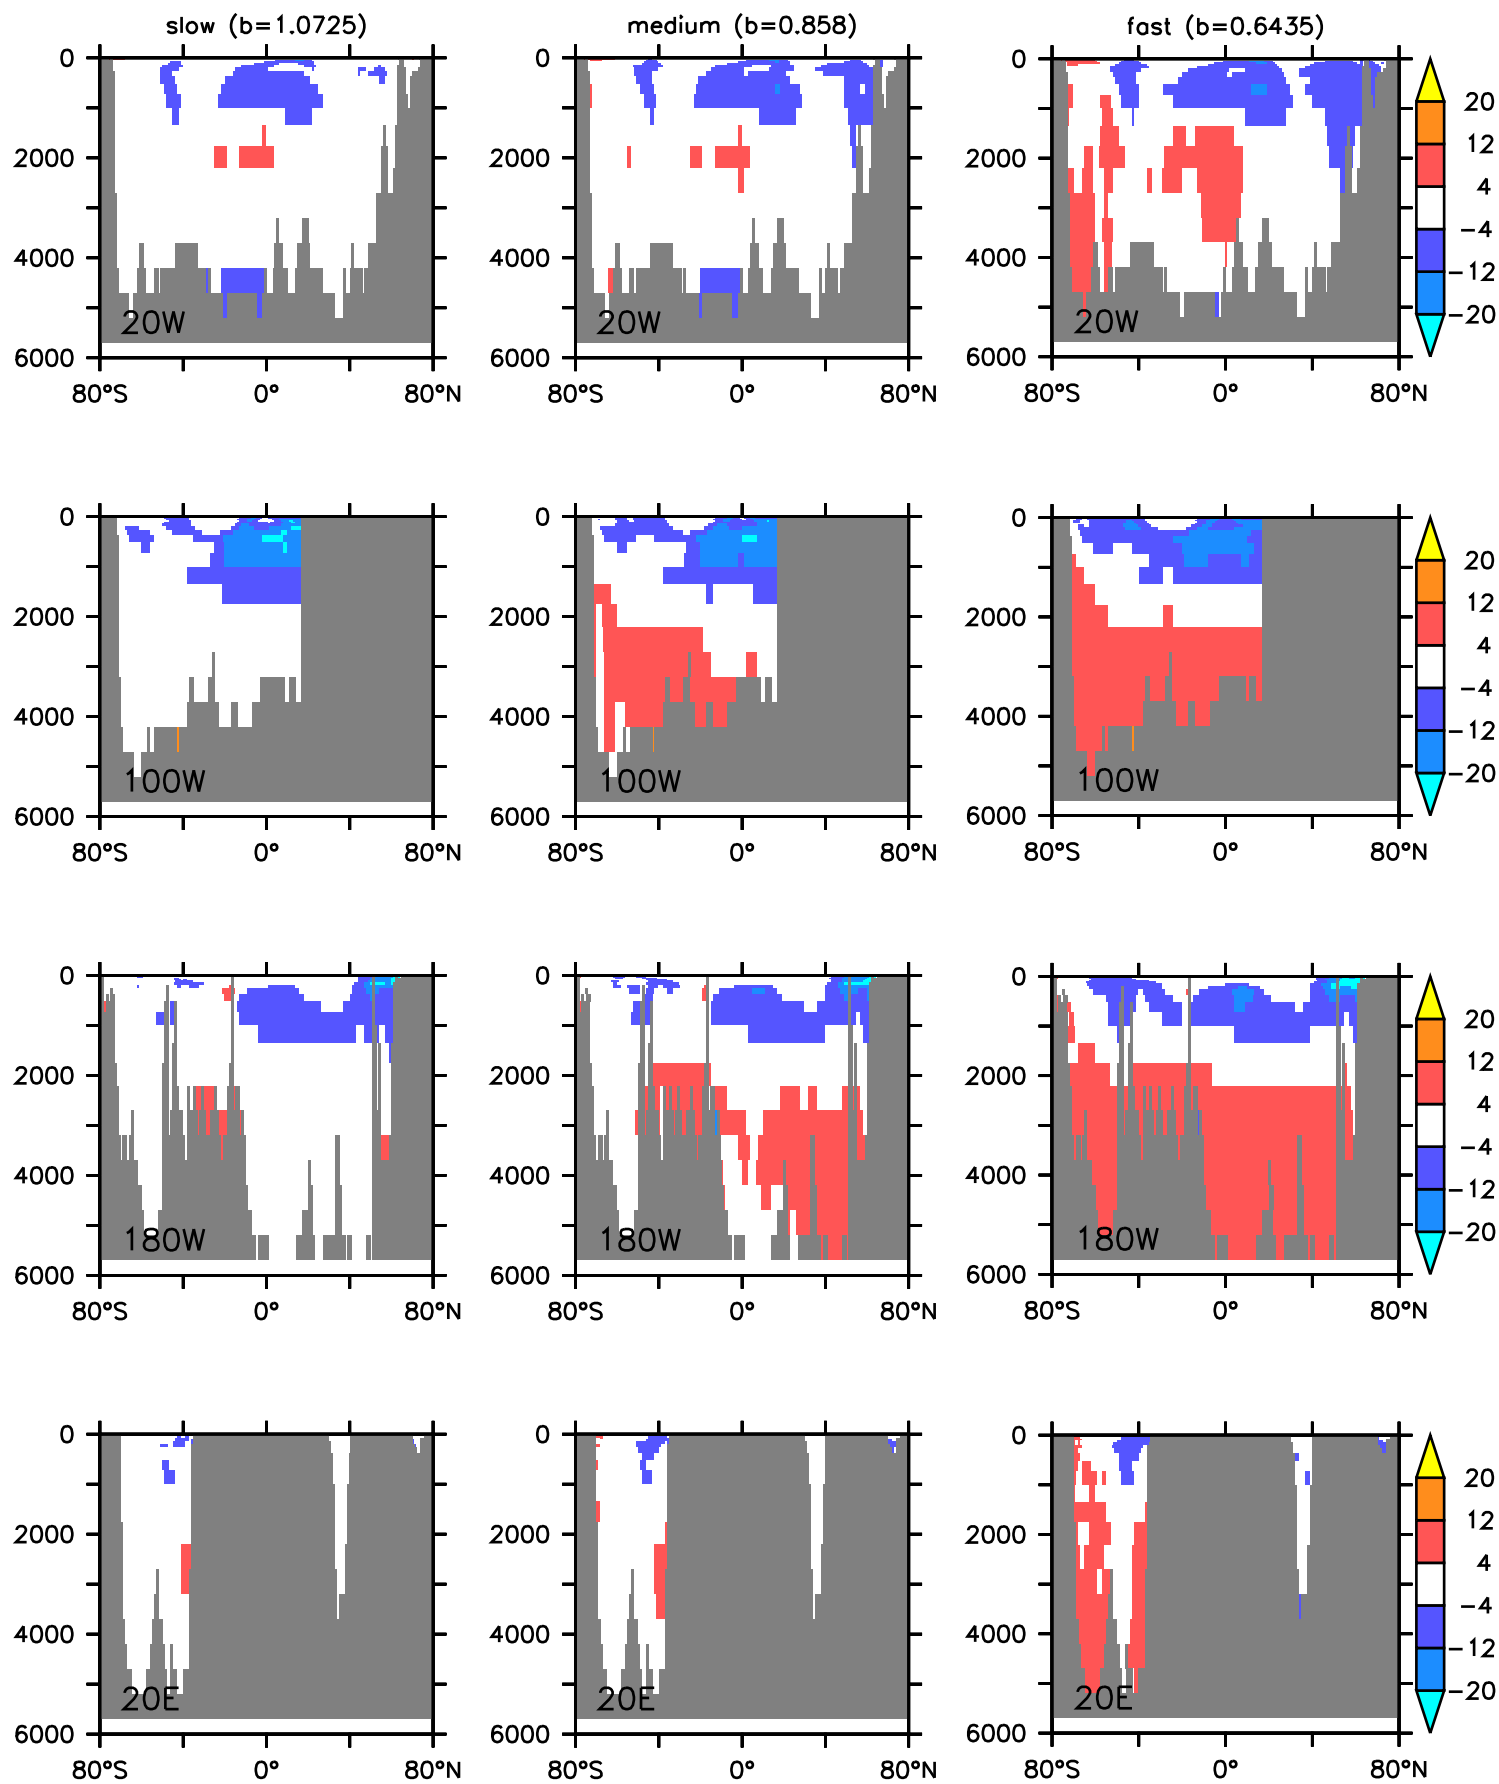

Supplement: Supplementary file 6 [file gmd-8-2929-2015-supplement.zip]

DenHigh, NO<sub>3</sub>, model – obs

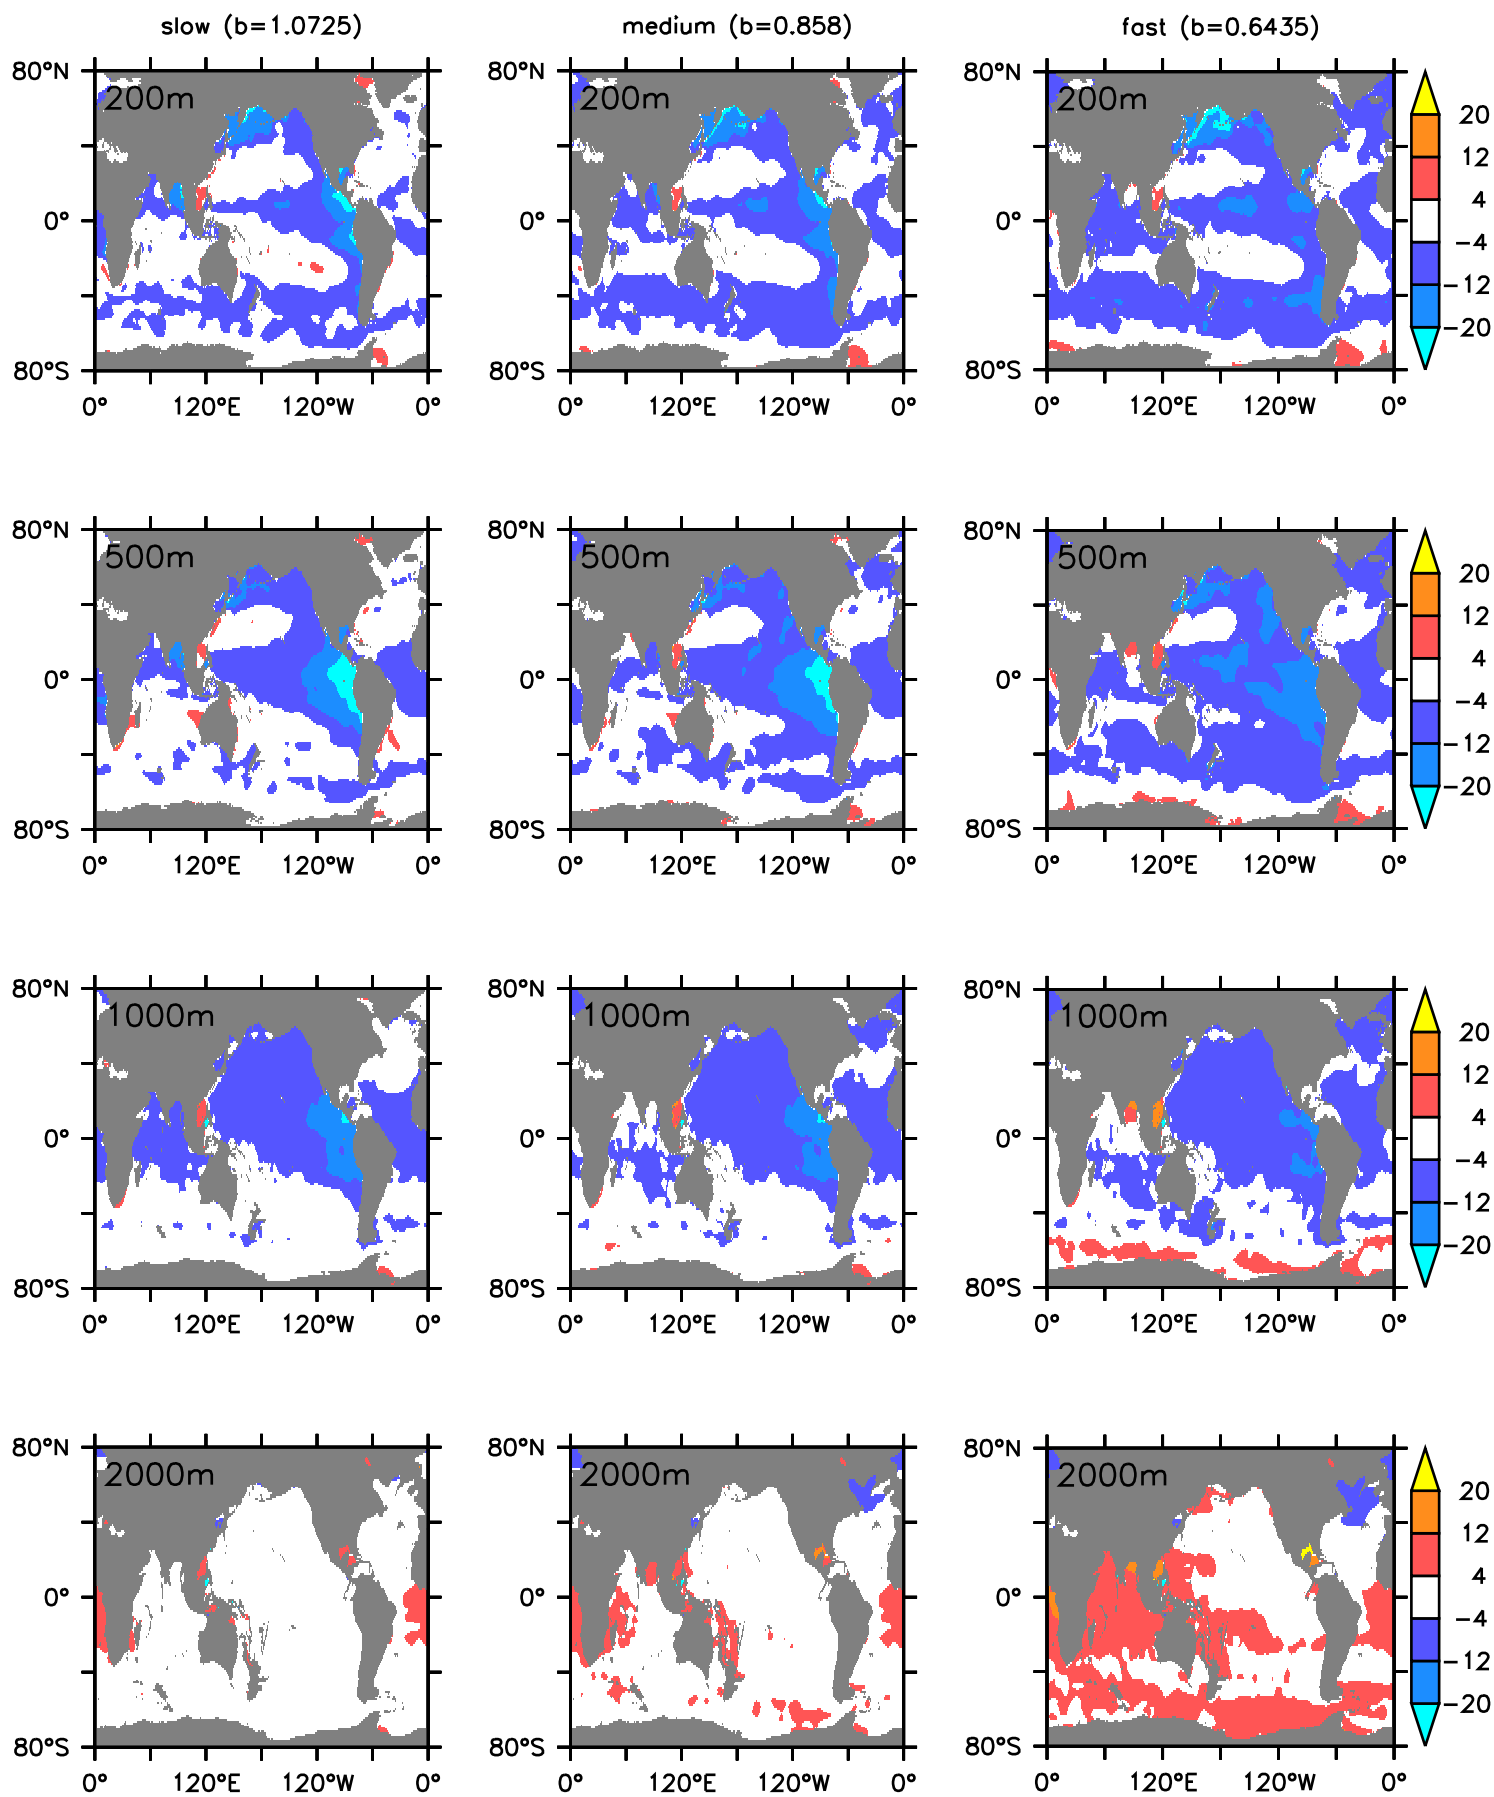

Supplement: Supplementary file 7 [file gmd-8-2929-2015-supplement.zip]

RemHigh, PO<sub>4</sub>, model – obs

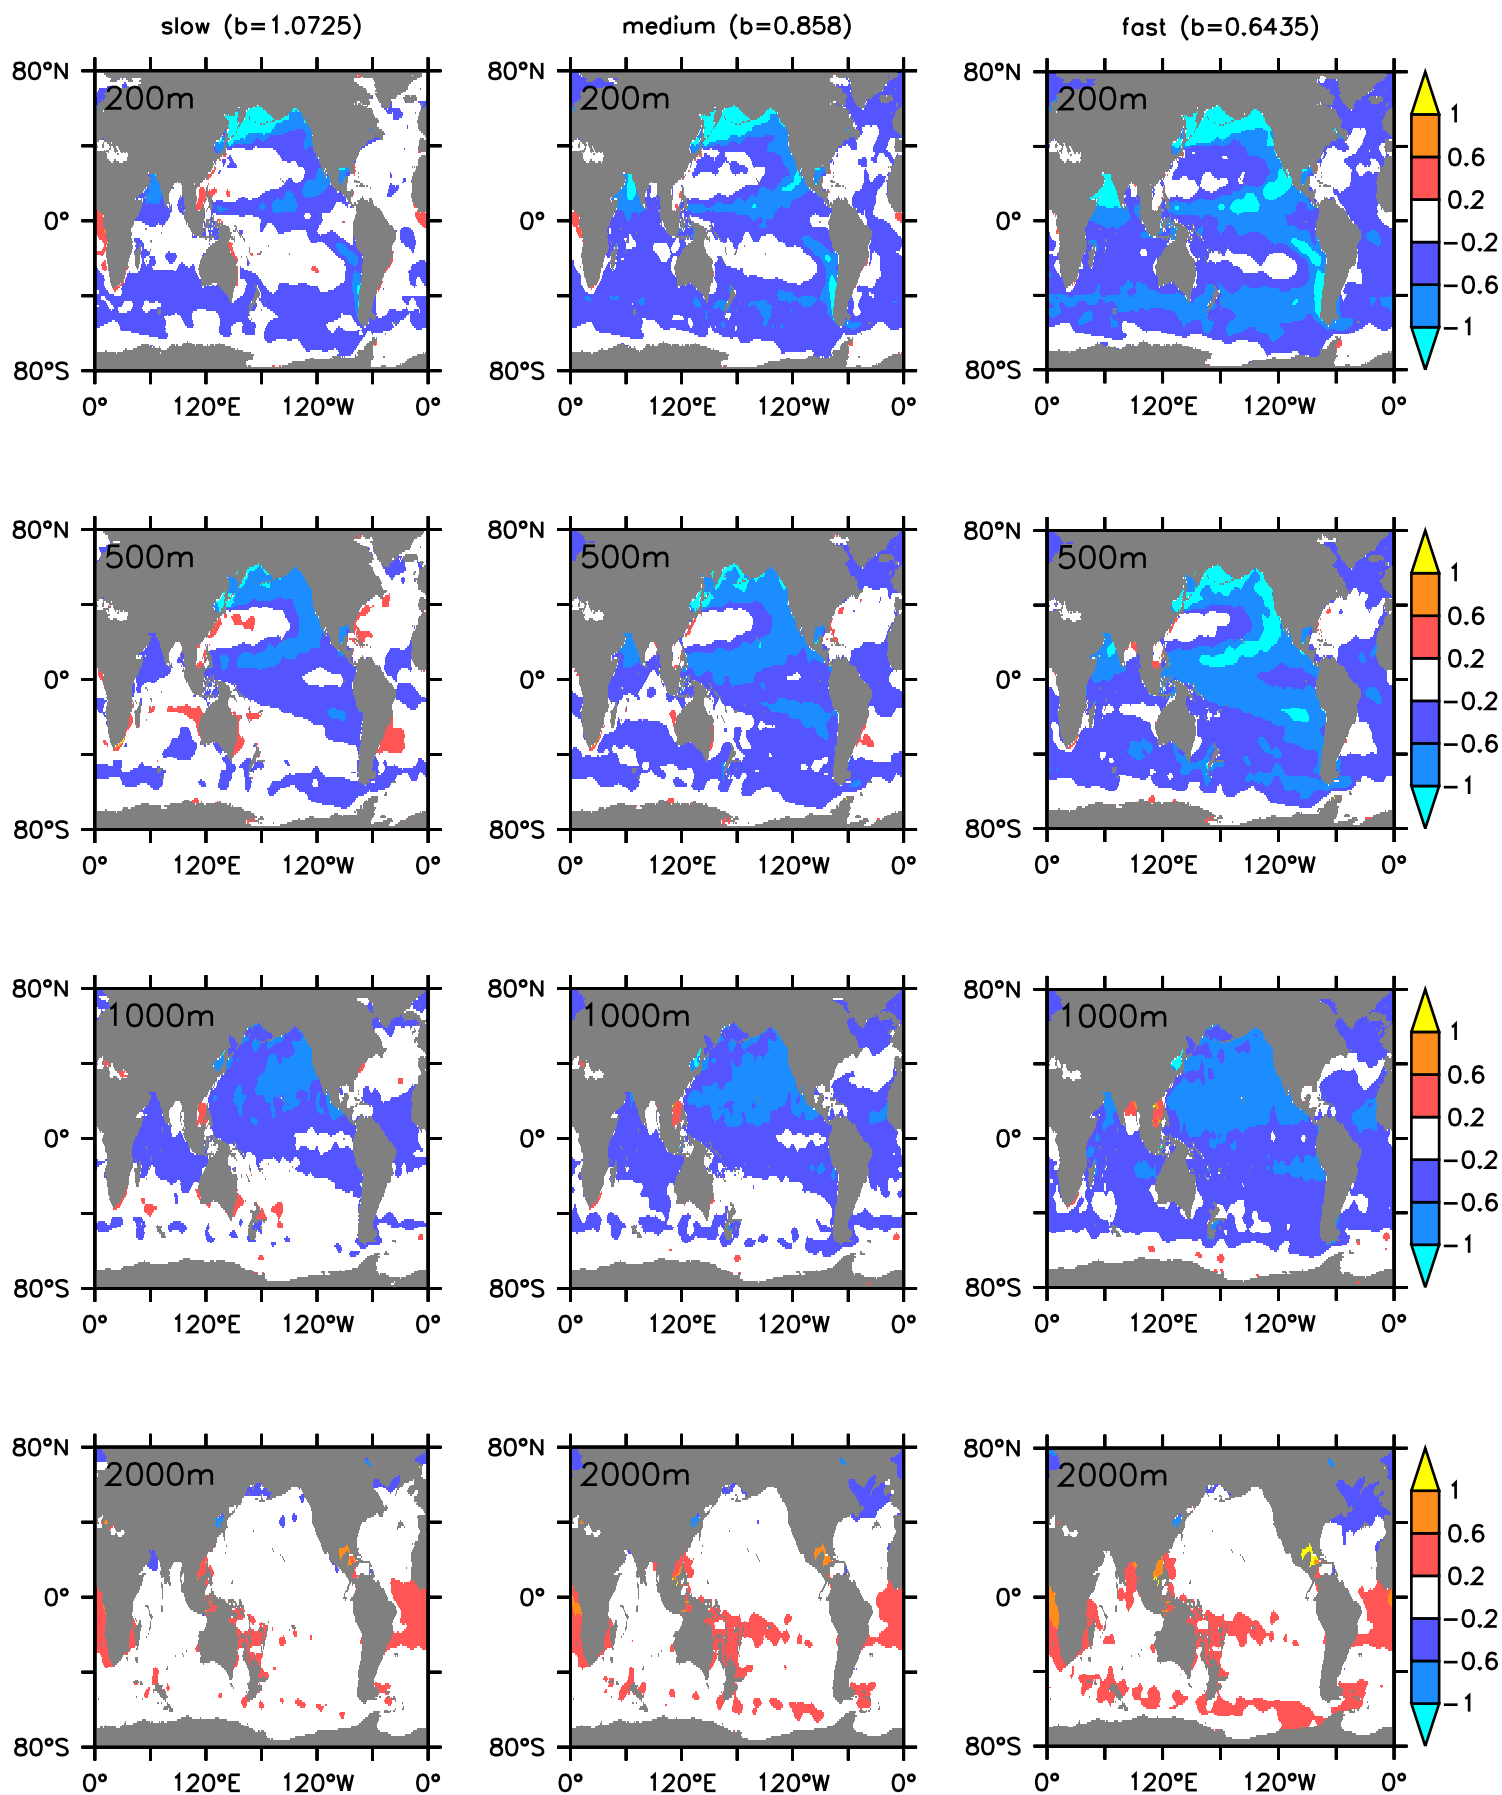

Supplement: Supplementary file 8 [file gmd-8-2929-2015-supplement.zip]

# NFixStoich, PO<sub>4</sub>, model – obs

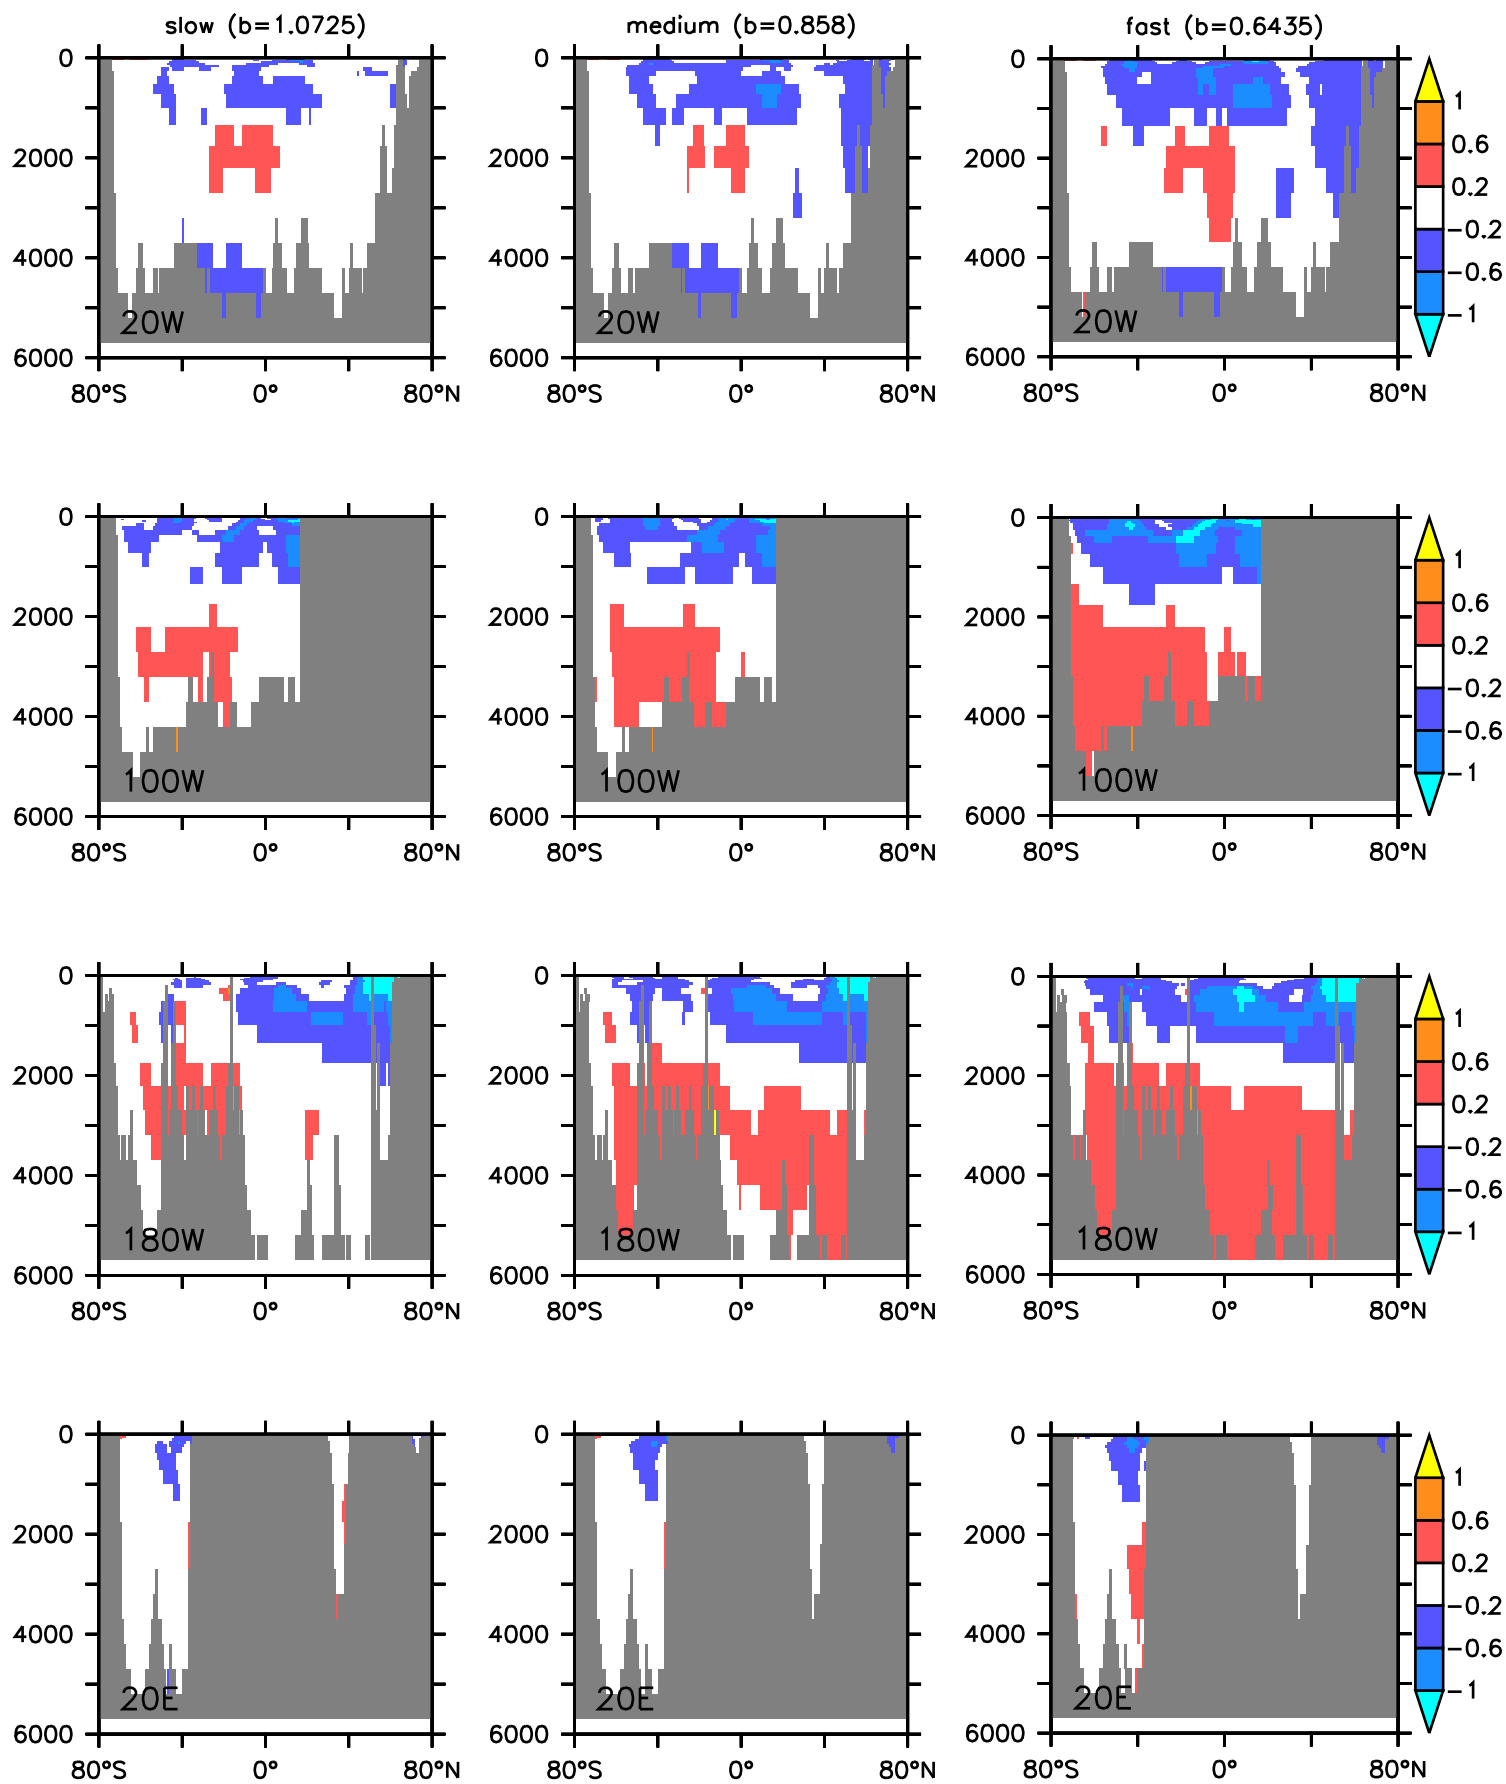

Supplement: Supplementary file 9 [file gmd-8-2929-2015-supplement.zip]

RemHigh, O<sub>2</sub>, model – obs

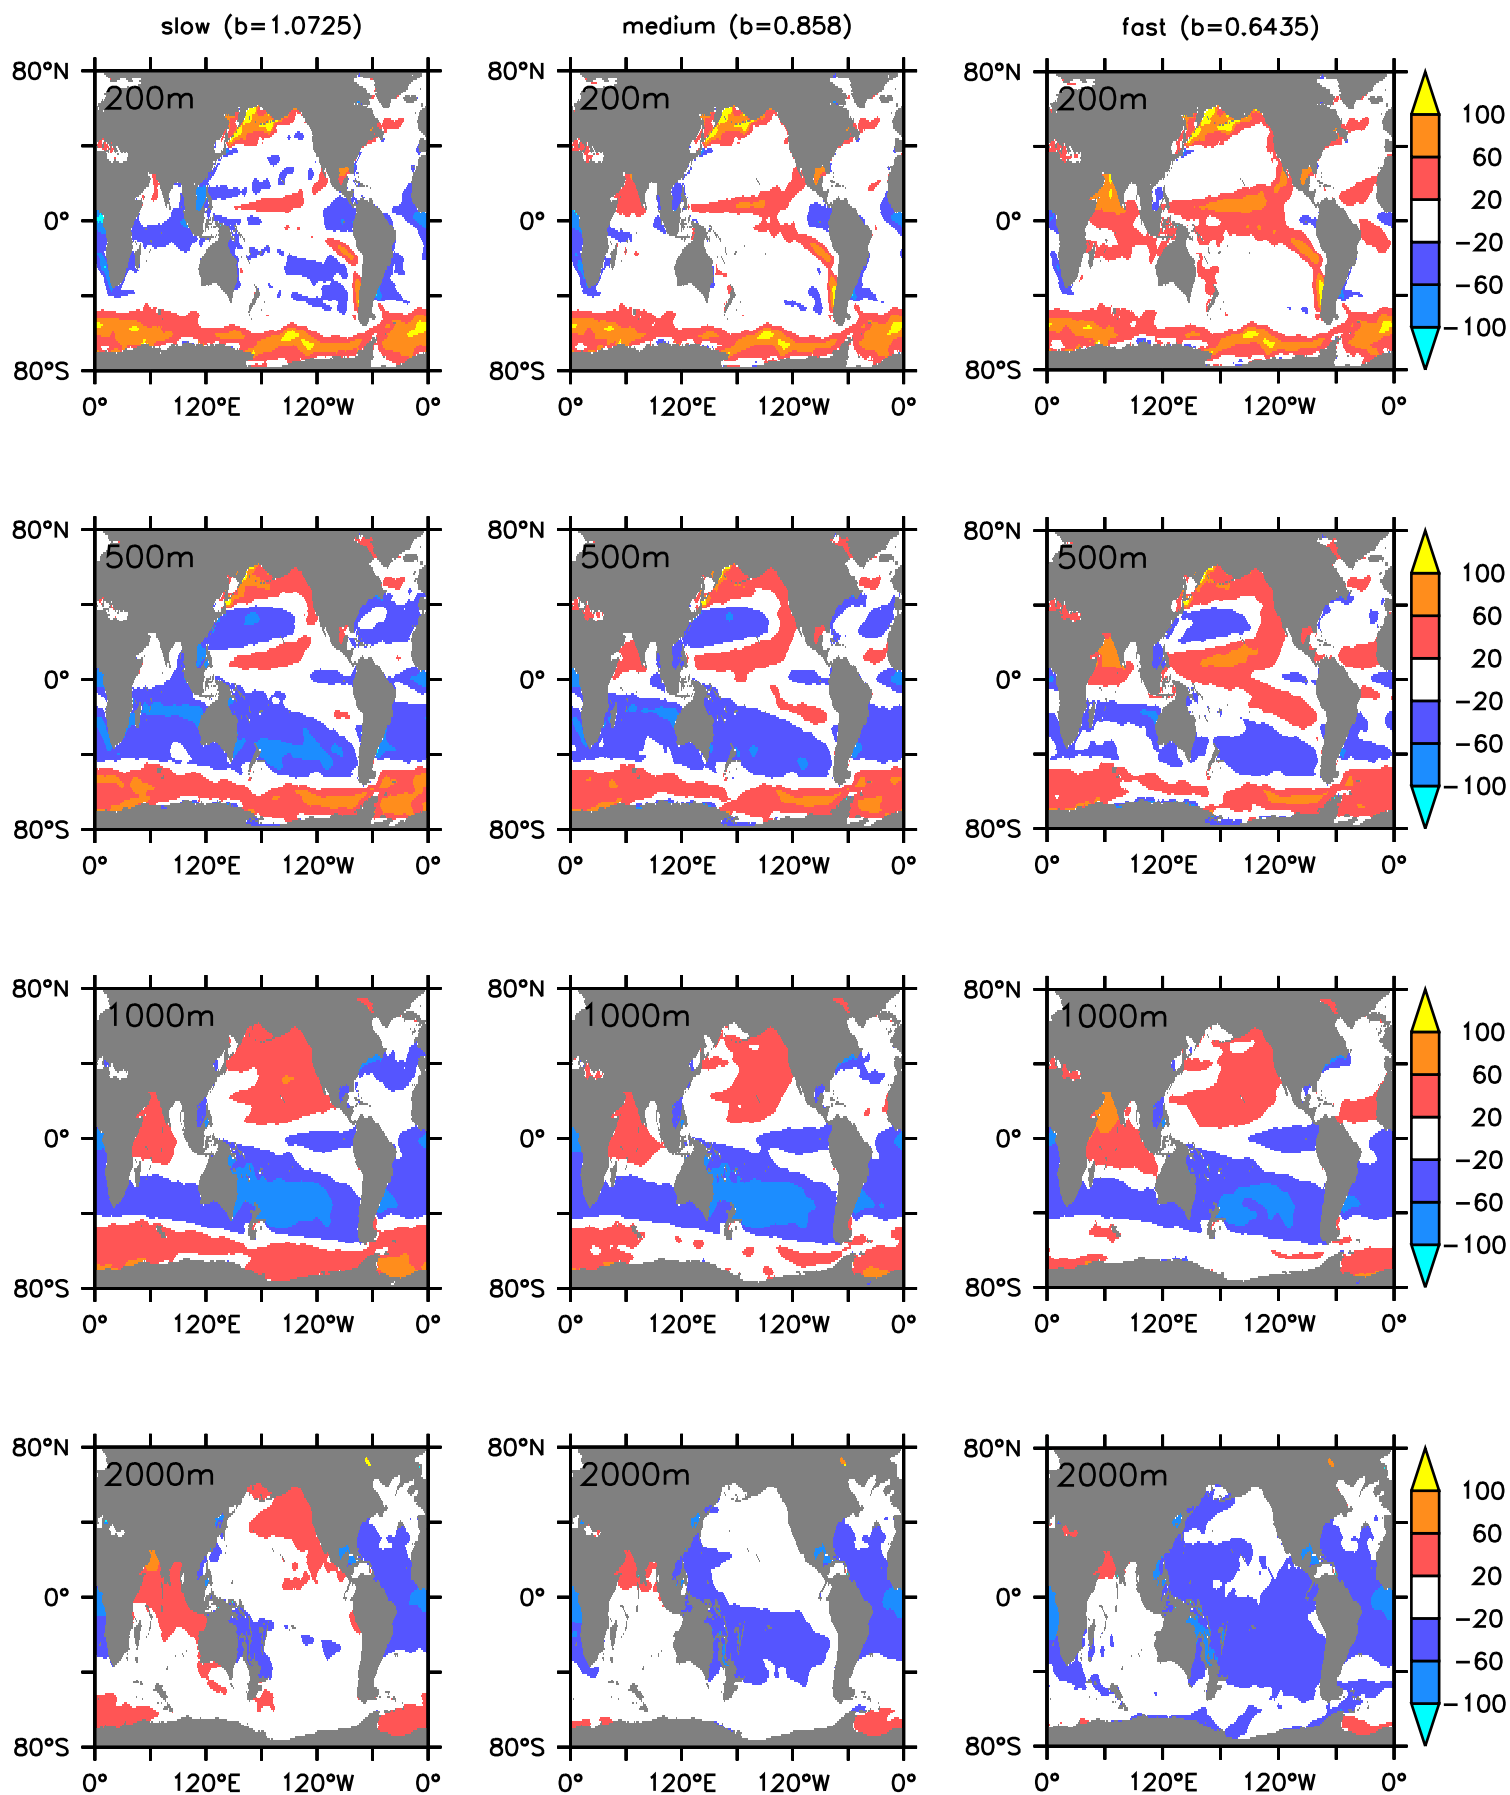

Supplement: Supplementary file 10 [file gmd-8-2929-2015-supplement.zip]

# BASE

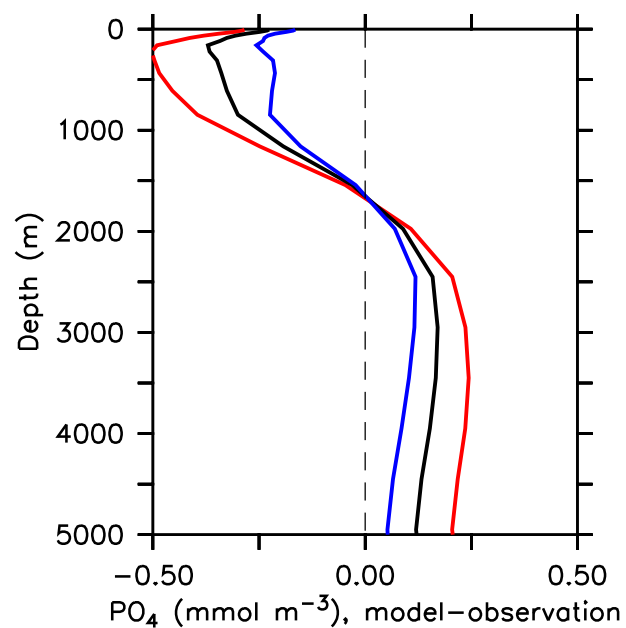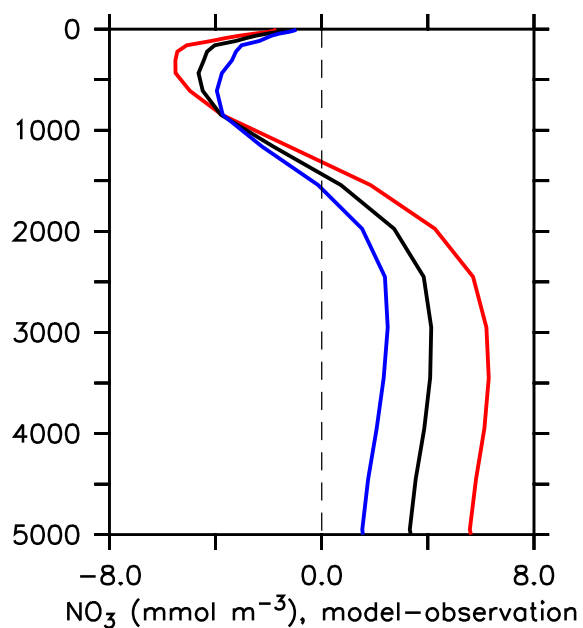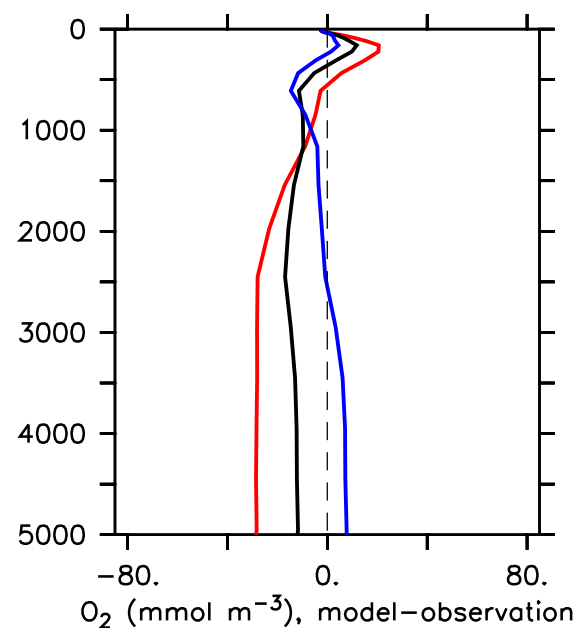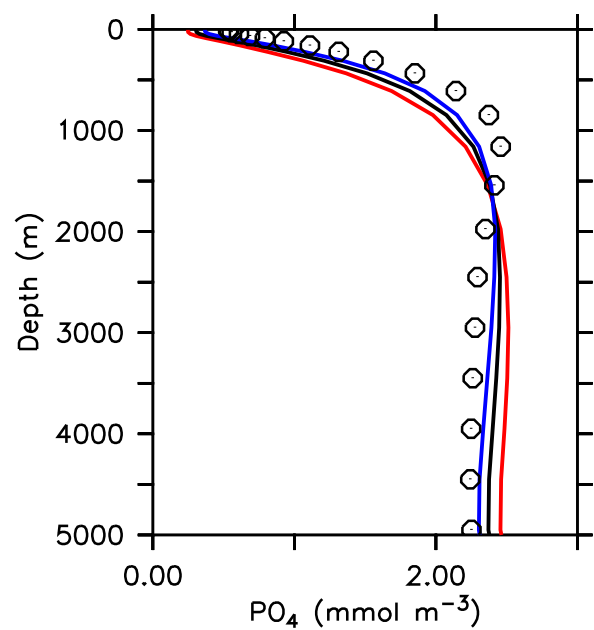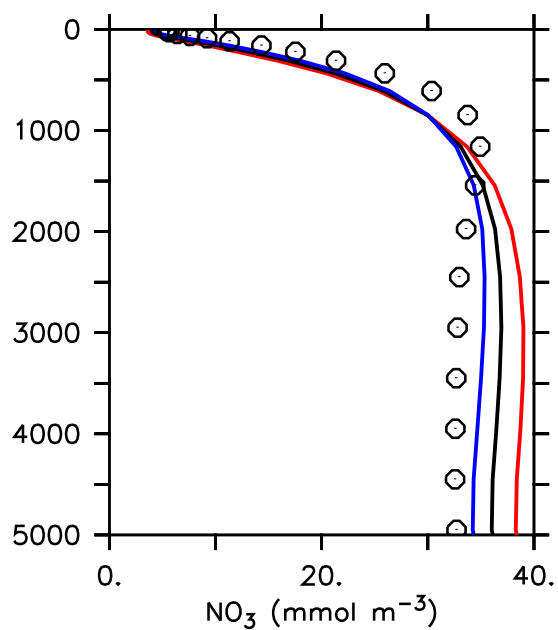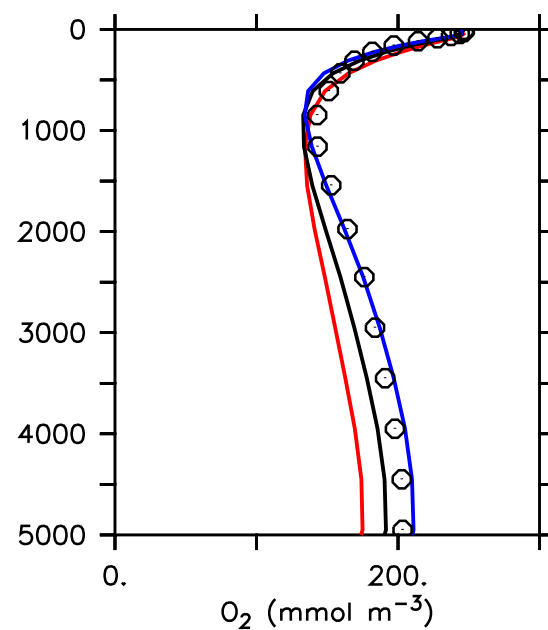

Supplement: Supplementary file 11 [file gmd-8-2929-2015-supplement.zip]

RemHigh, NO<sub>3</sub>, model – obs

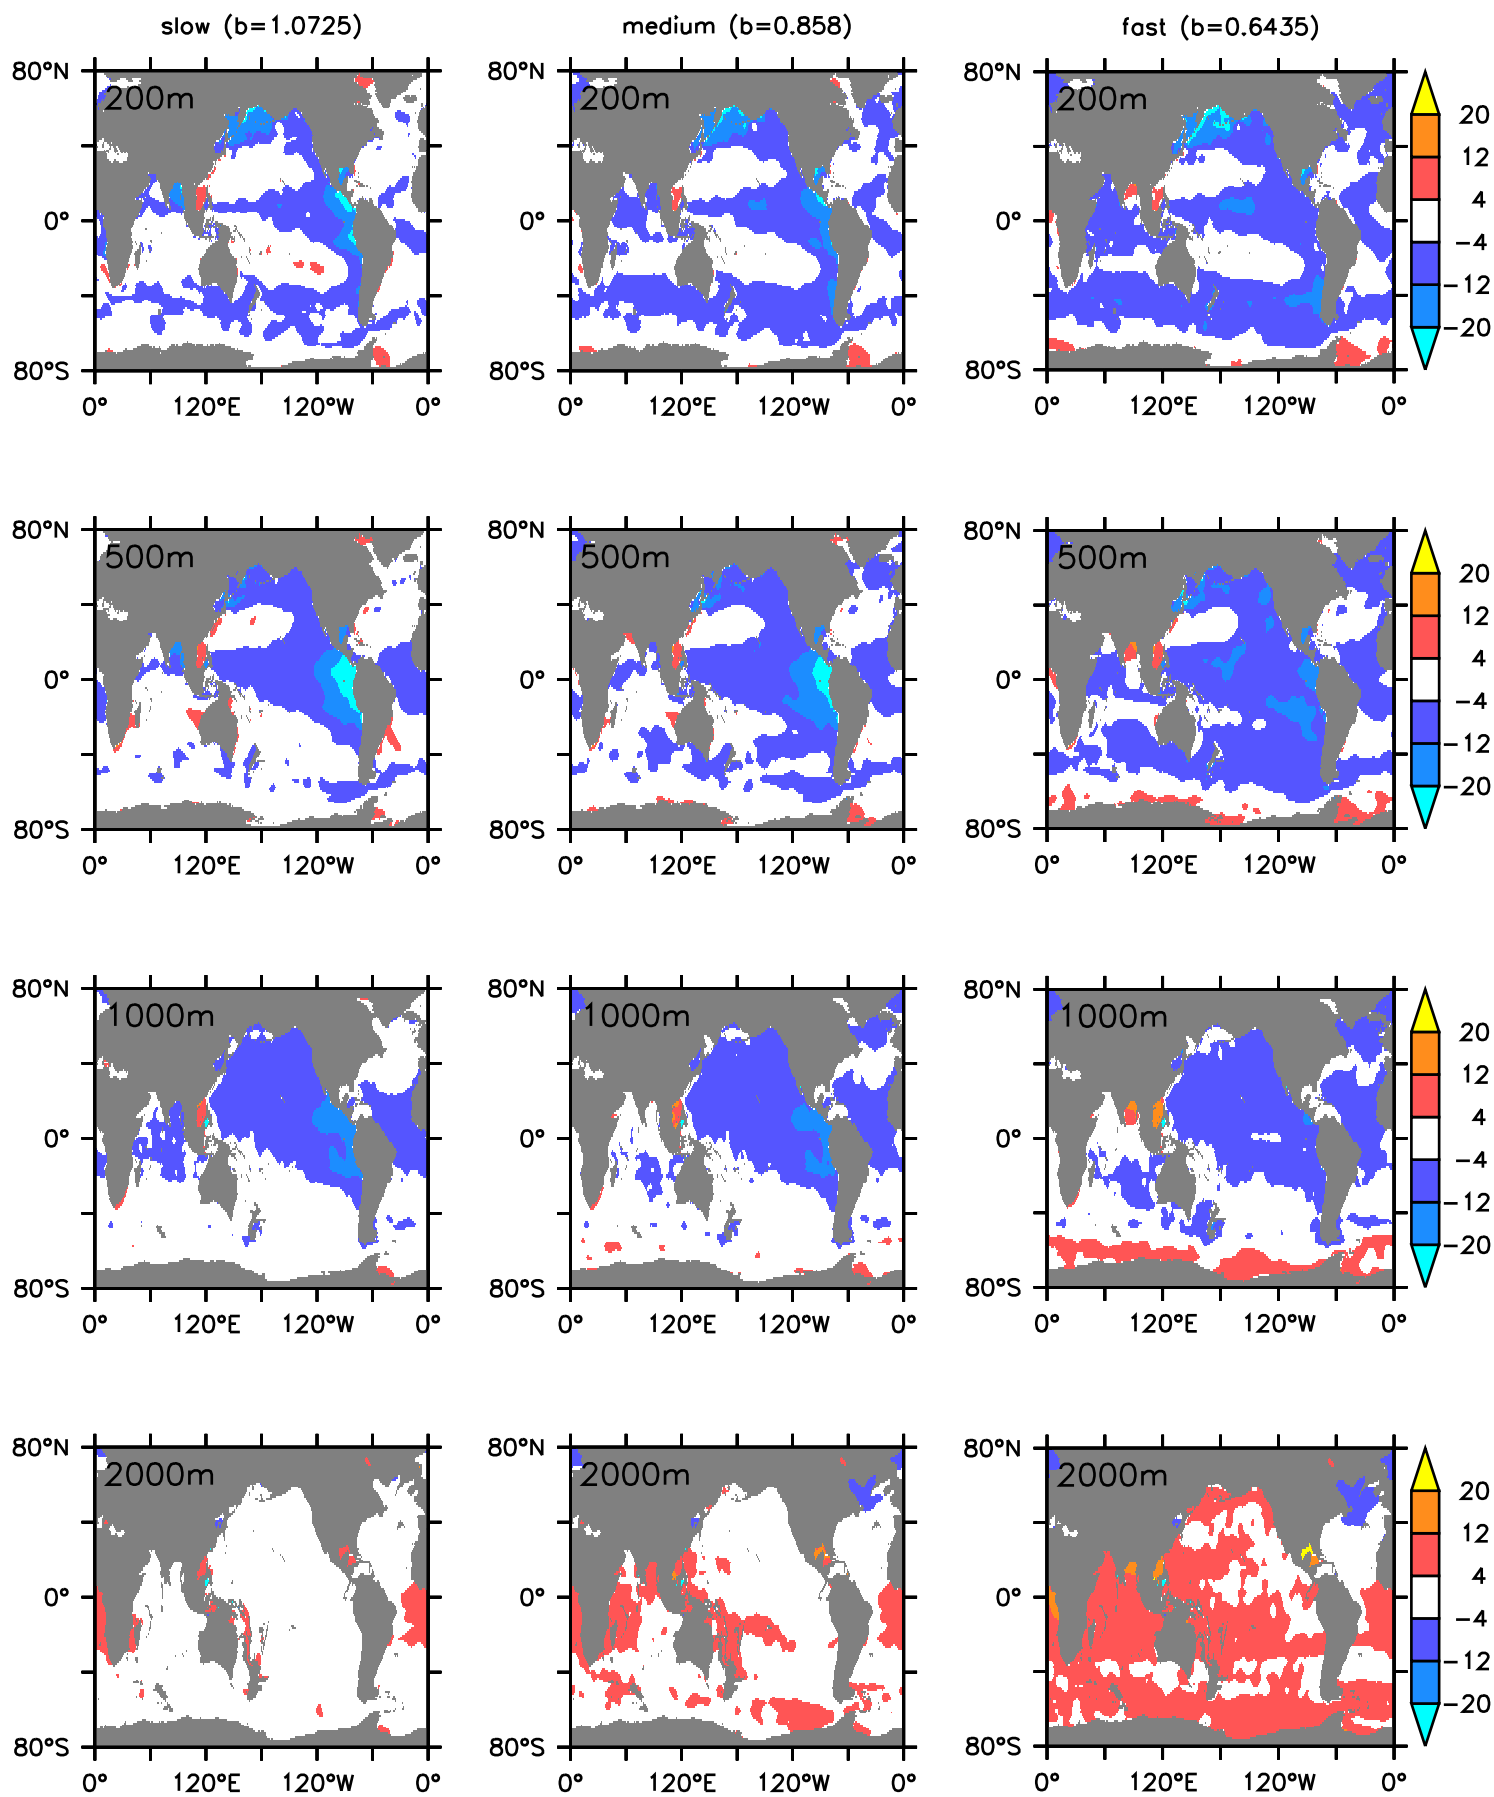

Supplement: Supplementary file 12 [file gmd-8-2929-2015-supplement.zip]

# NFixStoich, PO<sub>4</sub>, model – obs

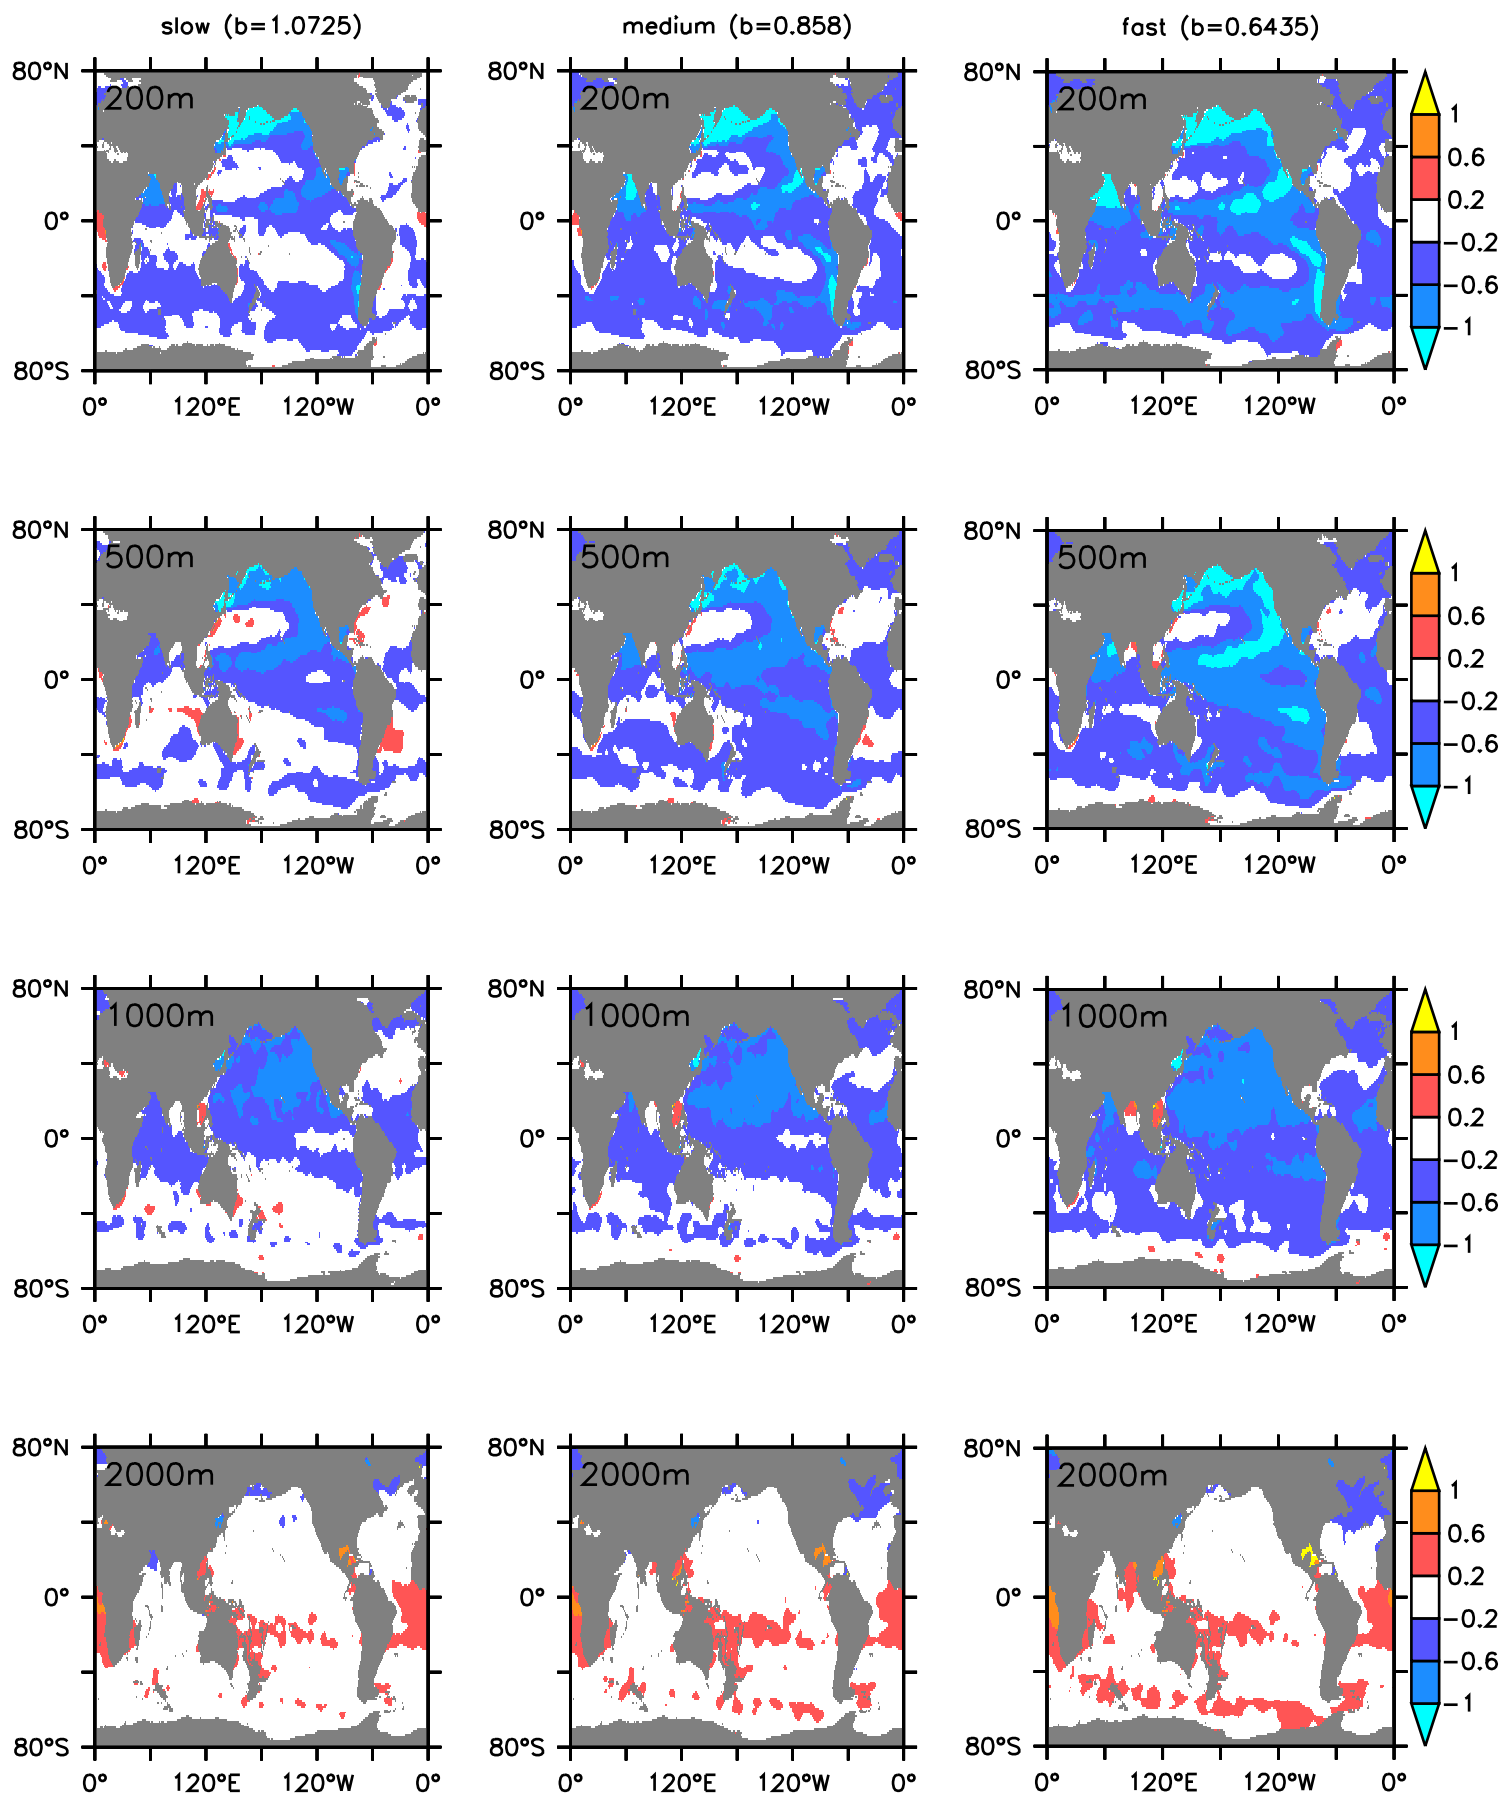

Supplement: Supplementary file 13 [file gmd-8-2929-2015-supplement.zip]

# NFixStoich, O<sub>2</sub>, model – obs

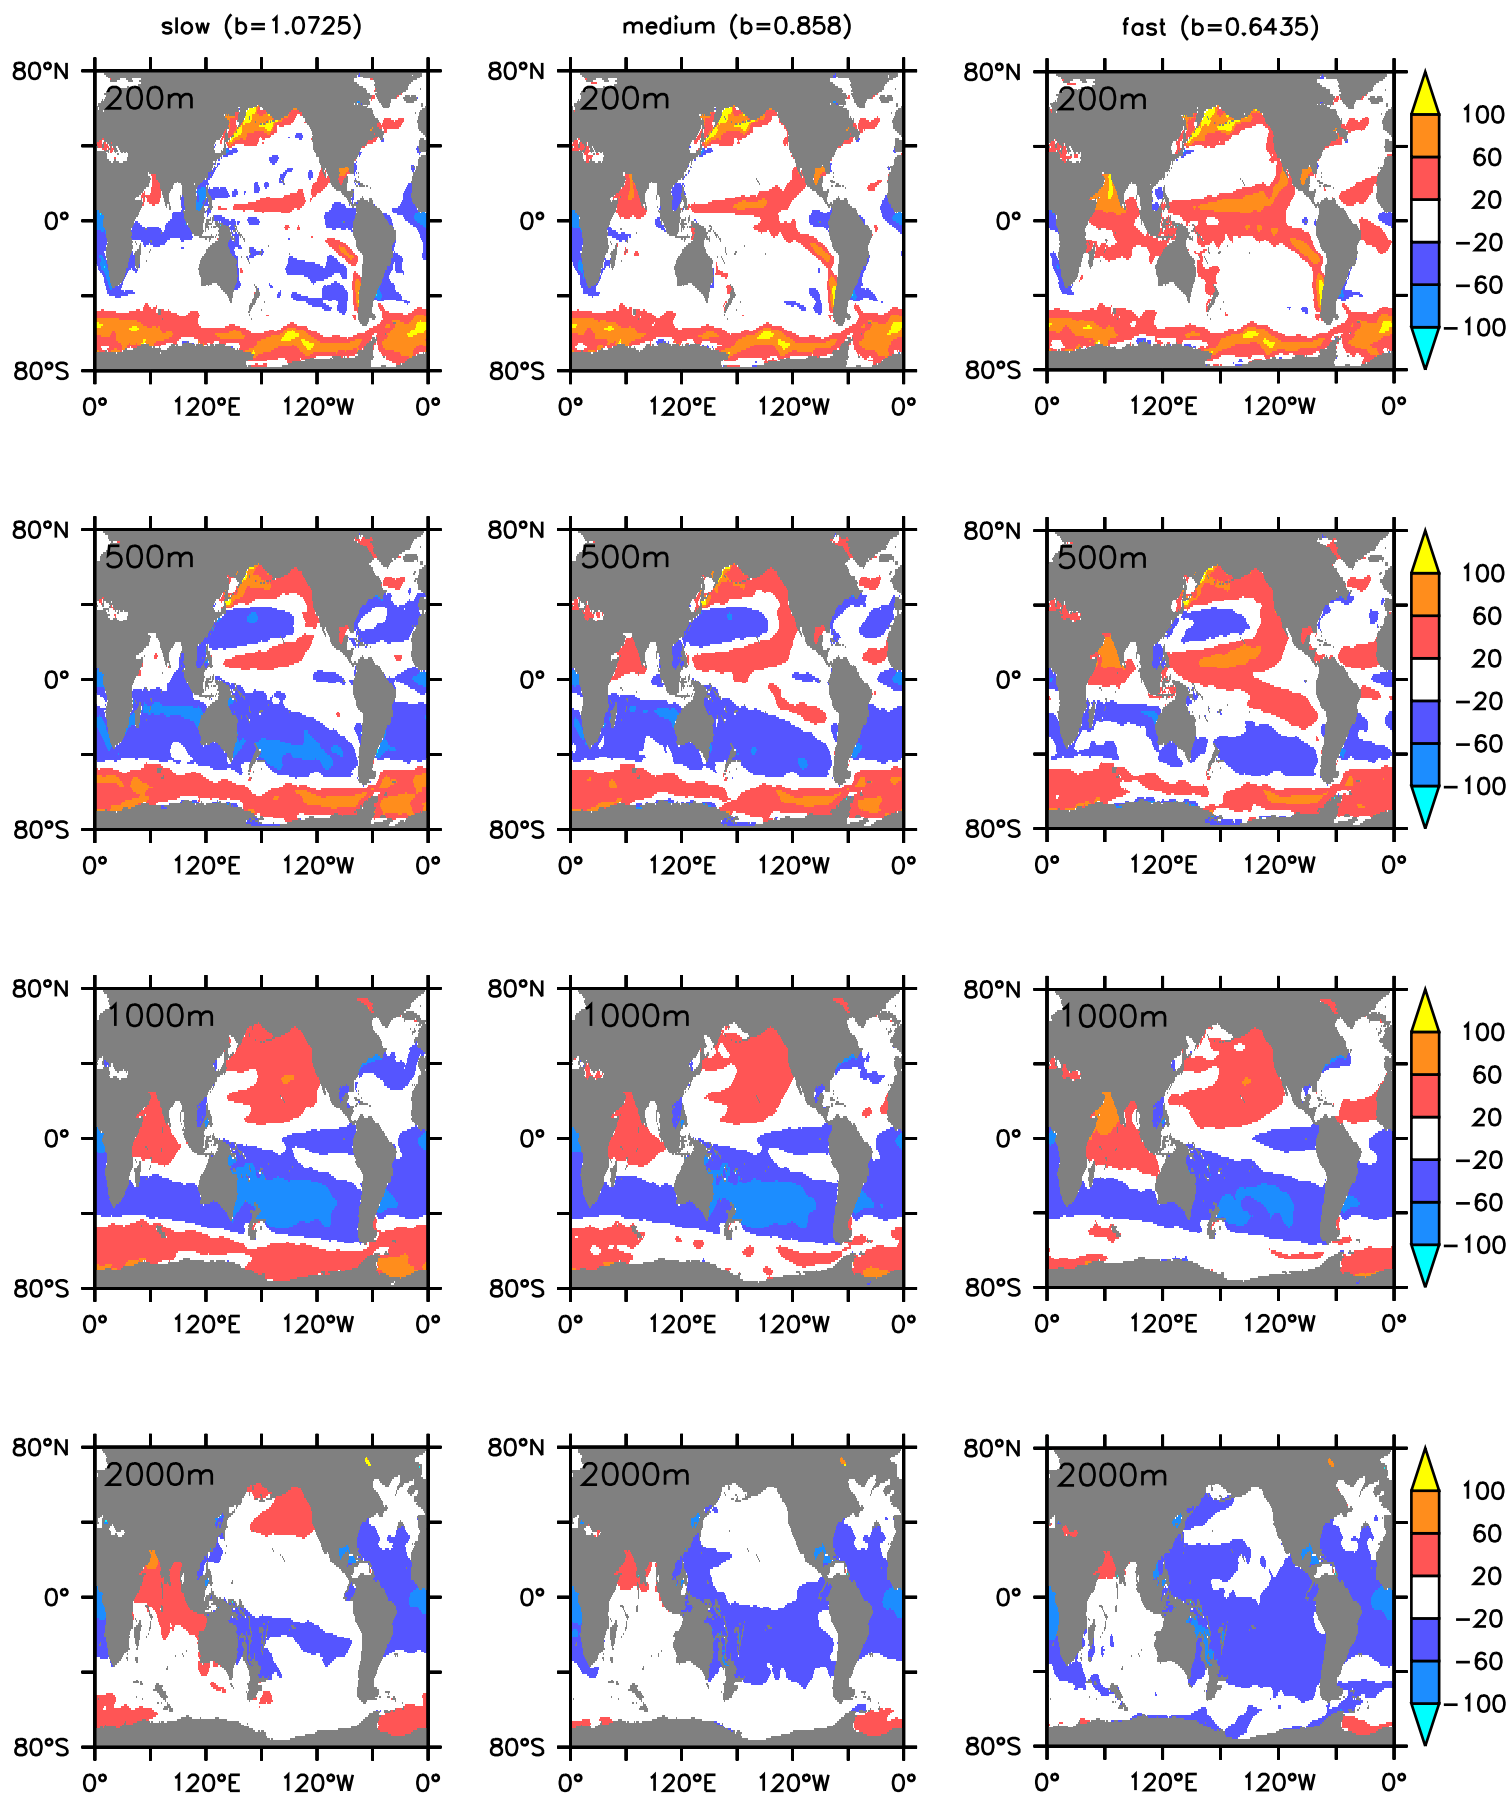

Supplement: Supplementary file 14 [file gmd-8-2929-2015-supplement.zip]

RemHigh, NO<sub>3</sub>, model - obs

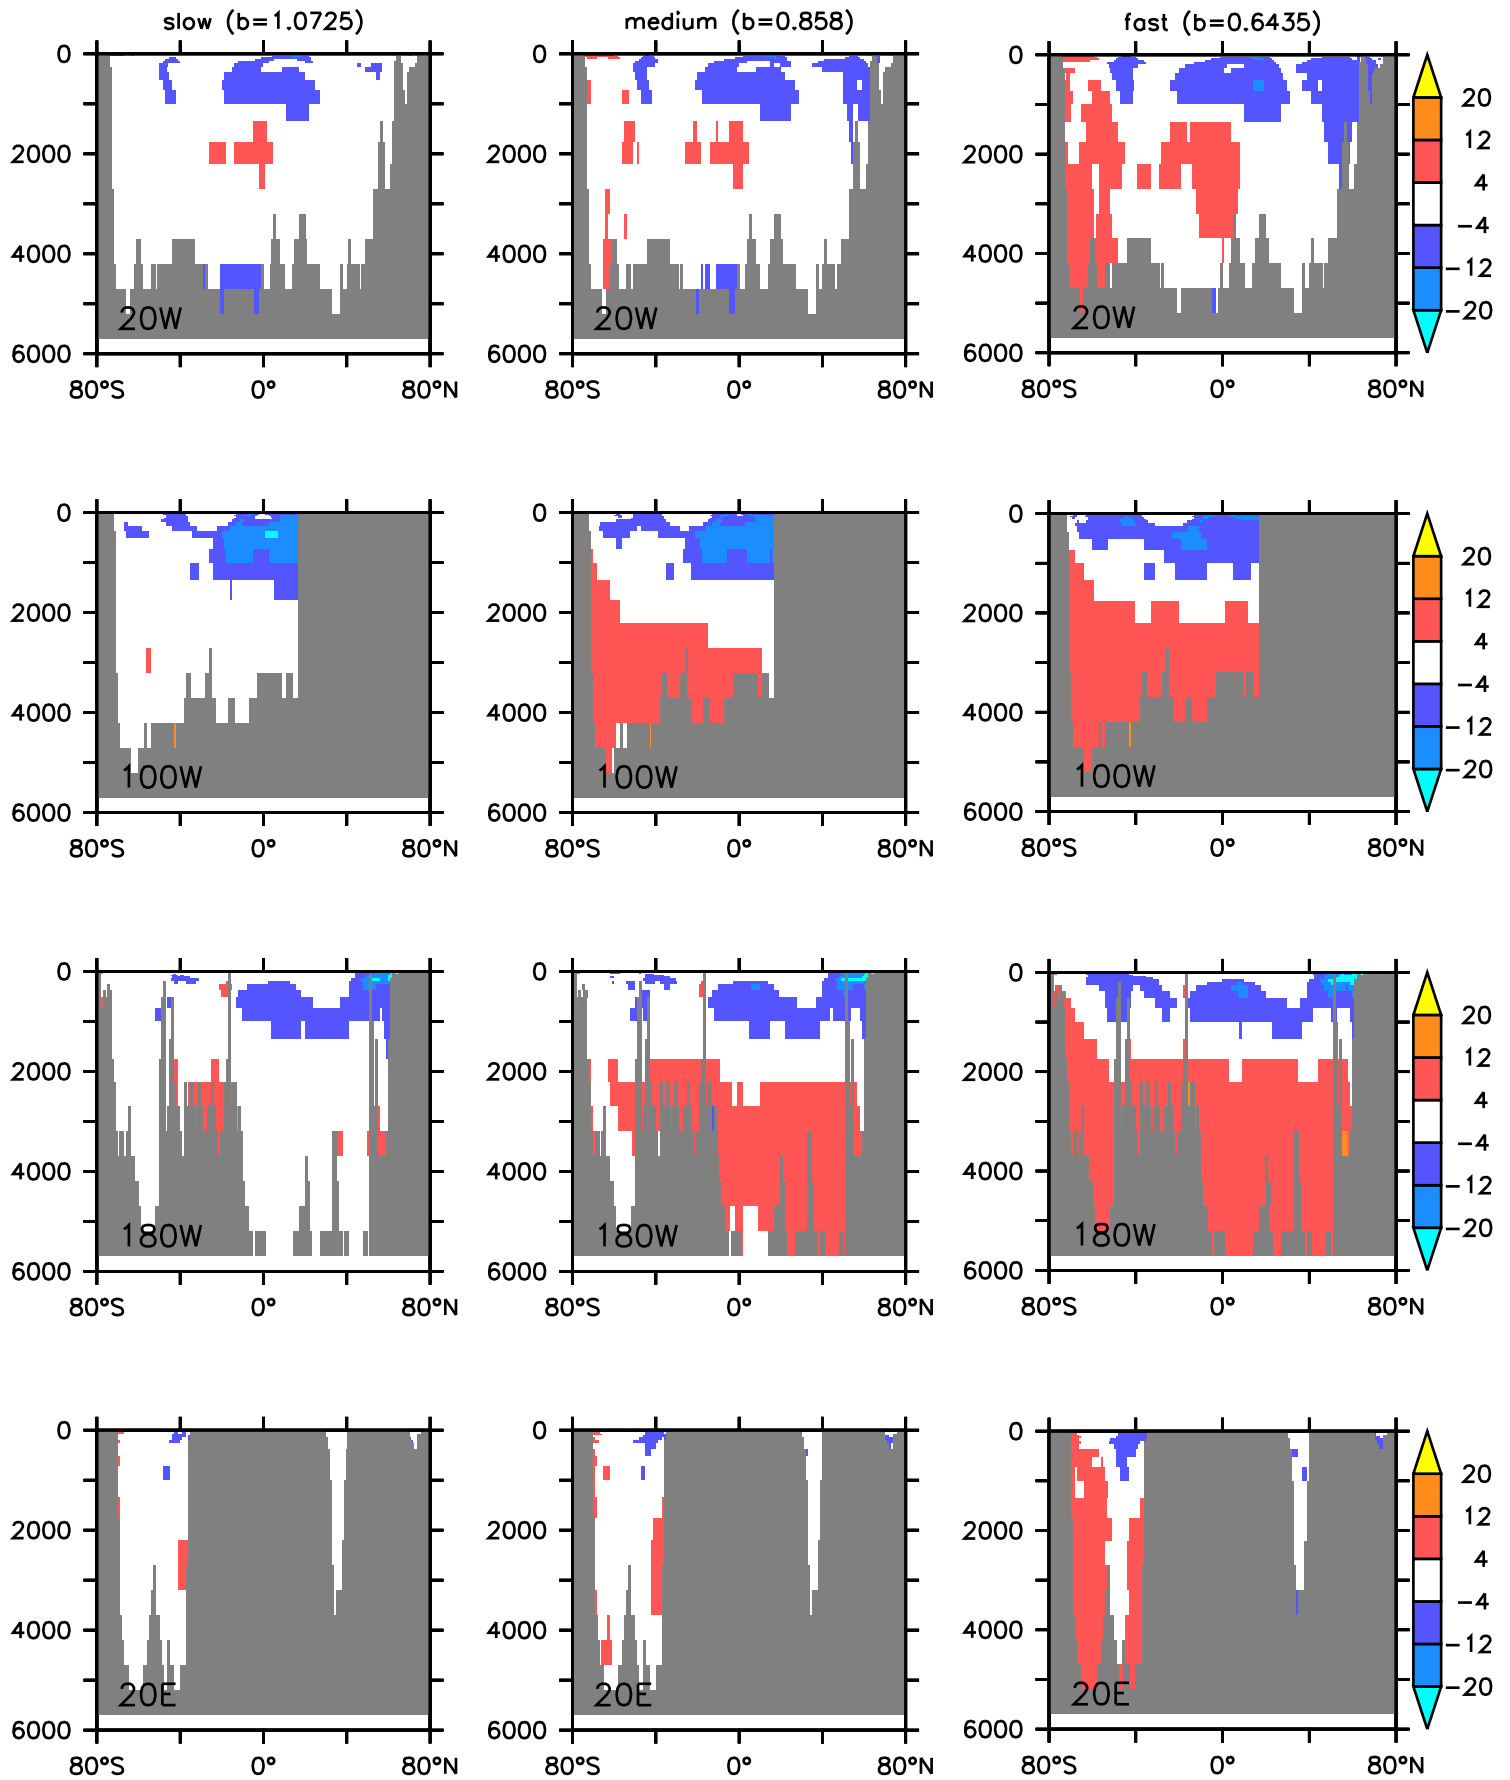

Supplement: Supplementary file 15 [file gmd-8-2929-2015-supplement.zip]

# BASE, NO<sub>3</sub>, model - obs

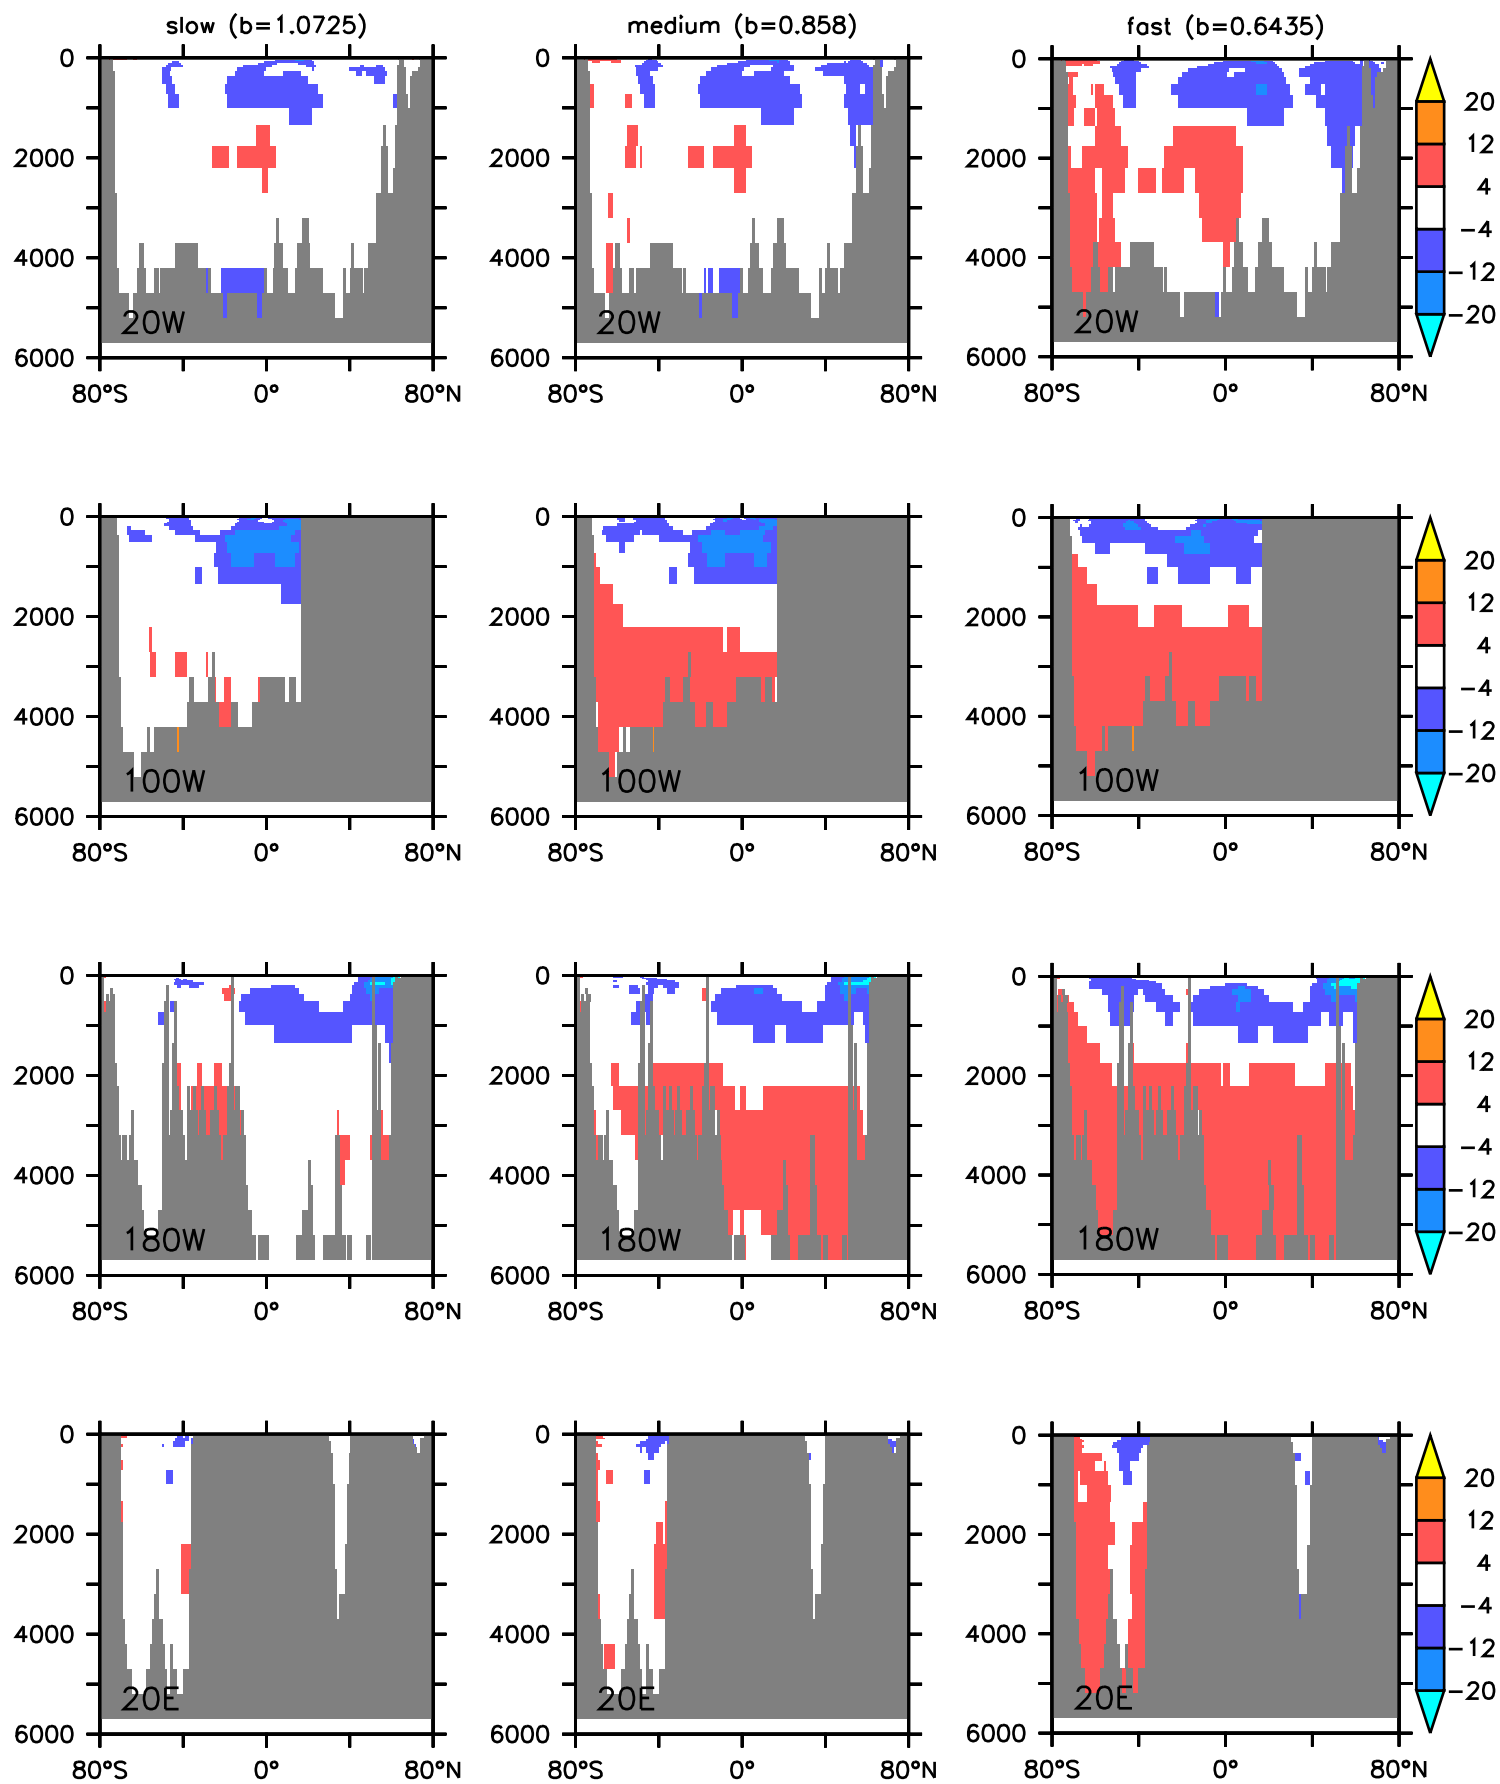

Supplement: Supplementary file 16 [file gmd-8-2929-2015-supplement.zip]

RemHigh, O<sub>2</sub>, model – obs

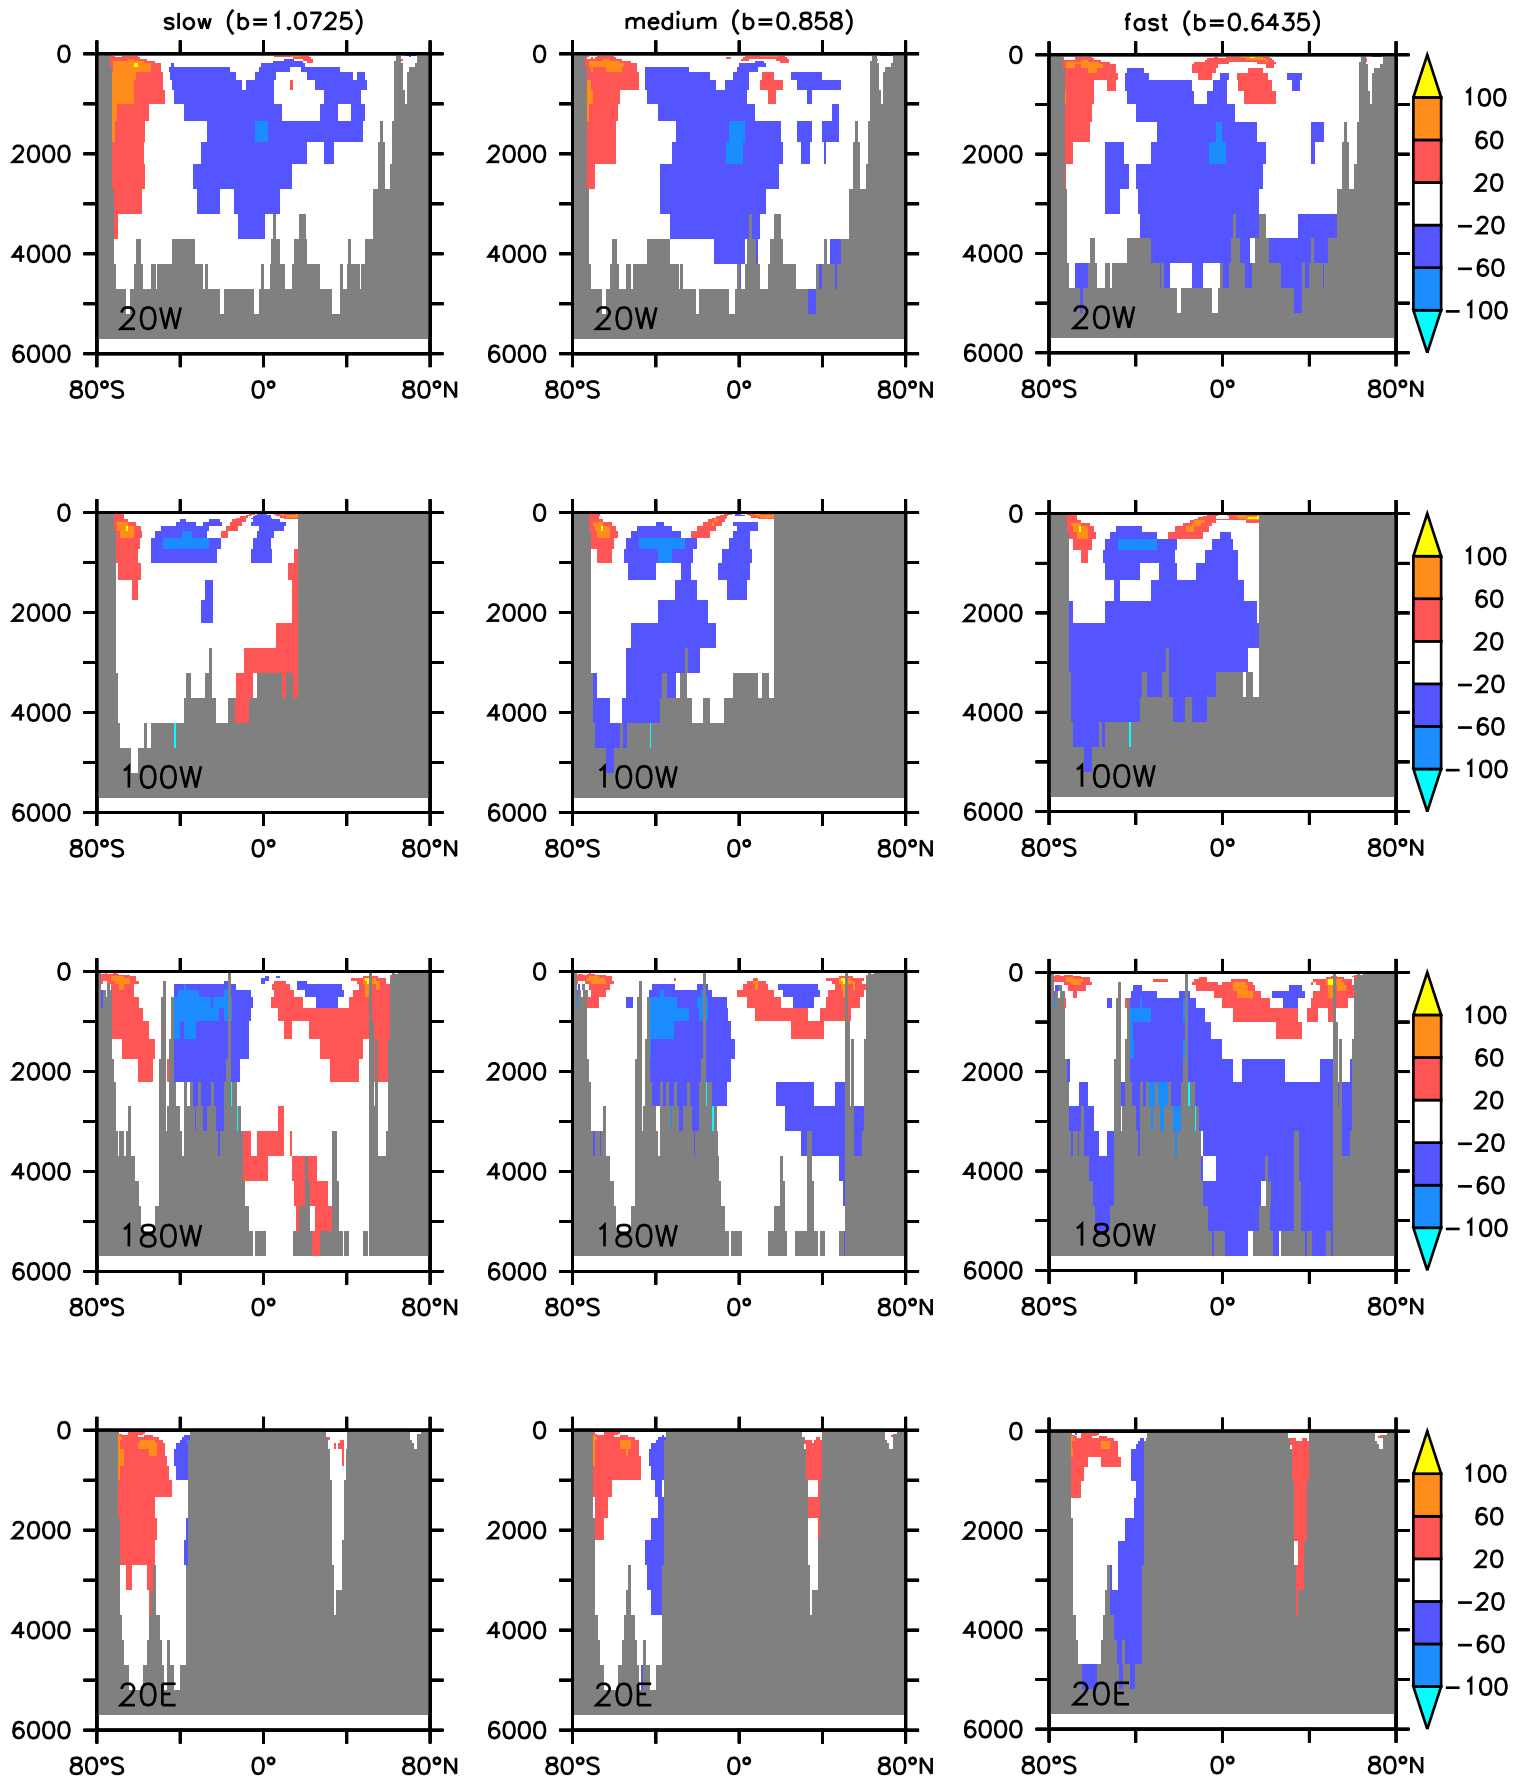

Supplement: Supplementary file 17 [file gmd-8-2929-2015-supplement.zip]

# NFixNoTemp

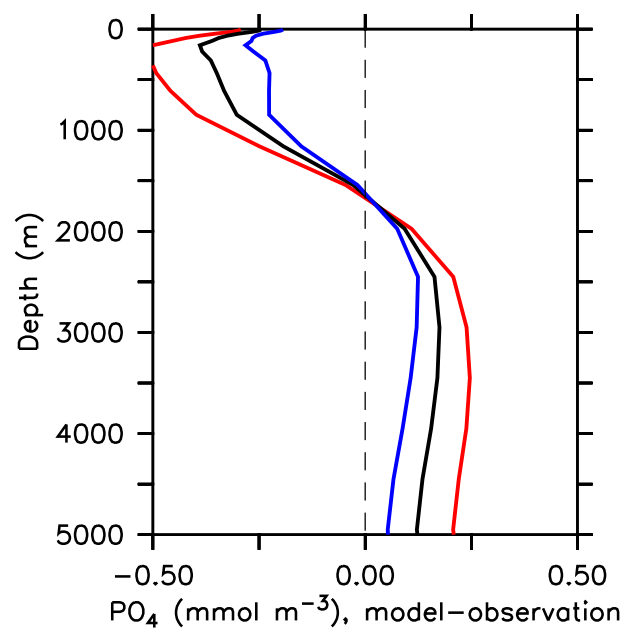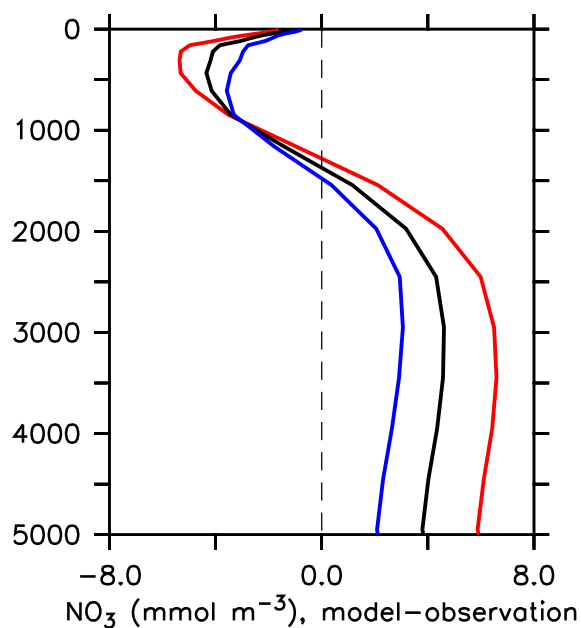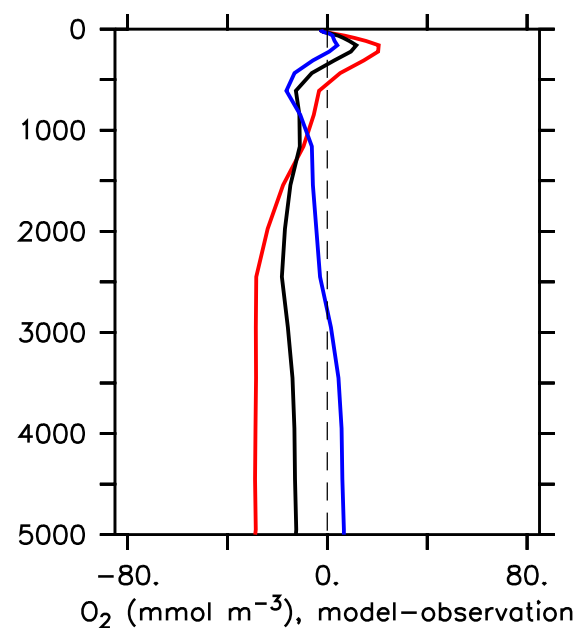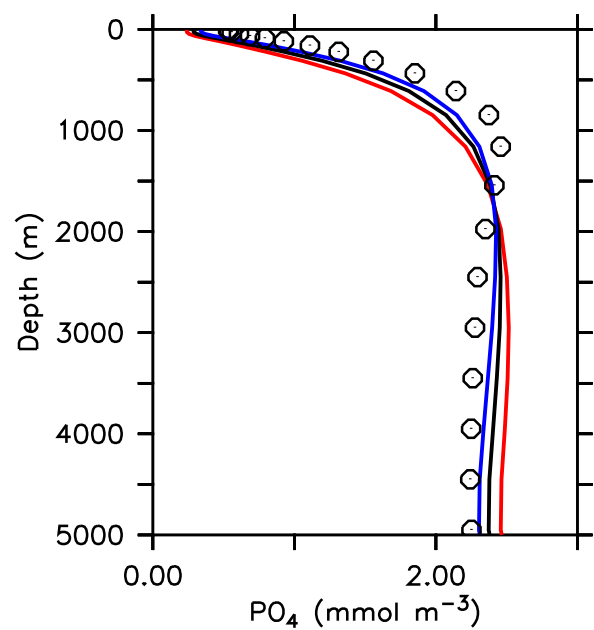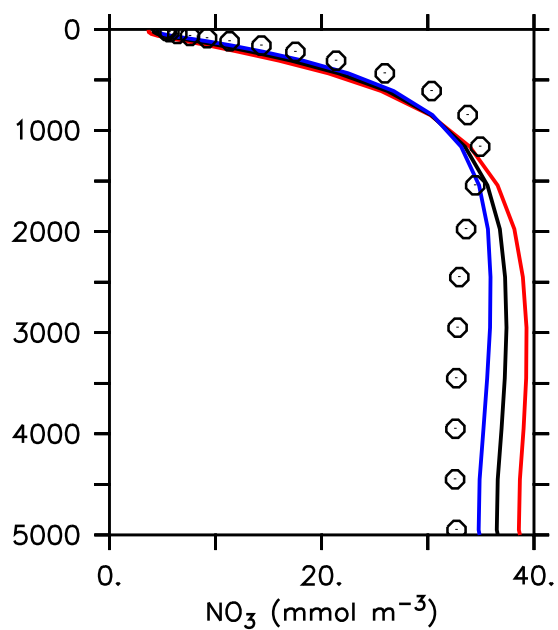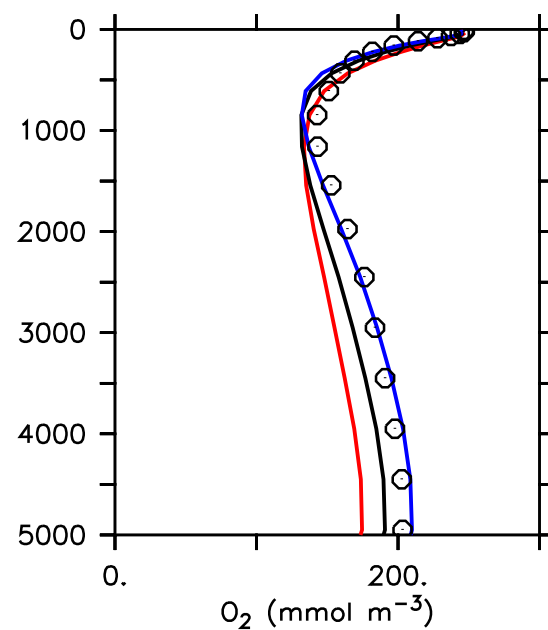

Supplement: Supplementary file 18 [file gmd-8-2929-2015-supplement.zip]

DenHigh, PO<sub>4</sub>, model – obs

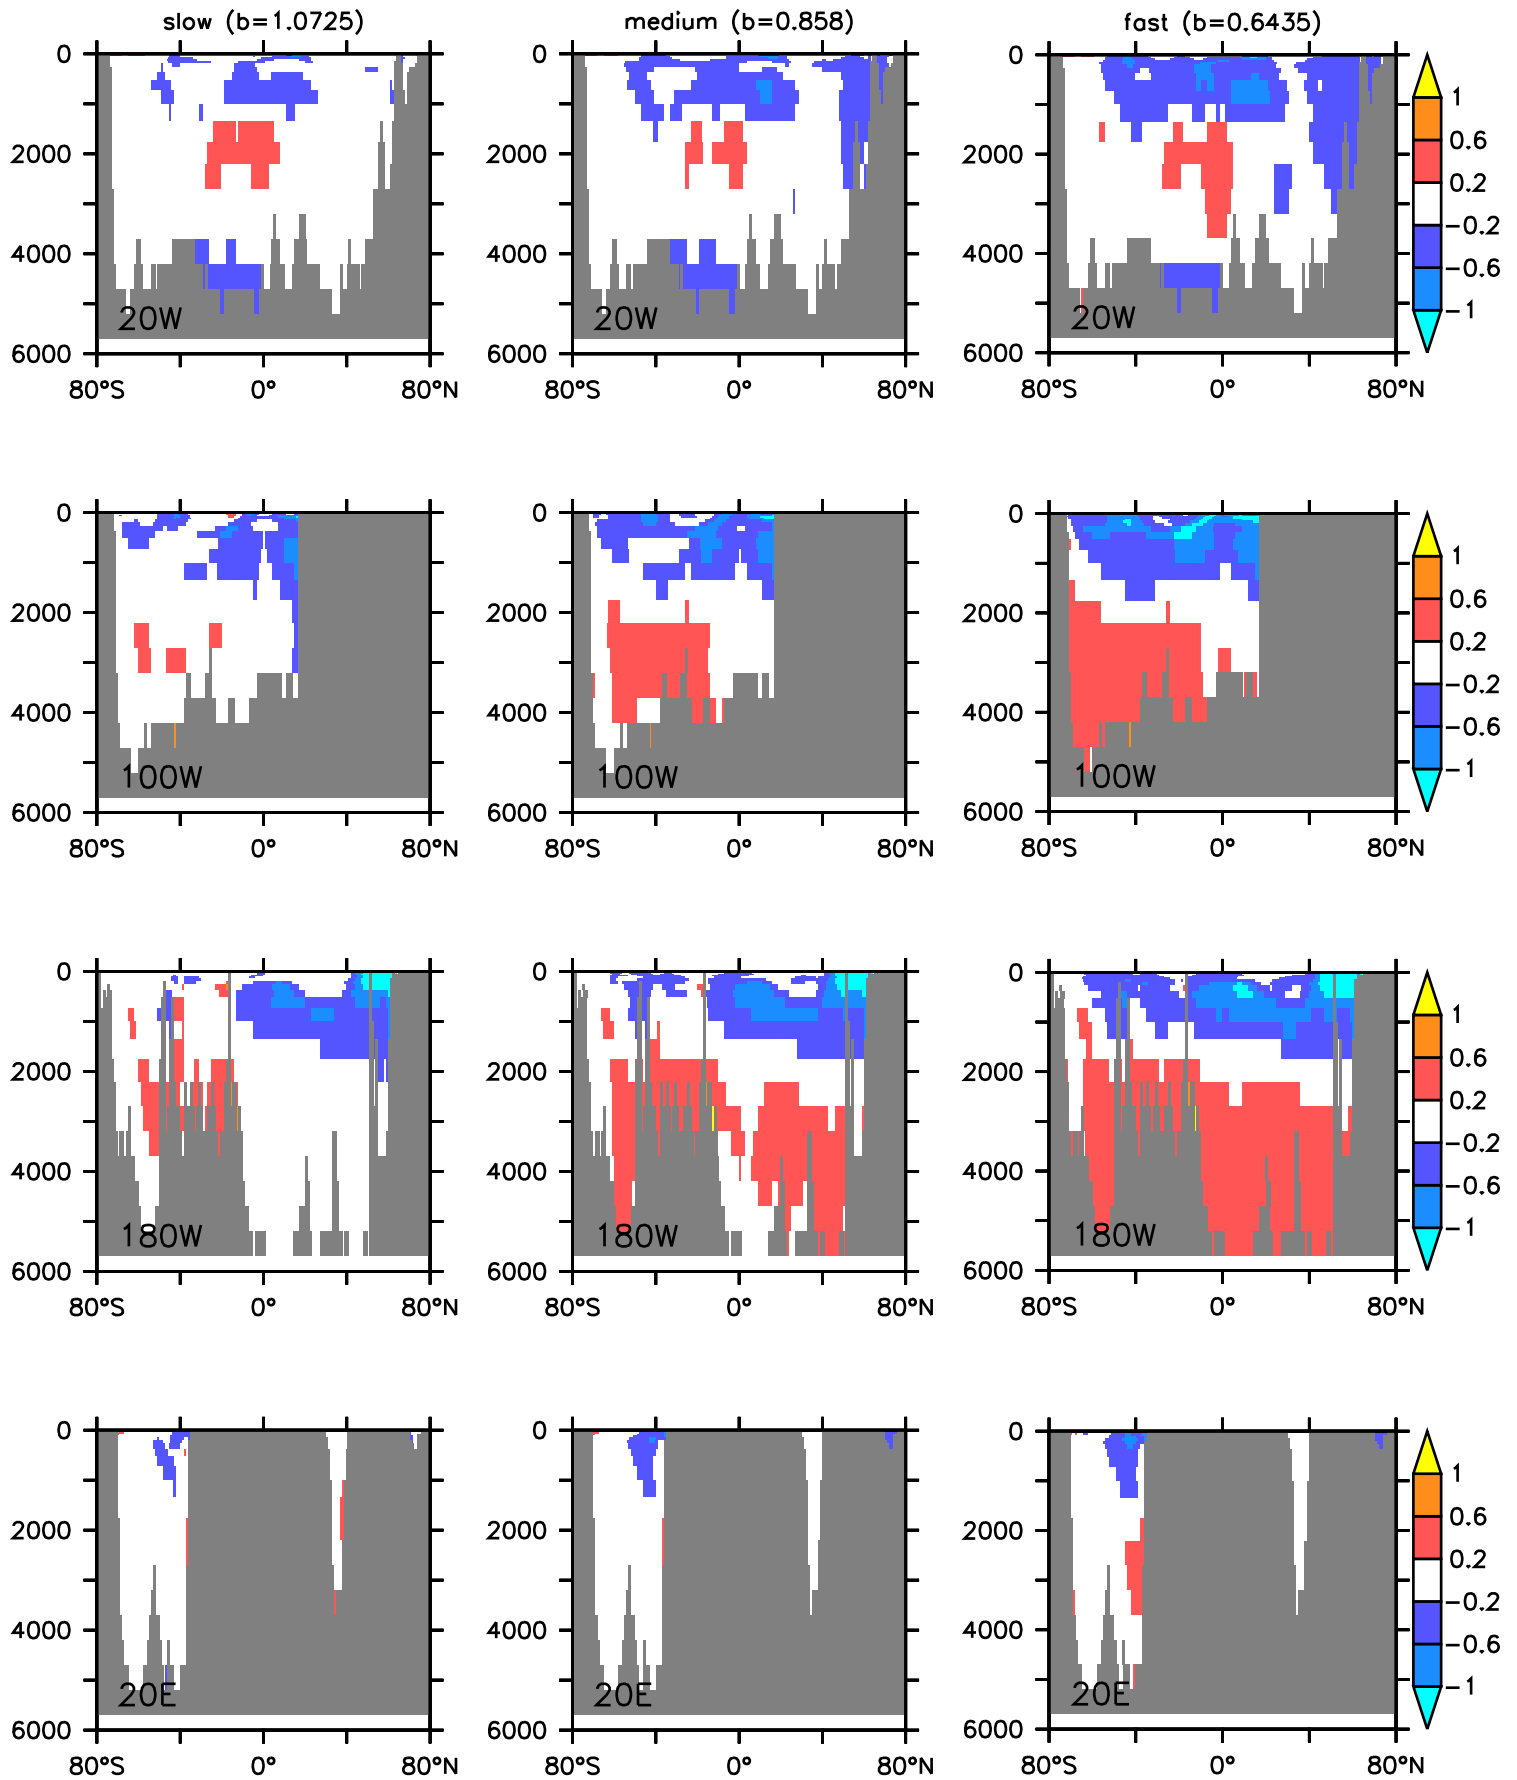

Supplement: Supplementary file 19 [file gmd-8-2929-2015-supplement.zip]

DenHigh, PO<sub>4</sub>, model – obs

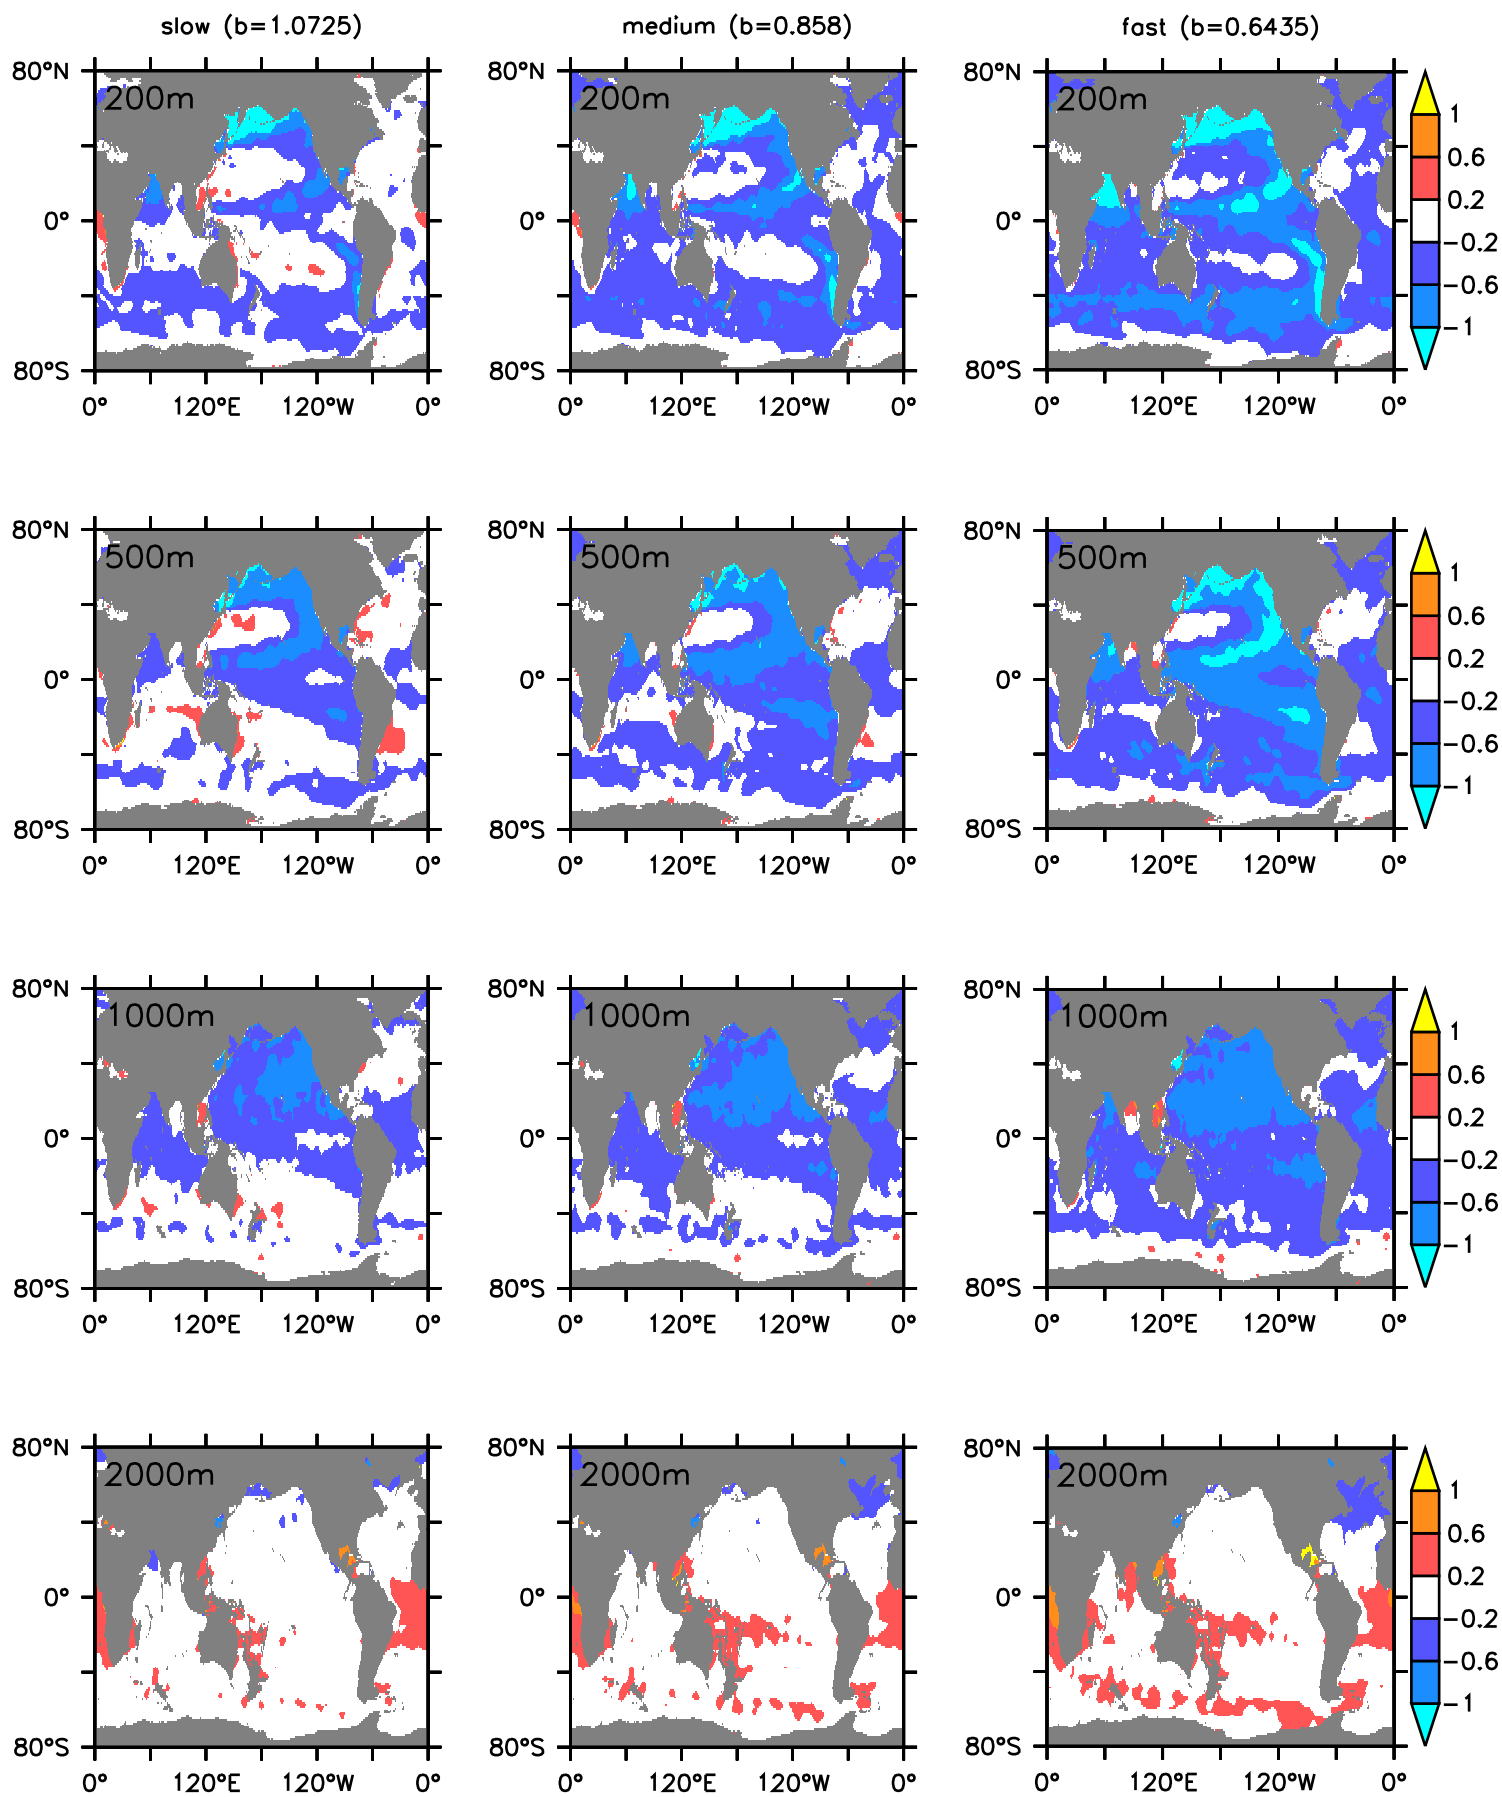

Supplement: Supplementary file 20 [file gmd-8-2929-2015-supplement.zip]

# NFixStoich

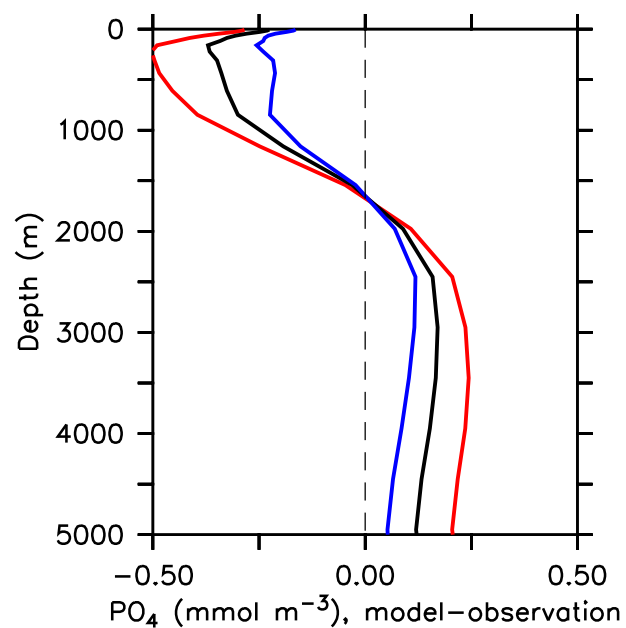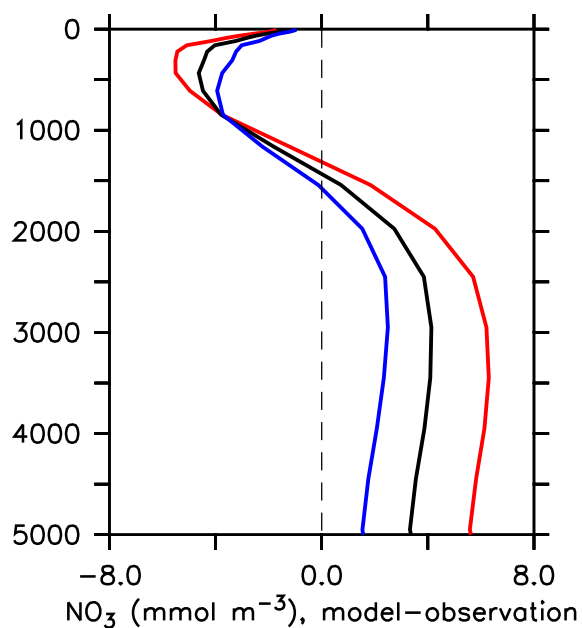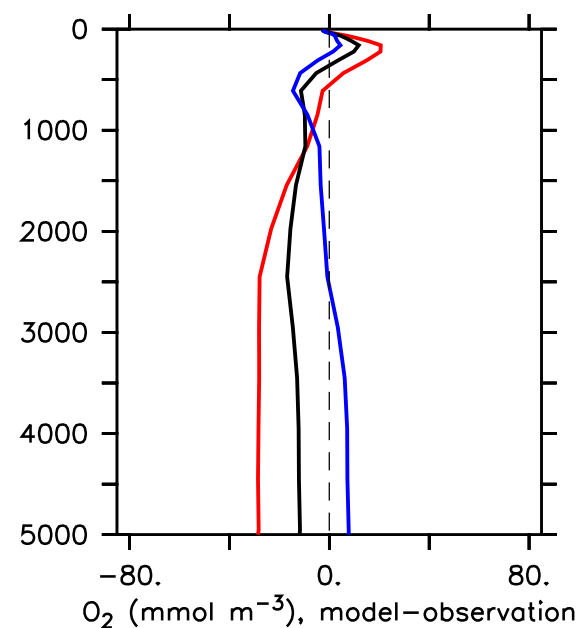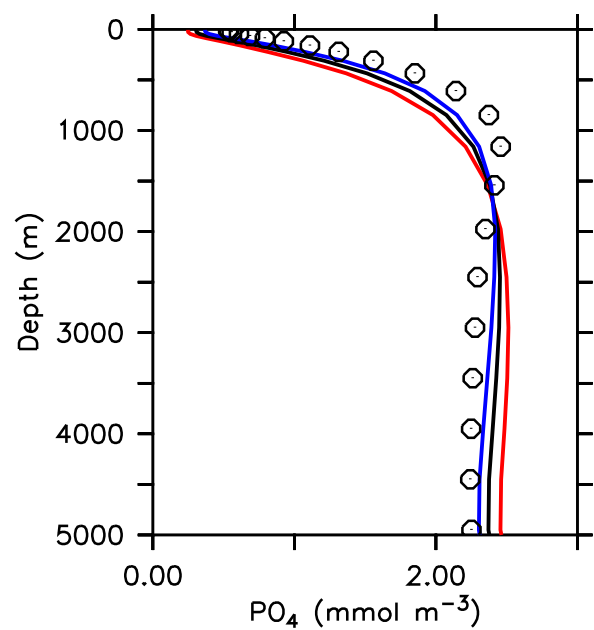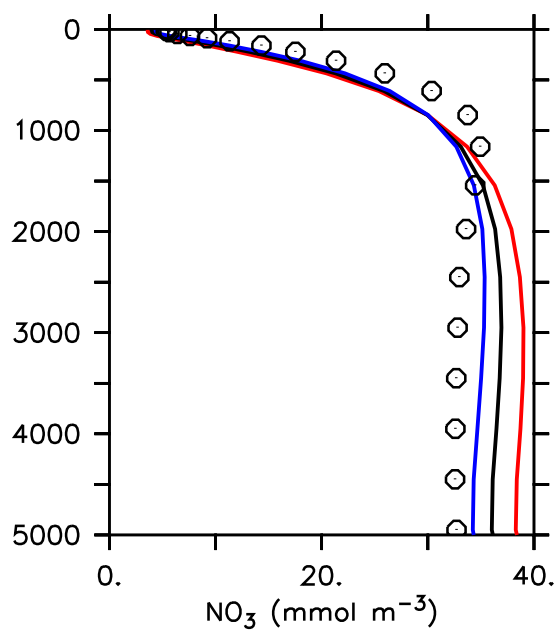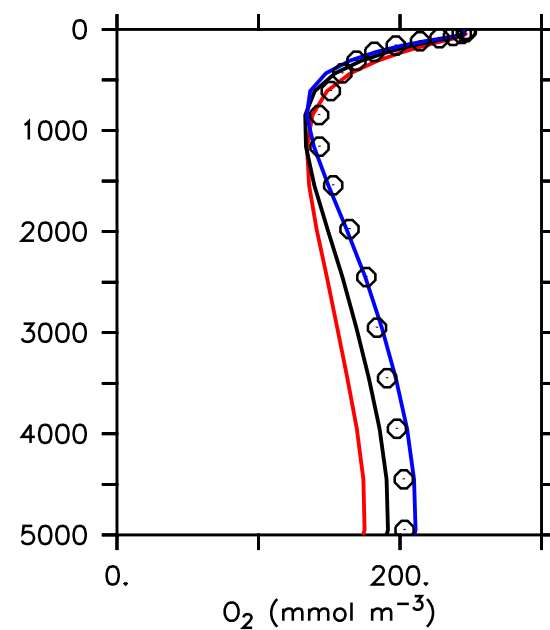

Supplement: Supplementary file 21 [file gmd-8-2929-2015-supplement.zip]

BASE, O<sub>2</sub>, model – obs

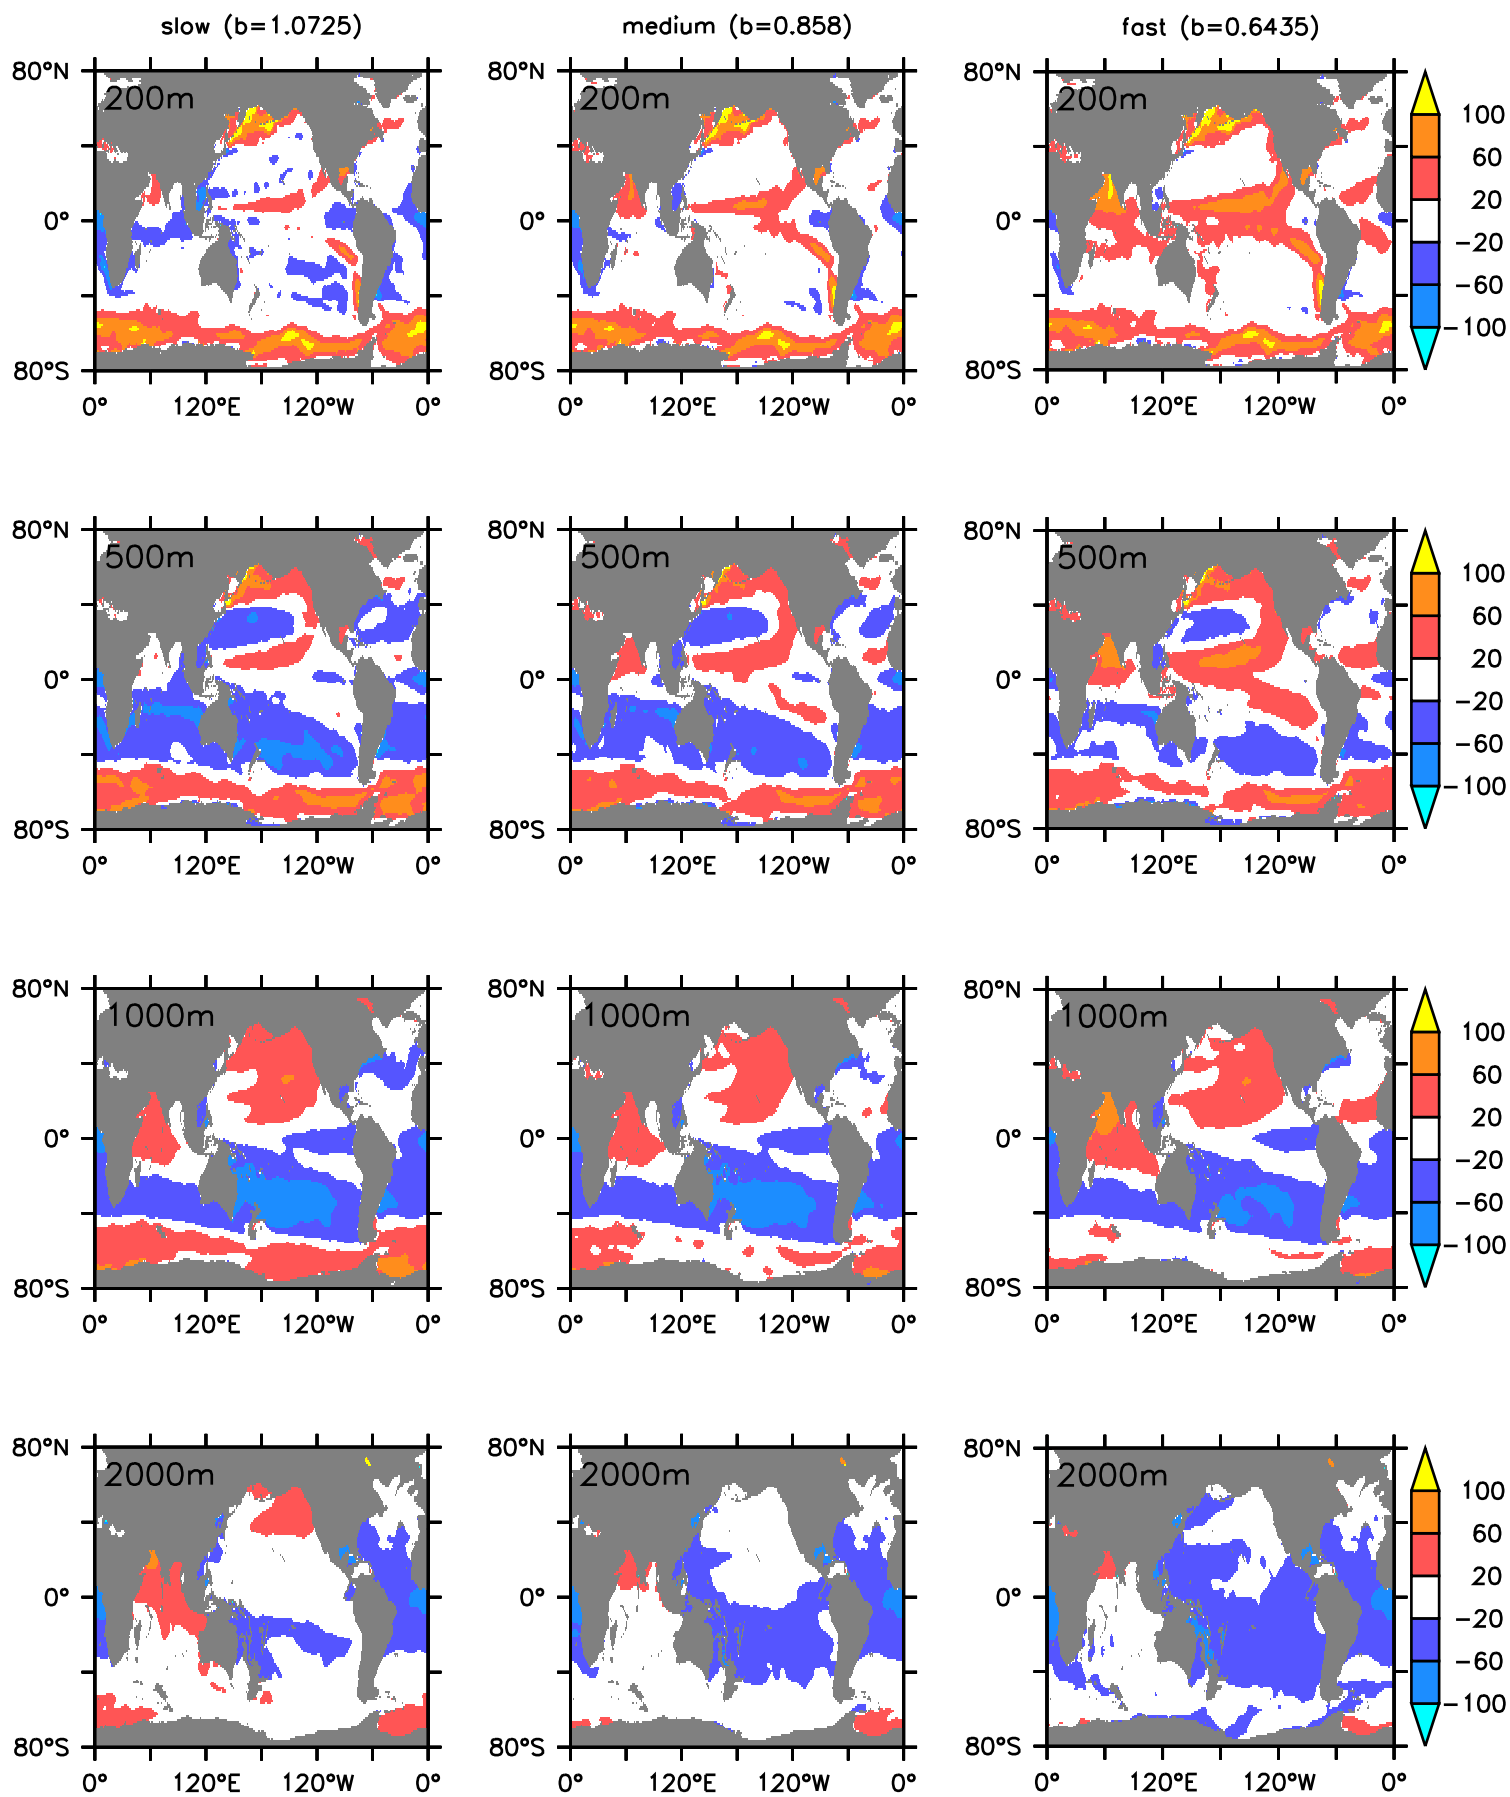

Supplement: Supplementary file 22 [file gmd-8-2929-2015-supplement.zip]

NFixNoTemp, NO<sub>3</sub>, model – obs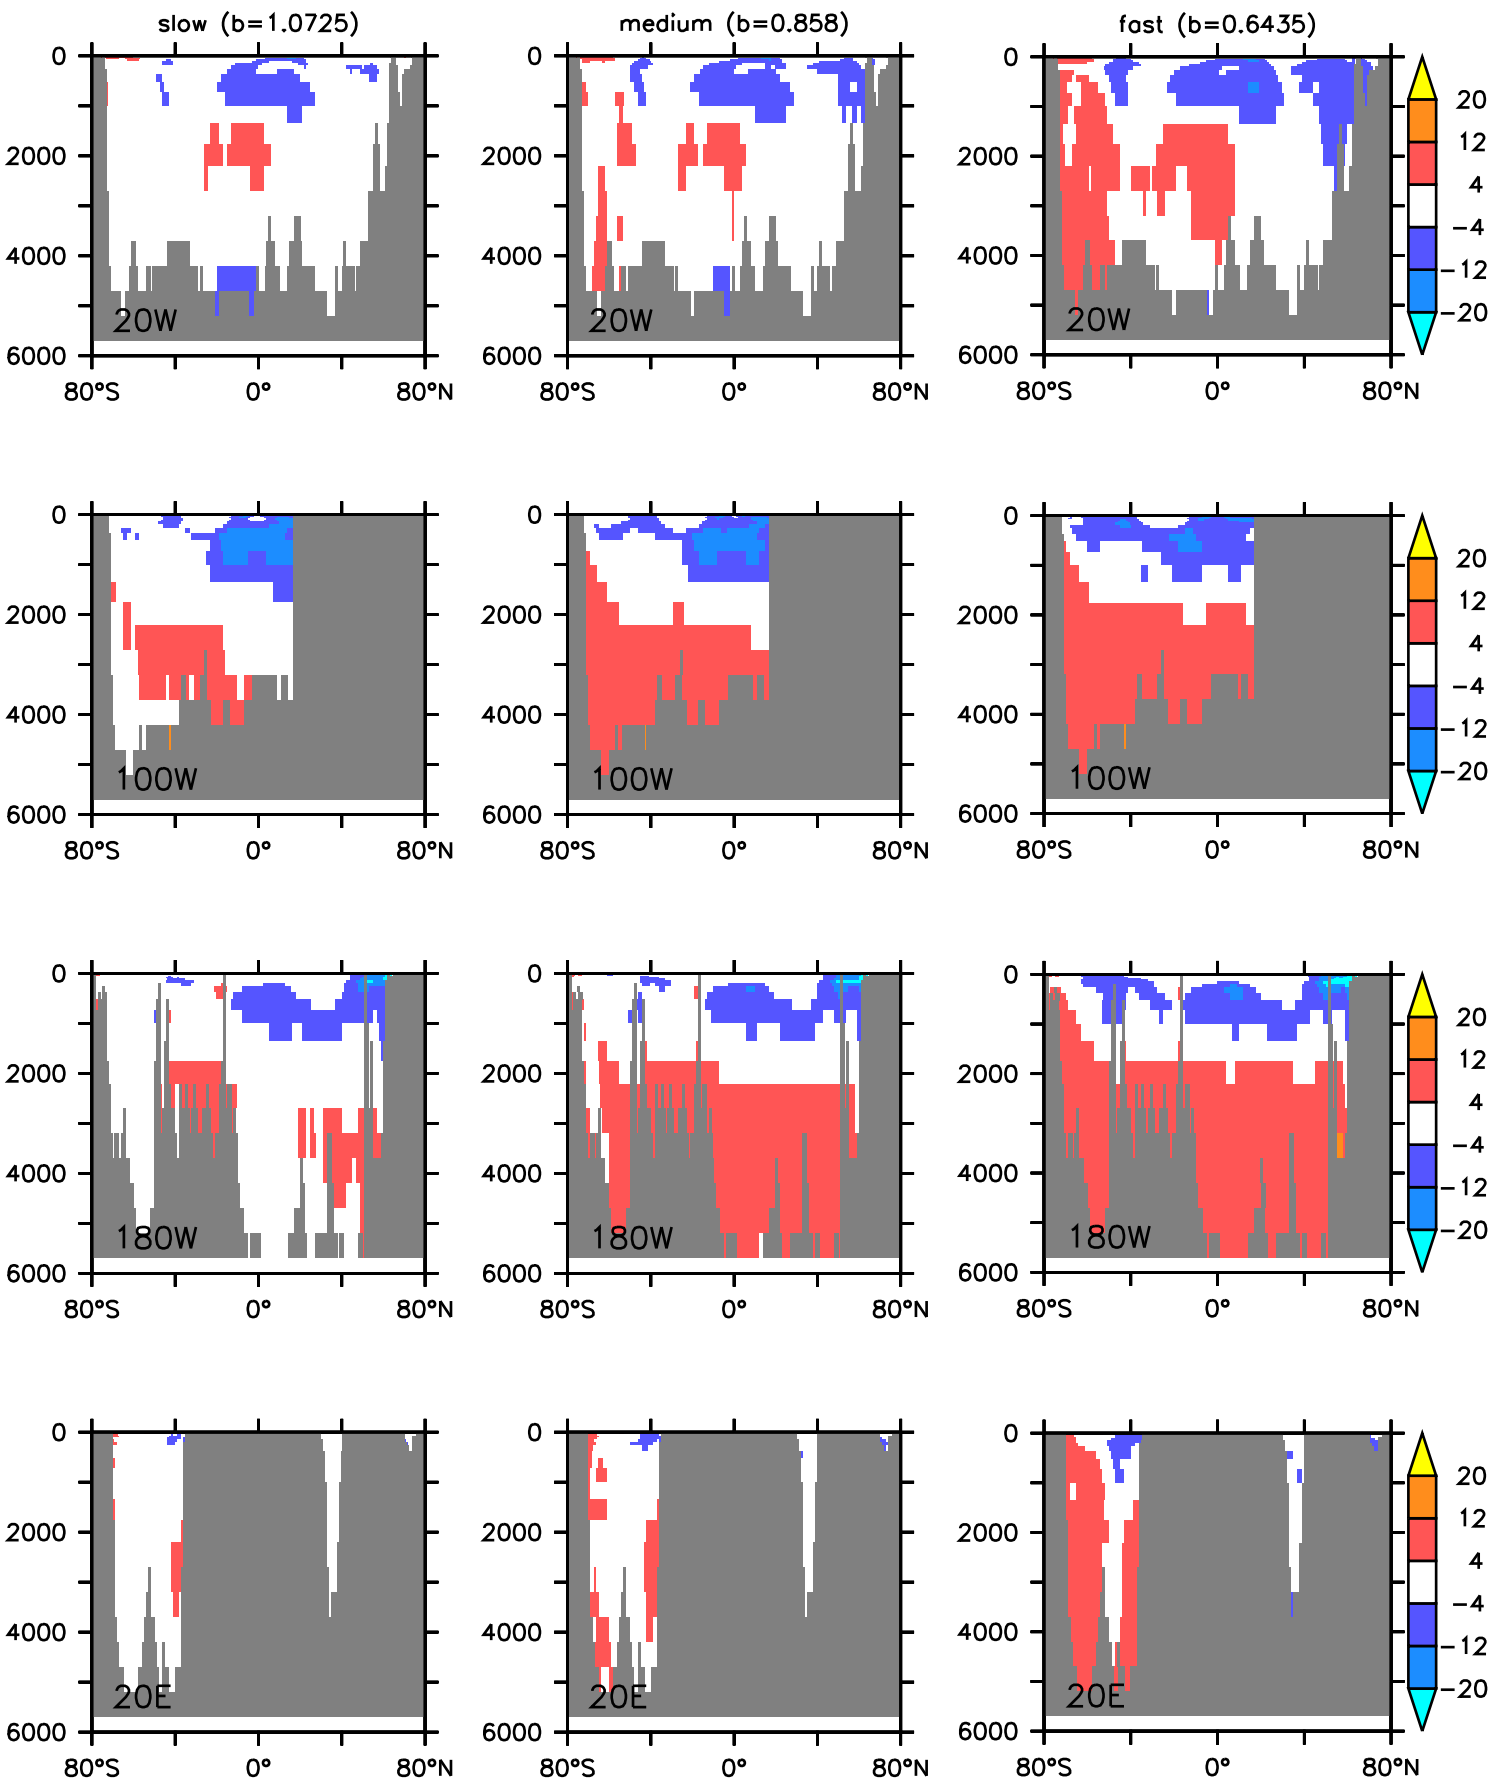

Supplement: Supplementary file 23 [file gmd-8-2929-2015-supplement.zip]

BASE, PO<sub>4</sub>, model – obs

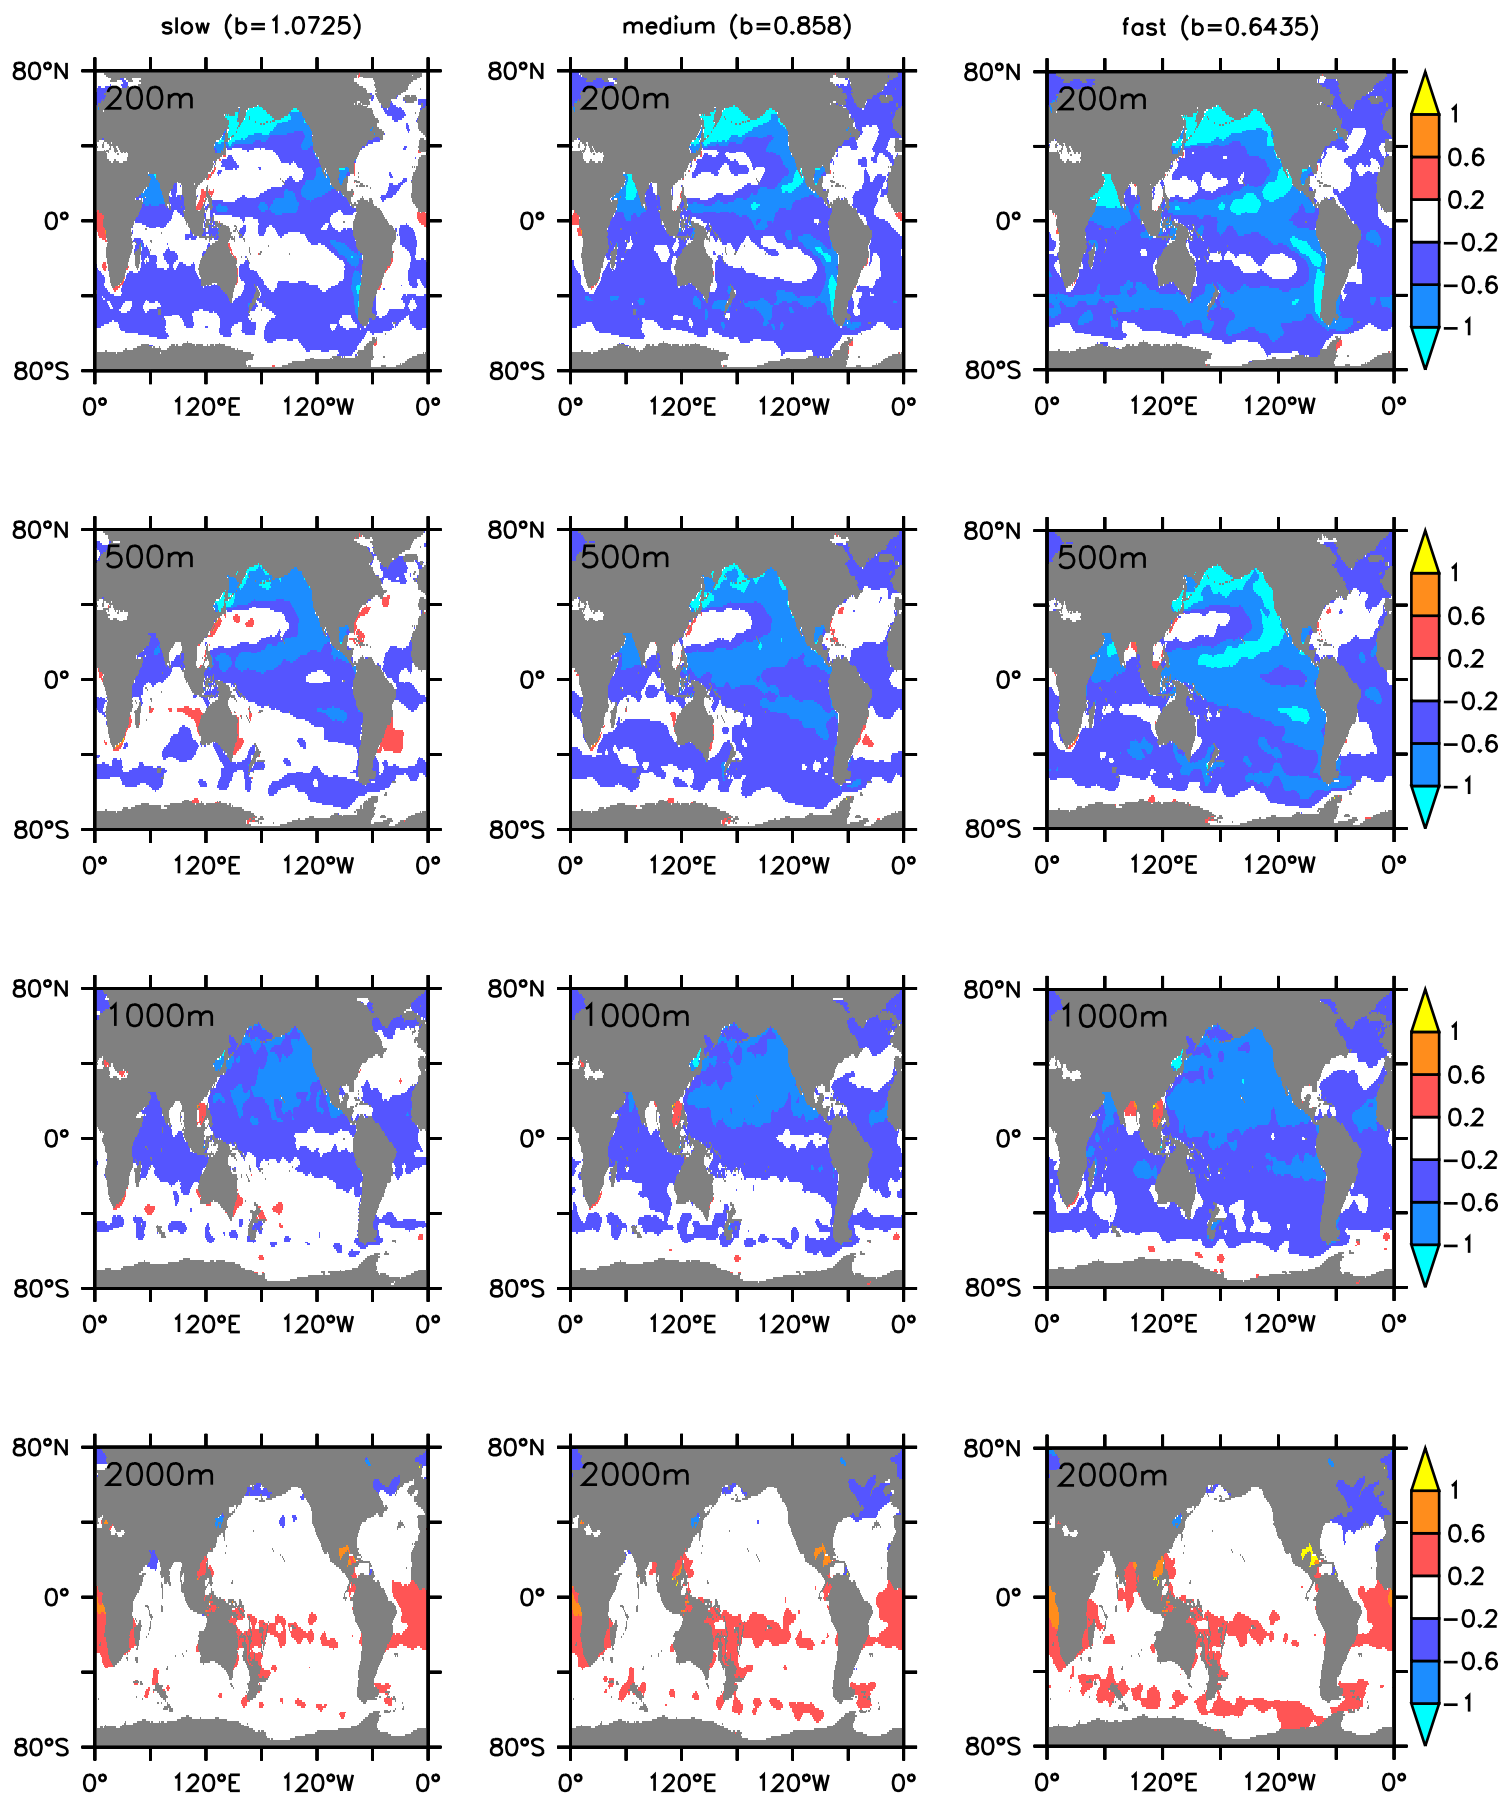

Supplement: Supplementary file 24 [file gmd-8-2929-2015-supplement.zip]

BASE, O<sub>2</sub>, model – obs

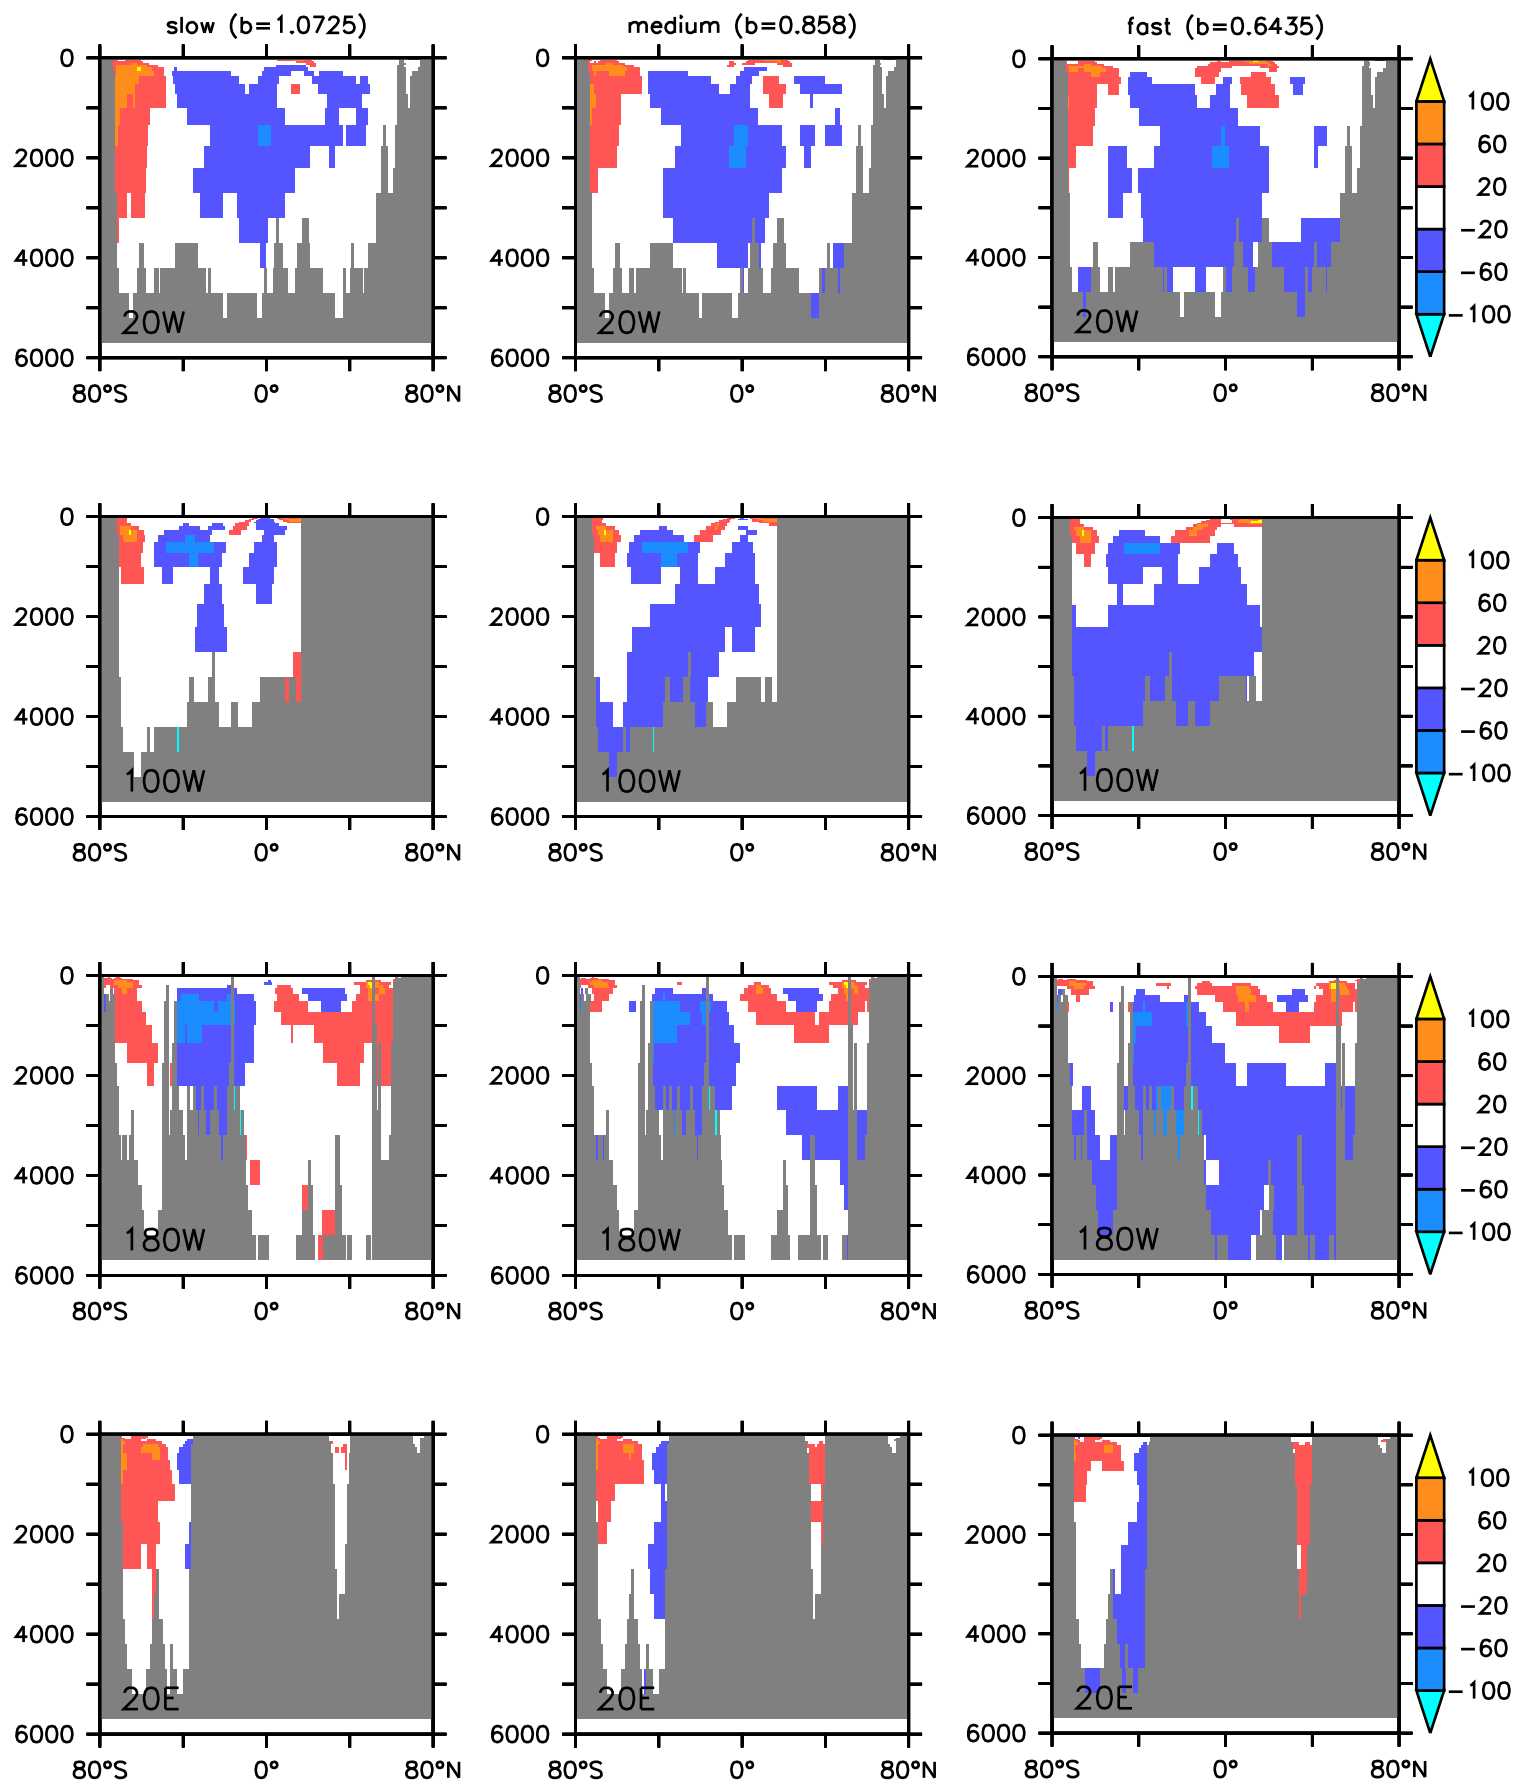

Supplement: Supplementary file 25 [file gmd-8-2929-2015-supplement.zip]

# NFixNoTemp, O<sub>2</sub>, model - obs

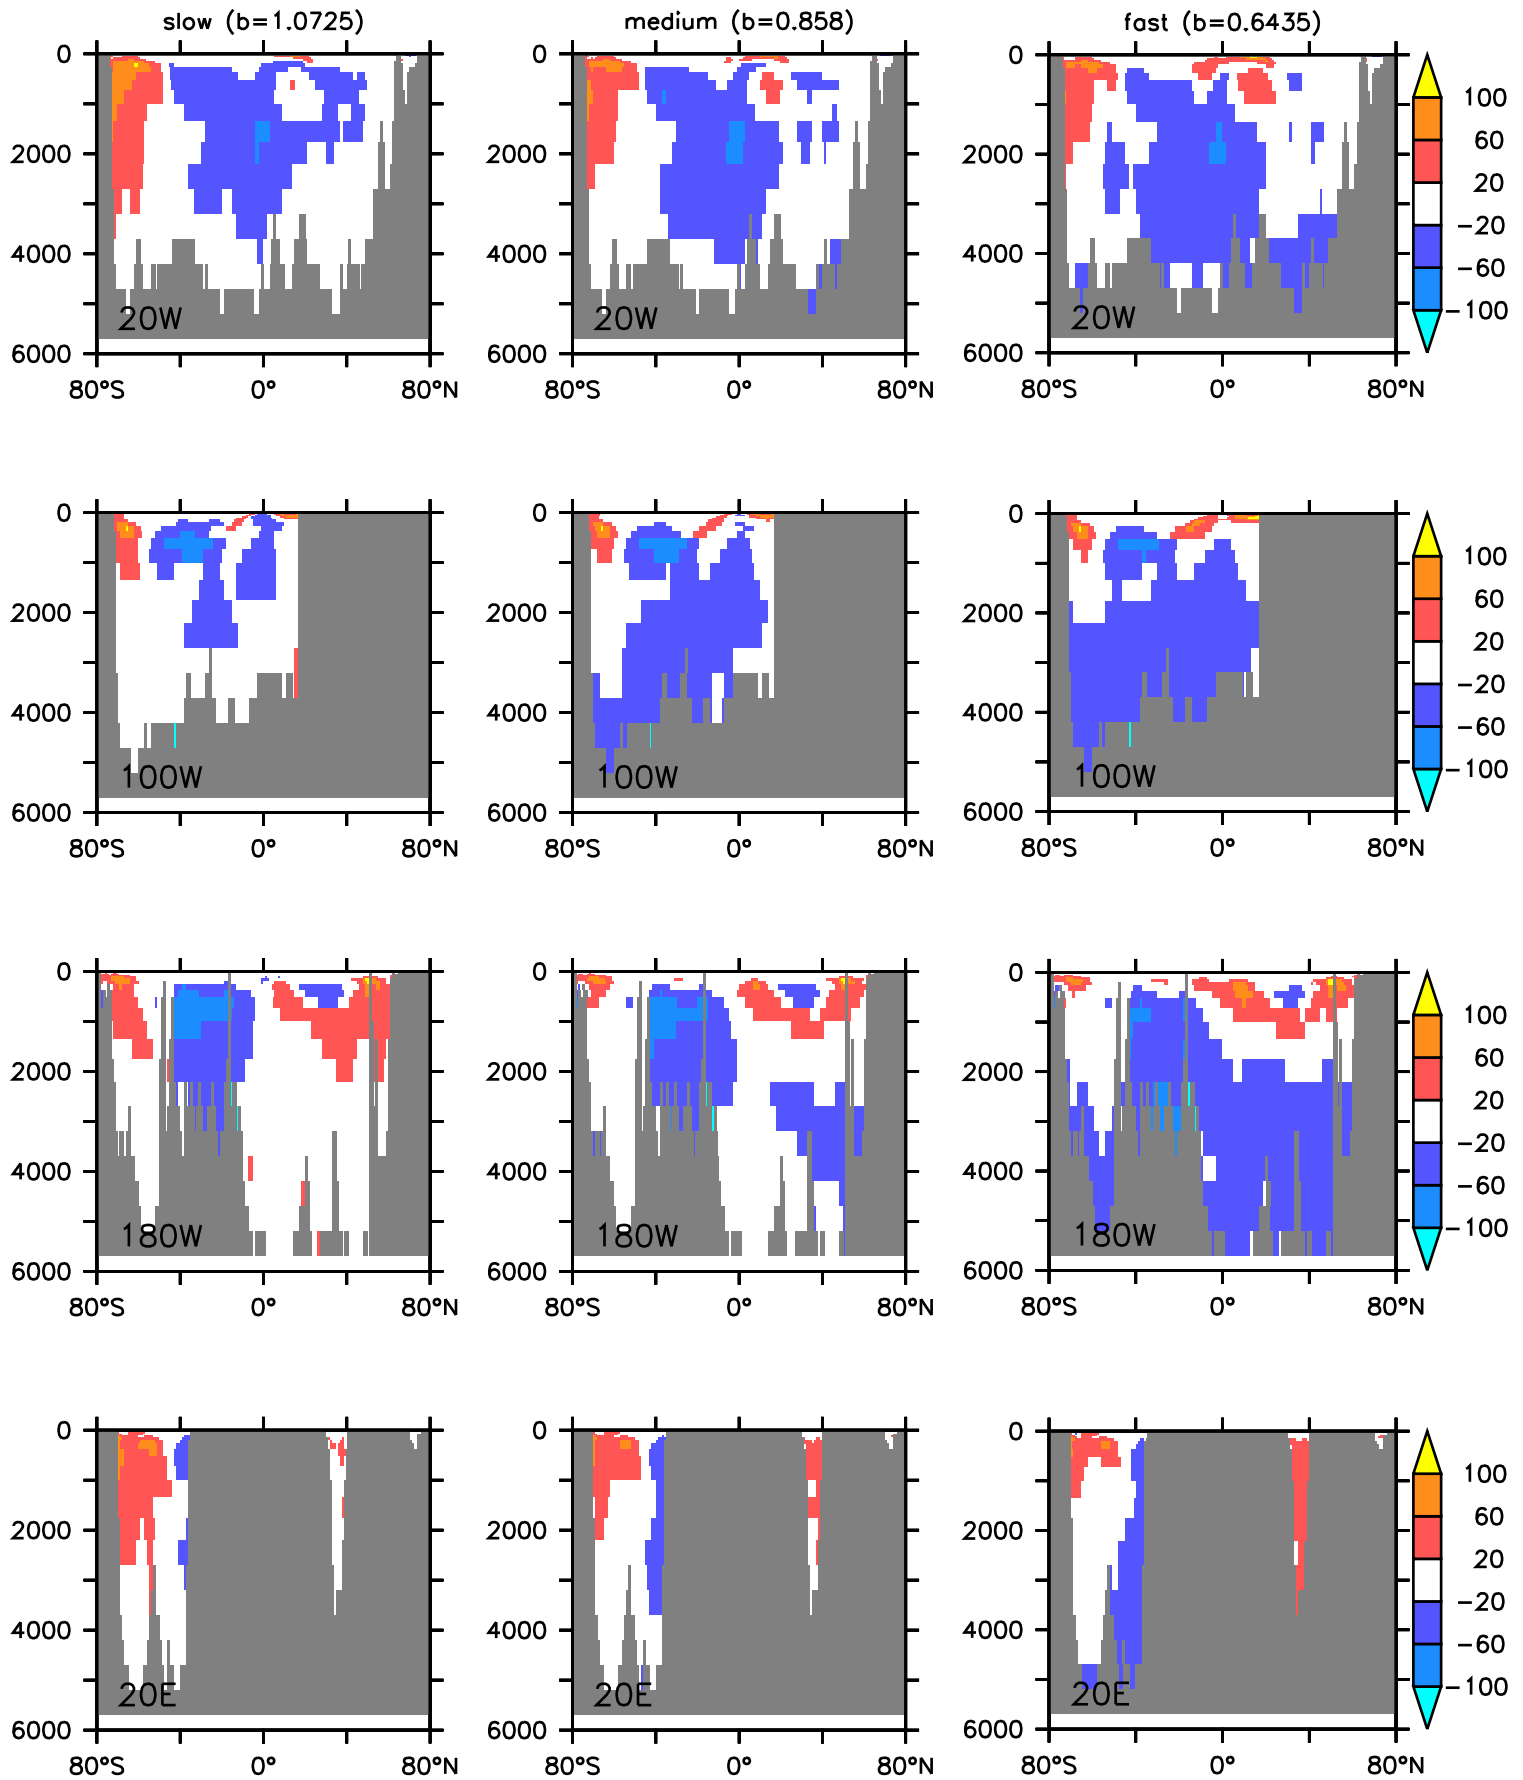

Supplement: Supplementary file 26 [file gmd-8-2929-2015-supplement.zip]

DenHigh, O<sub>2</sub>, model – obs

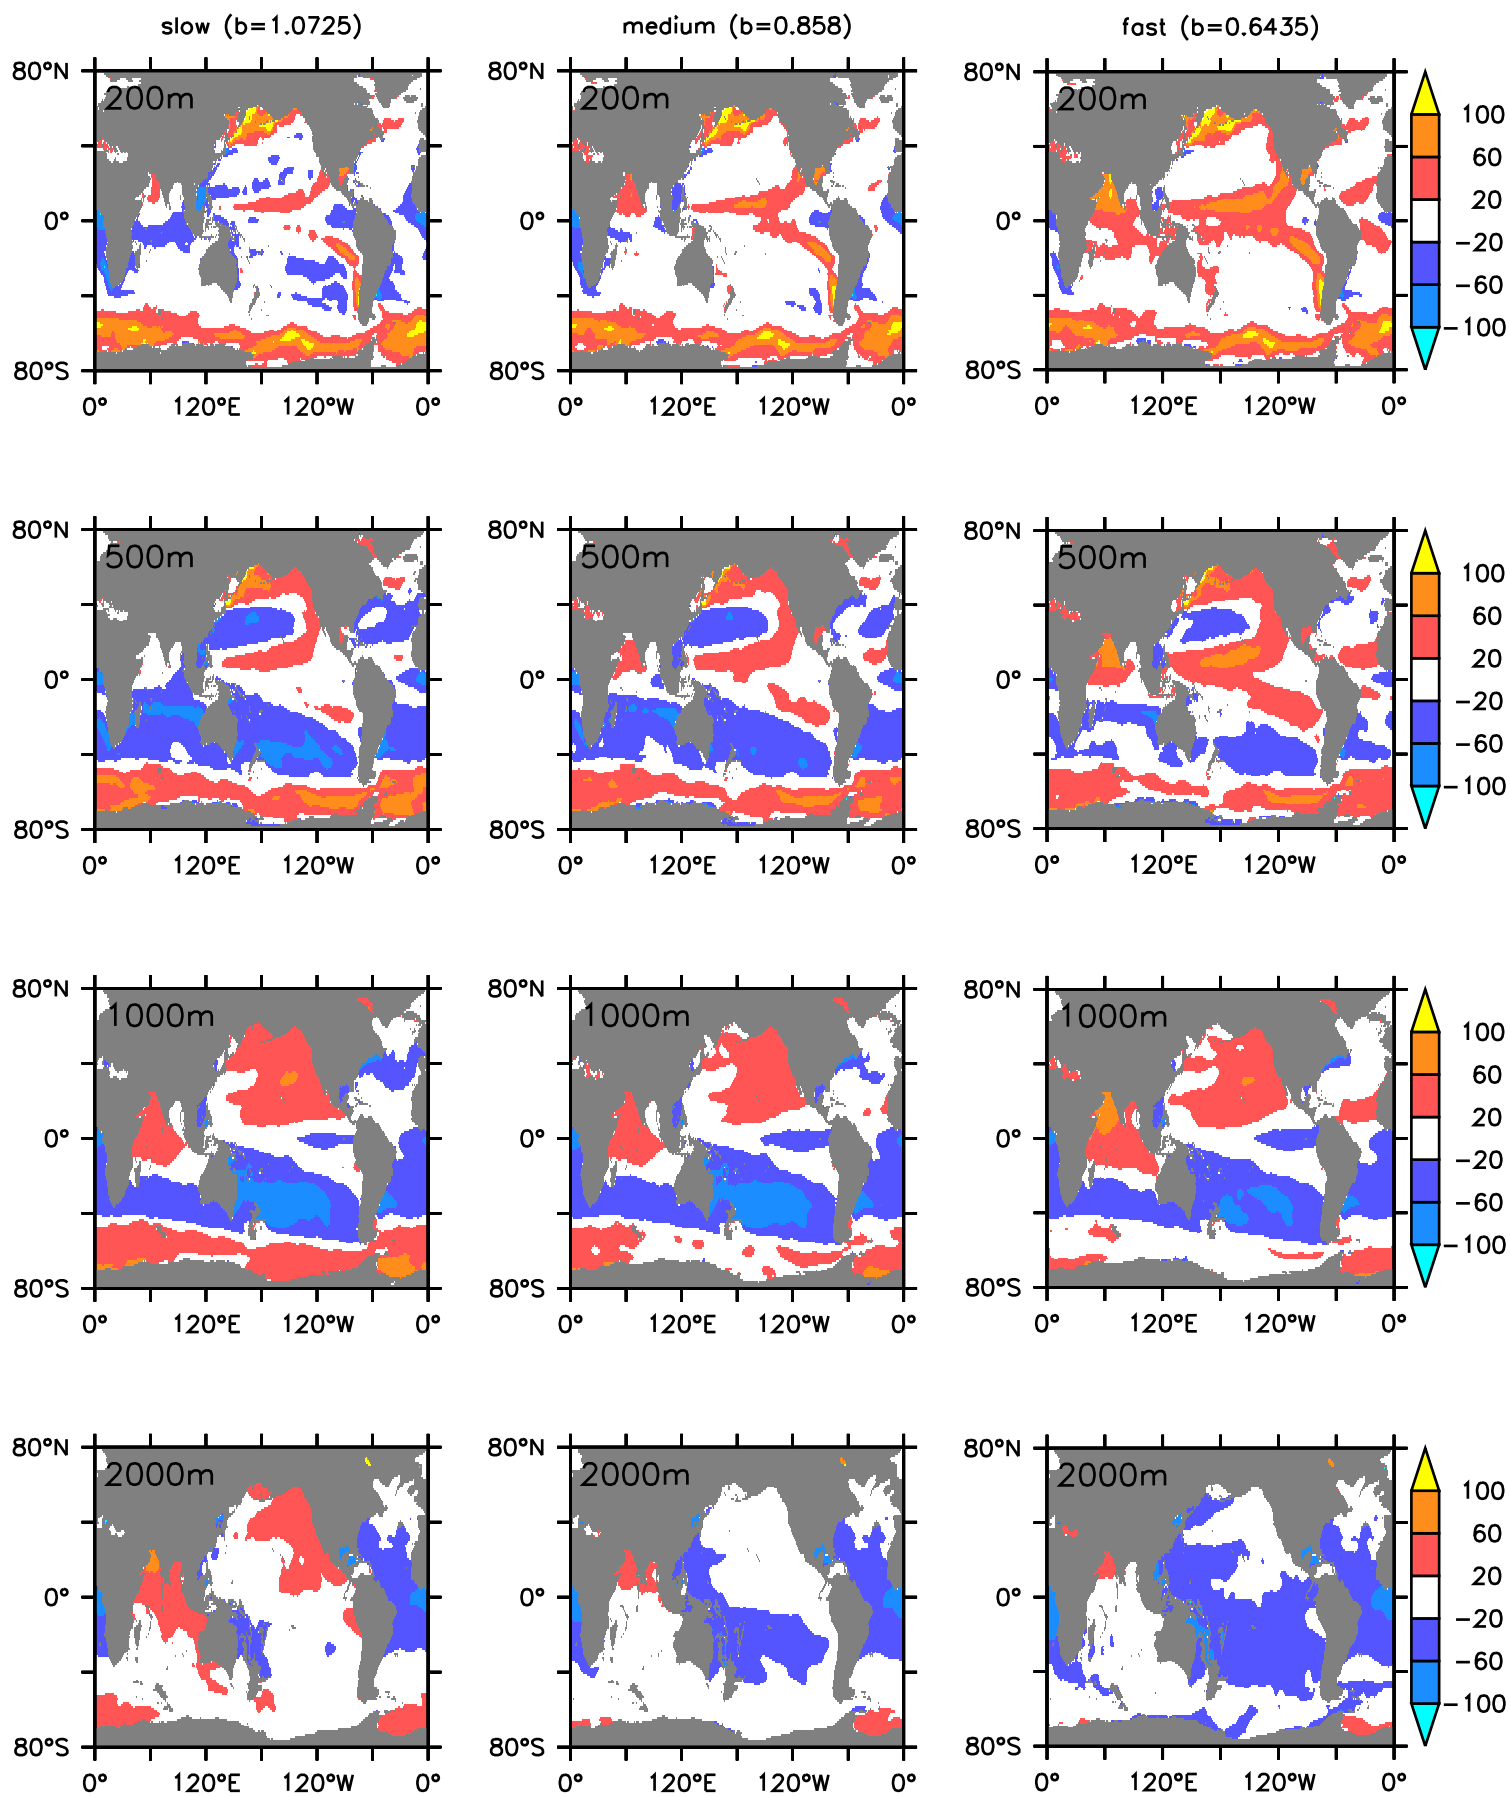

Supplement: Supplementary file 27 [file gmd-8-2929-2015-supplement.zip]

BASE, PO<sub>4</sub>, model – obs

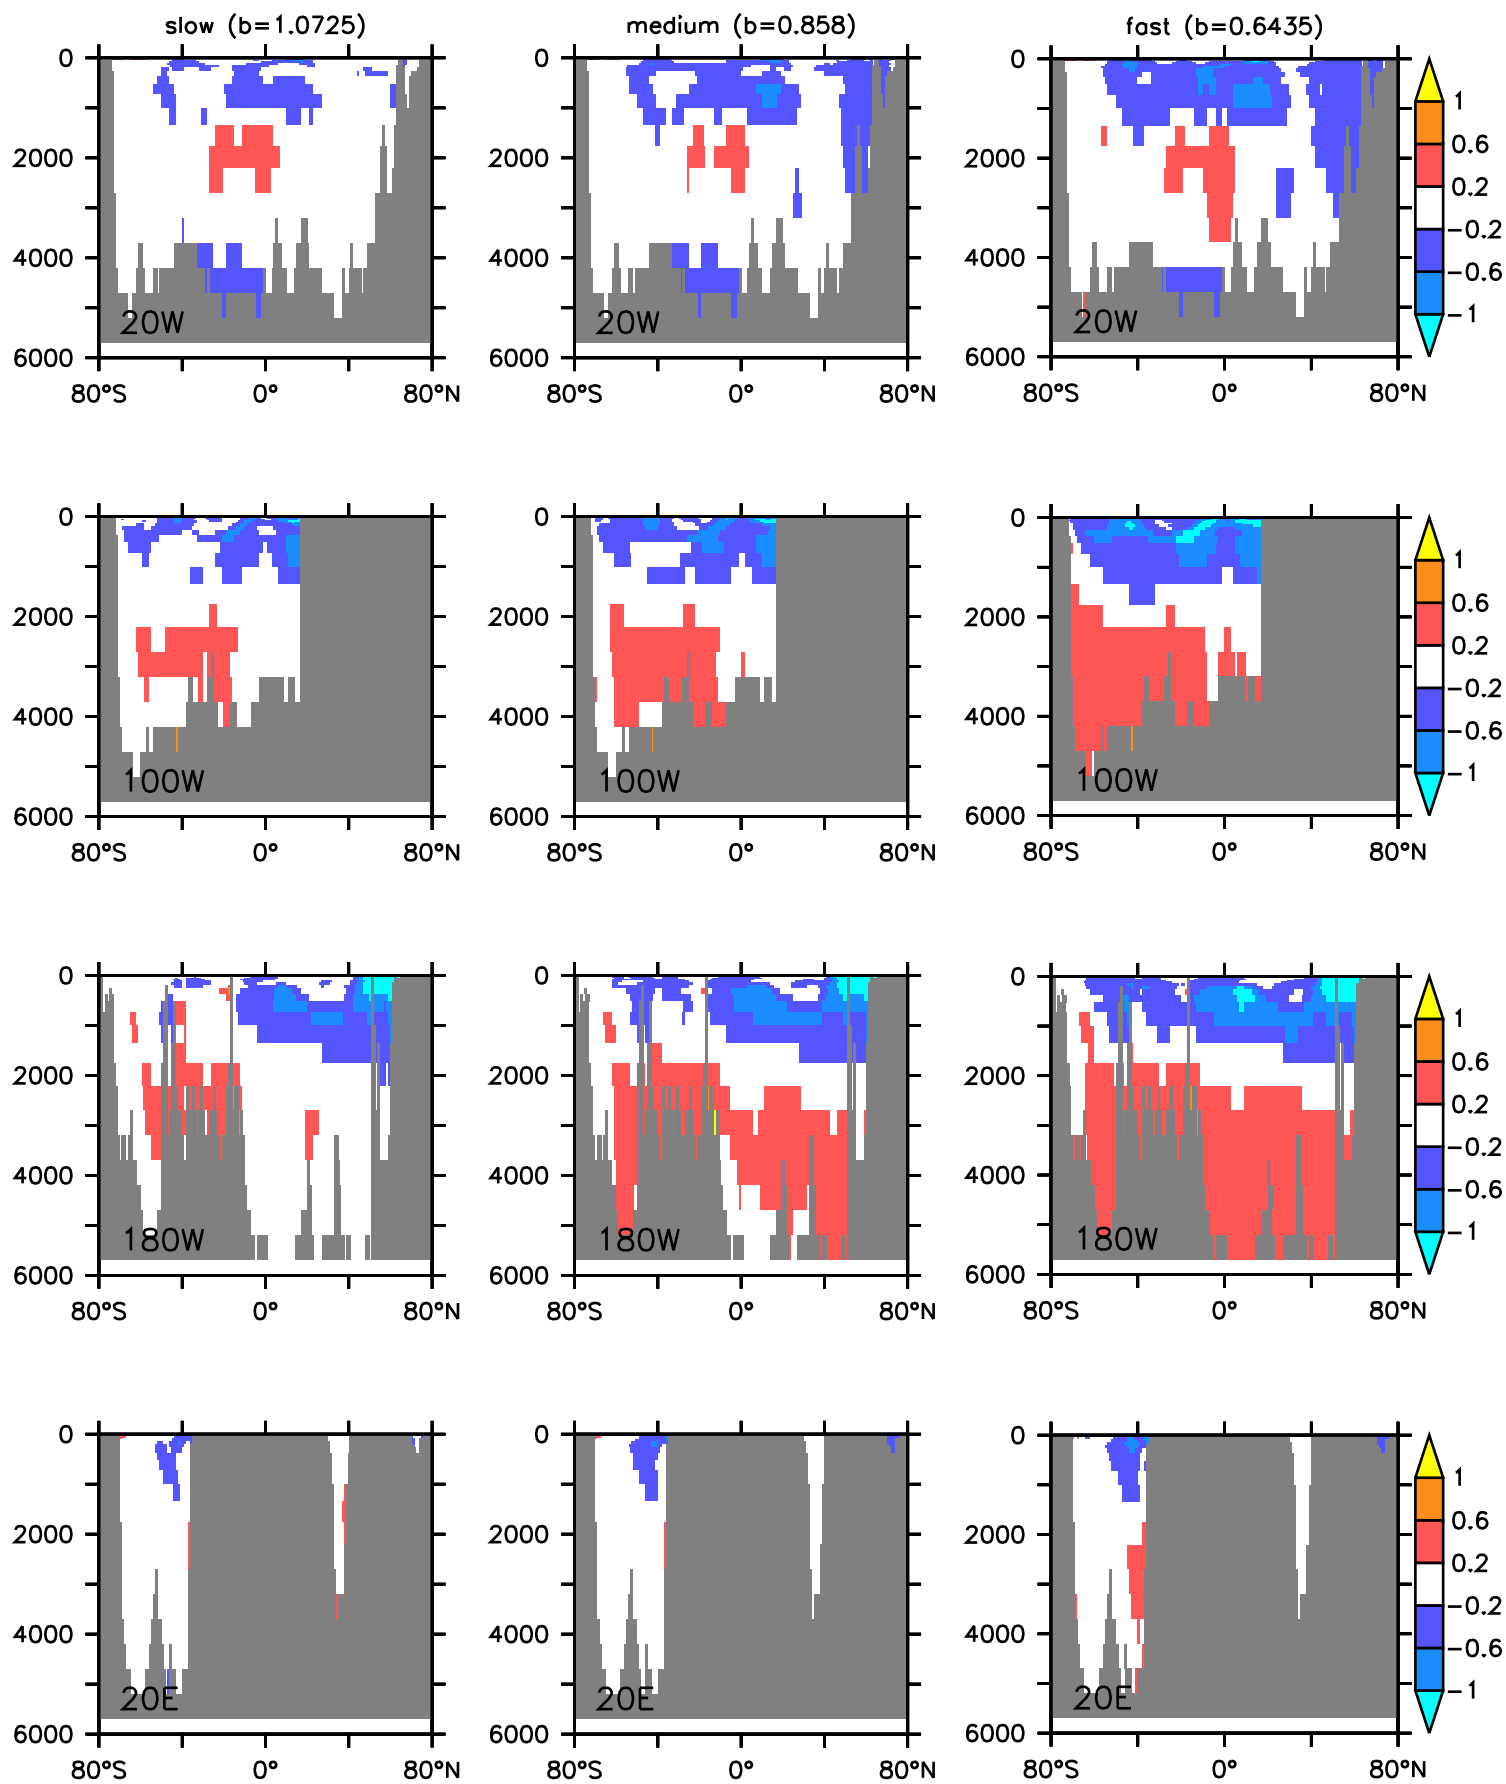

Supplement: Supplementary file 28 [file gmd-8-2929-2015-supplement.zip]

# NFixNoTemp, PO<sub>4</sub>, model – obs

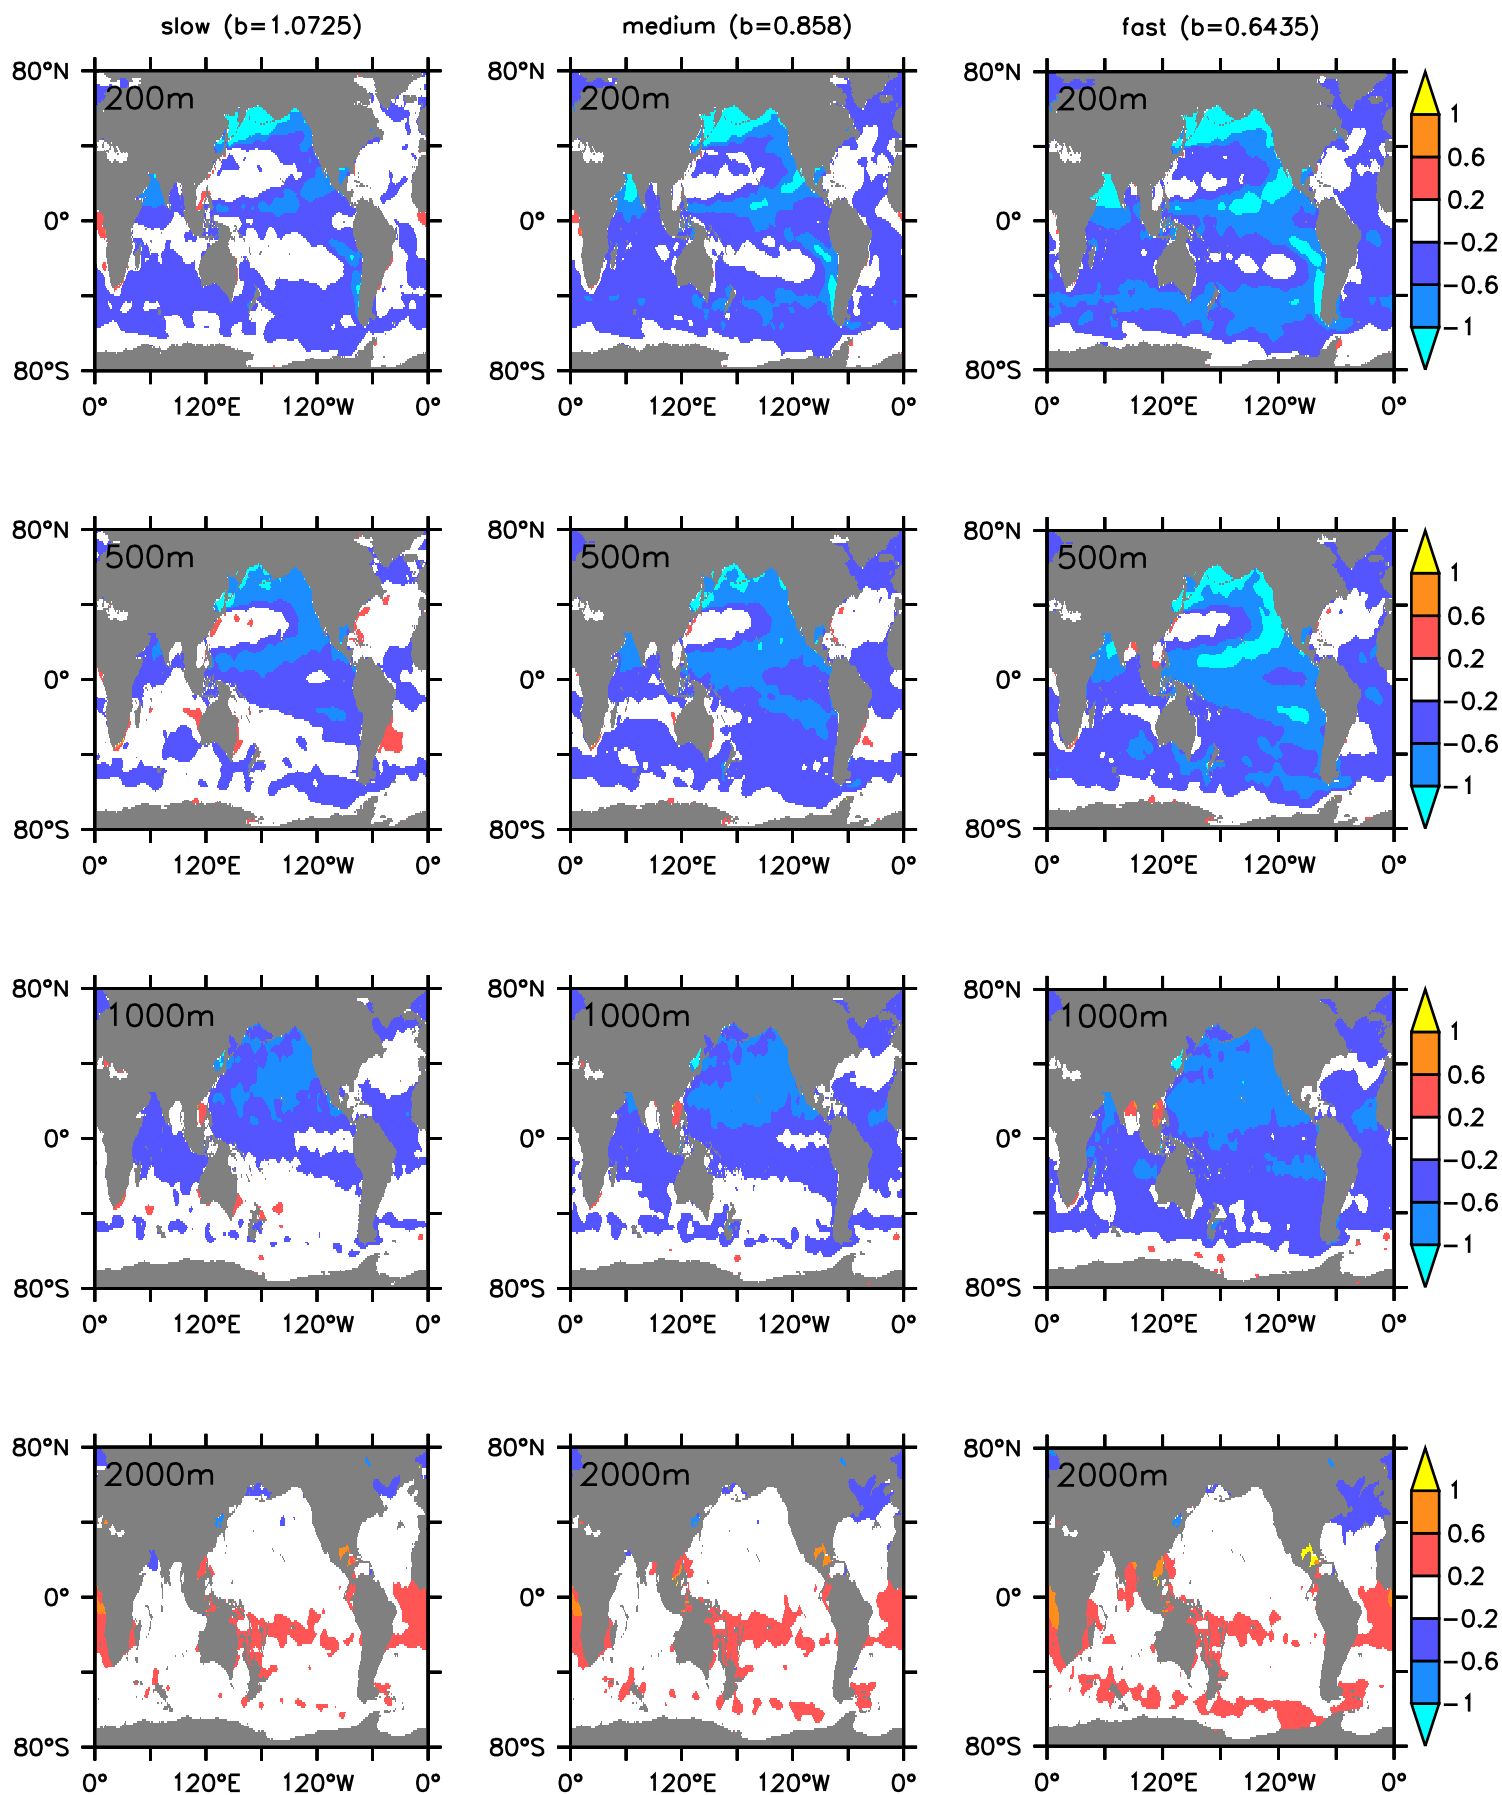

Supplement: Supplementary file 29 [file gmd-8-2929-2015-supplement.zip]

# NFixStoich, O<sub>2</sub>, model – obs

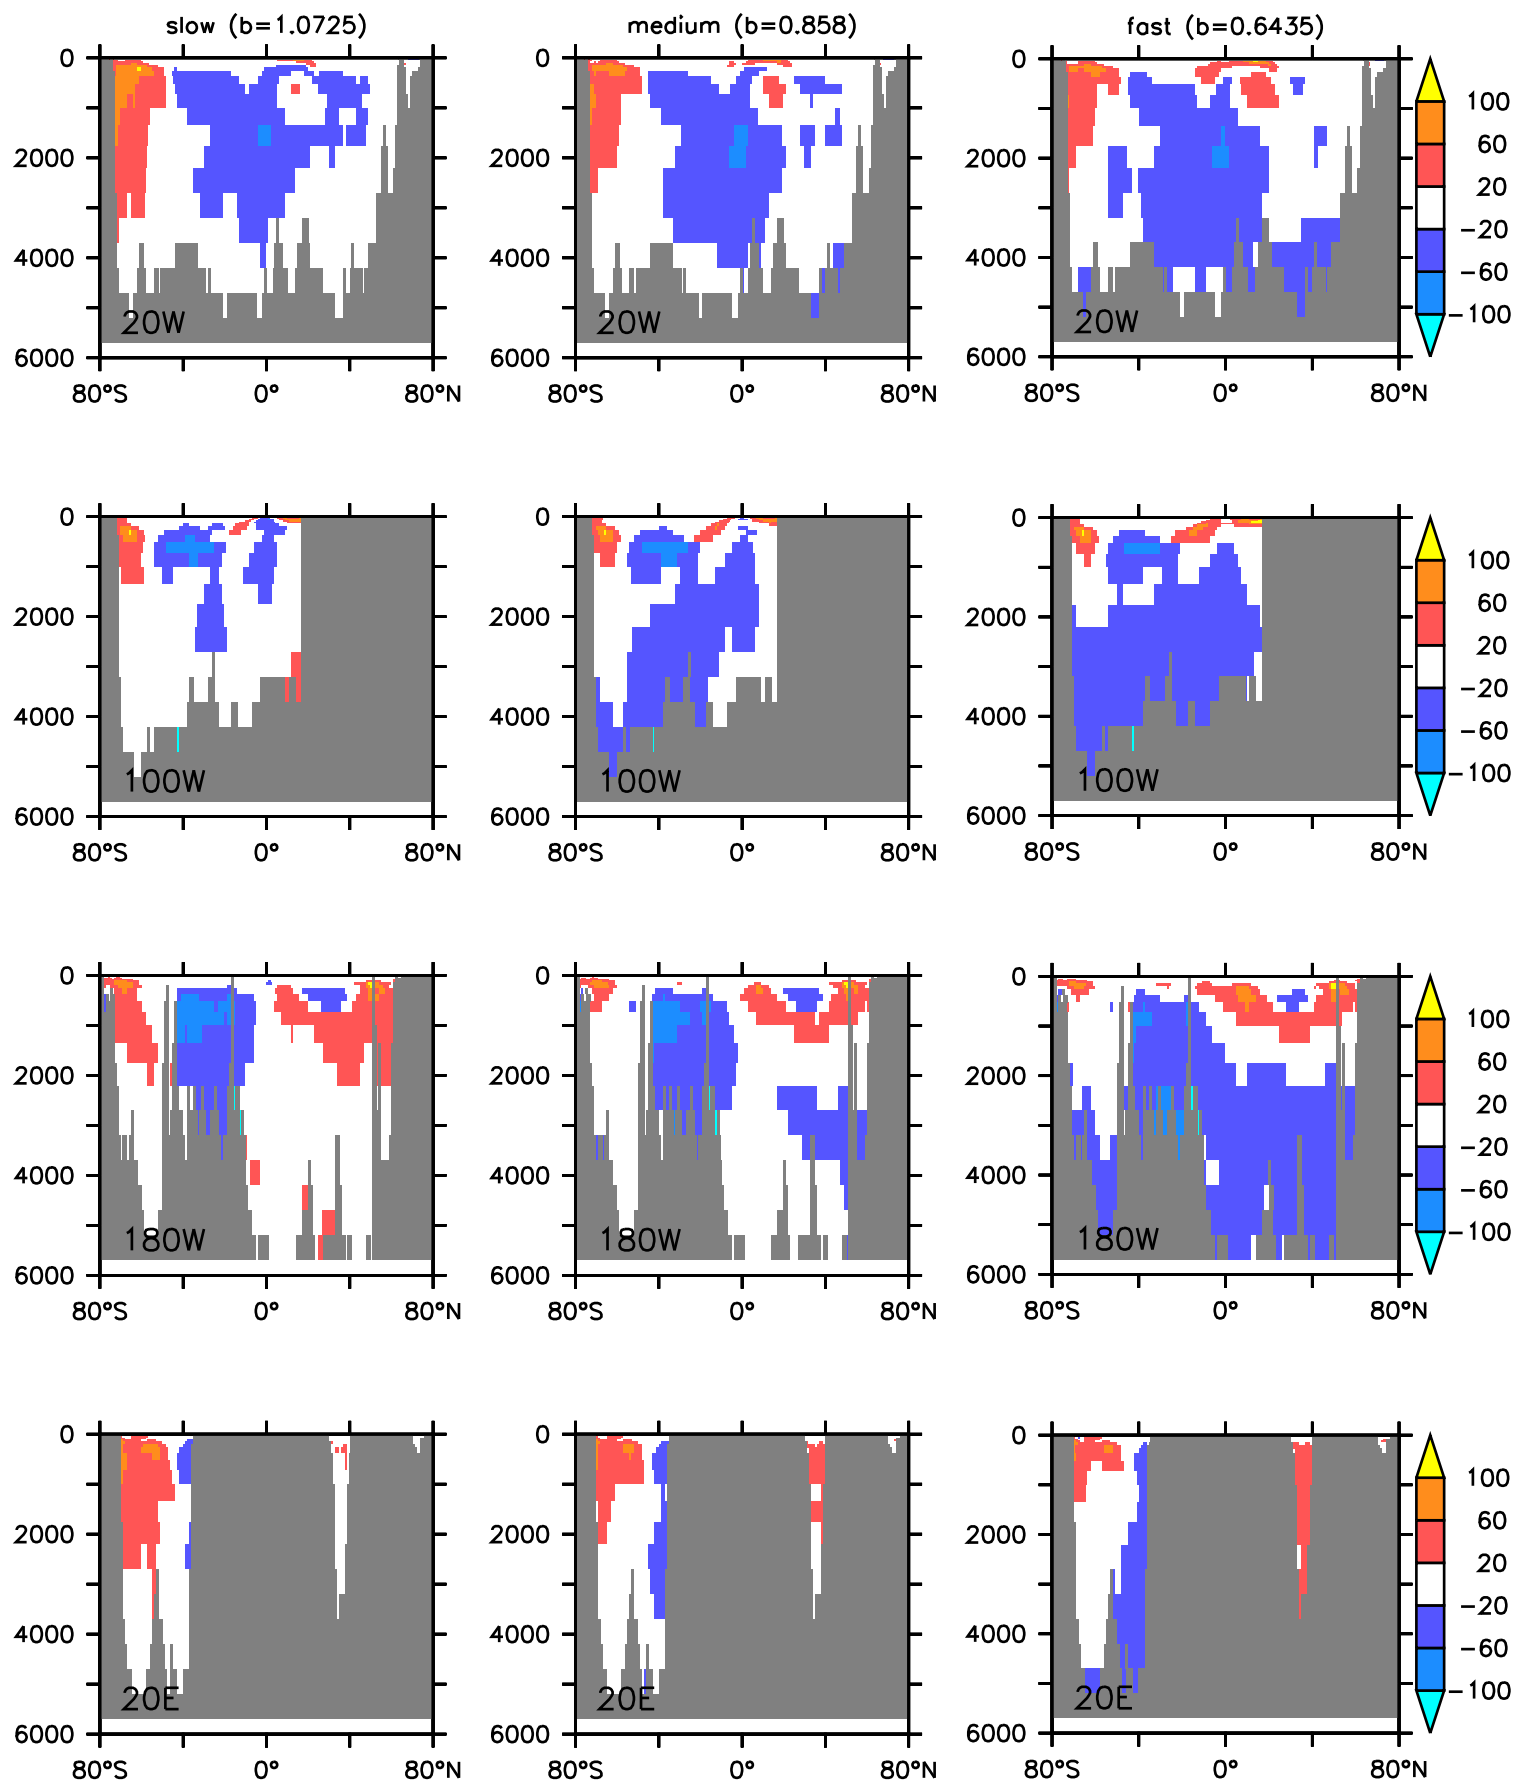

Supplement: Supplementary file 30 [file gmd-8-2929-2015-supplement.zip]

# NFixNoTemp, PO<sub>4</sub>, model - obs

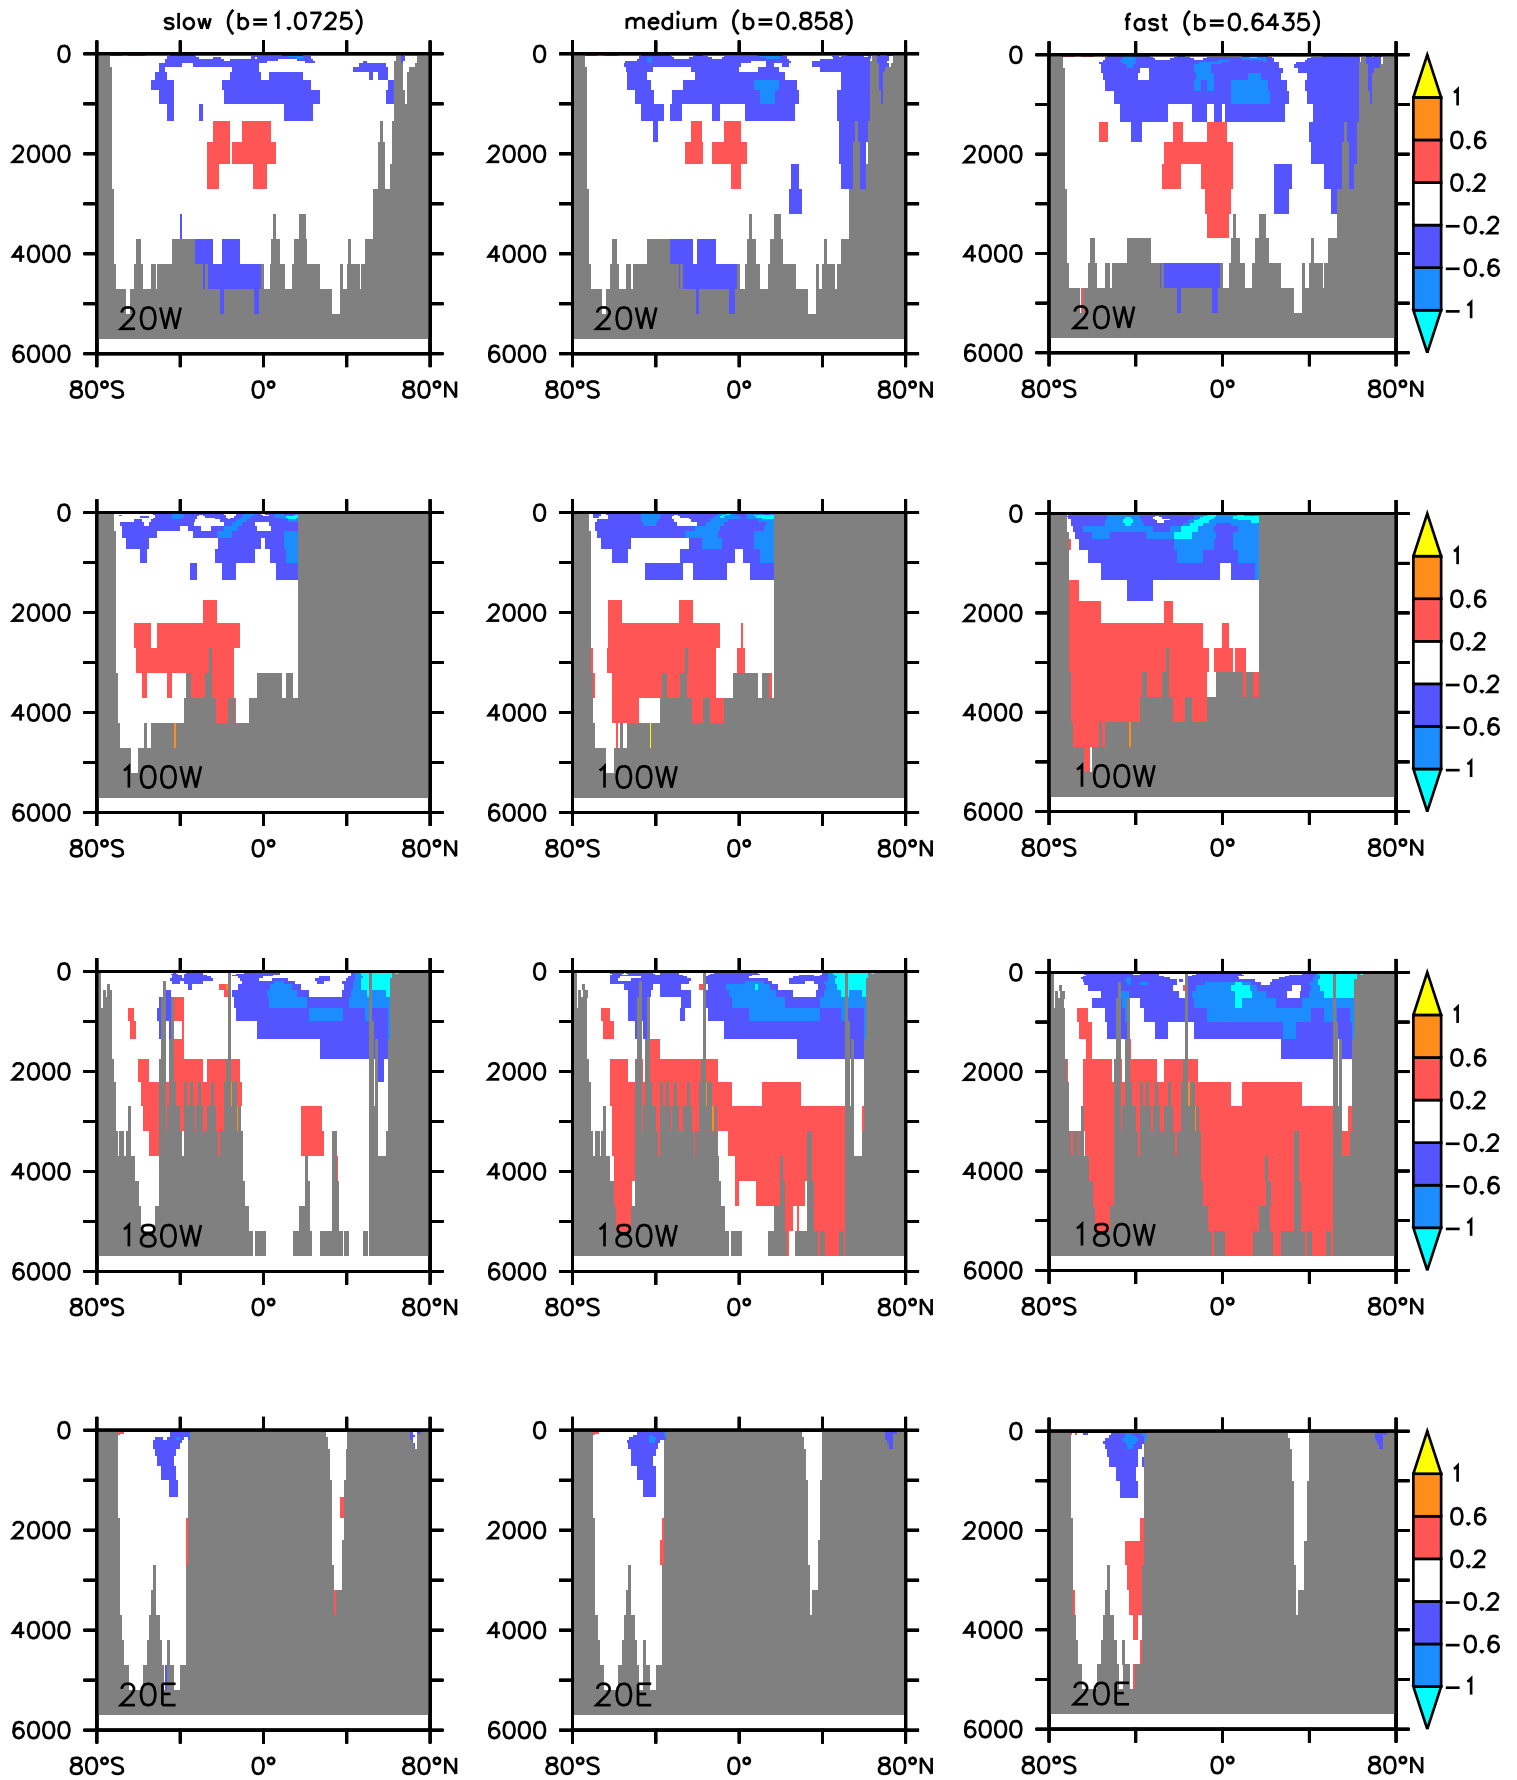

Supplement: Supplementary file 31 [file gmd-8-2929-2015-supplement.zip]

DenHigh, O<sub>2</sub>, model – obs

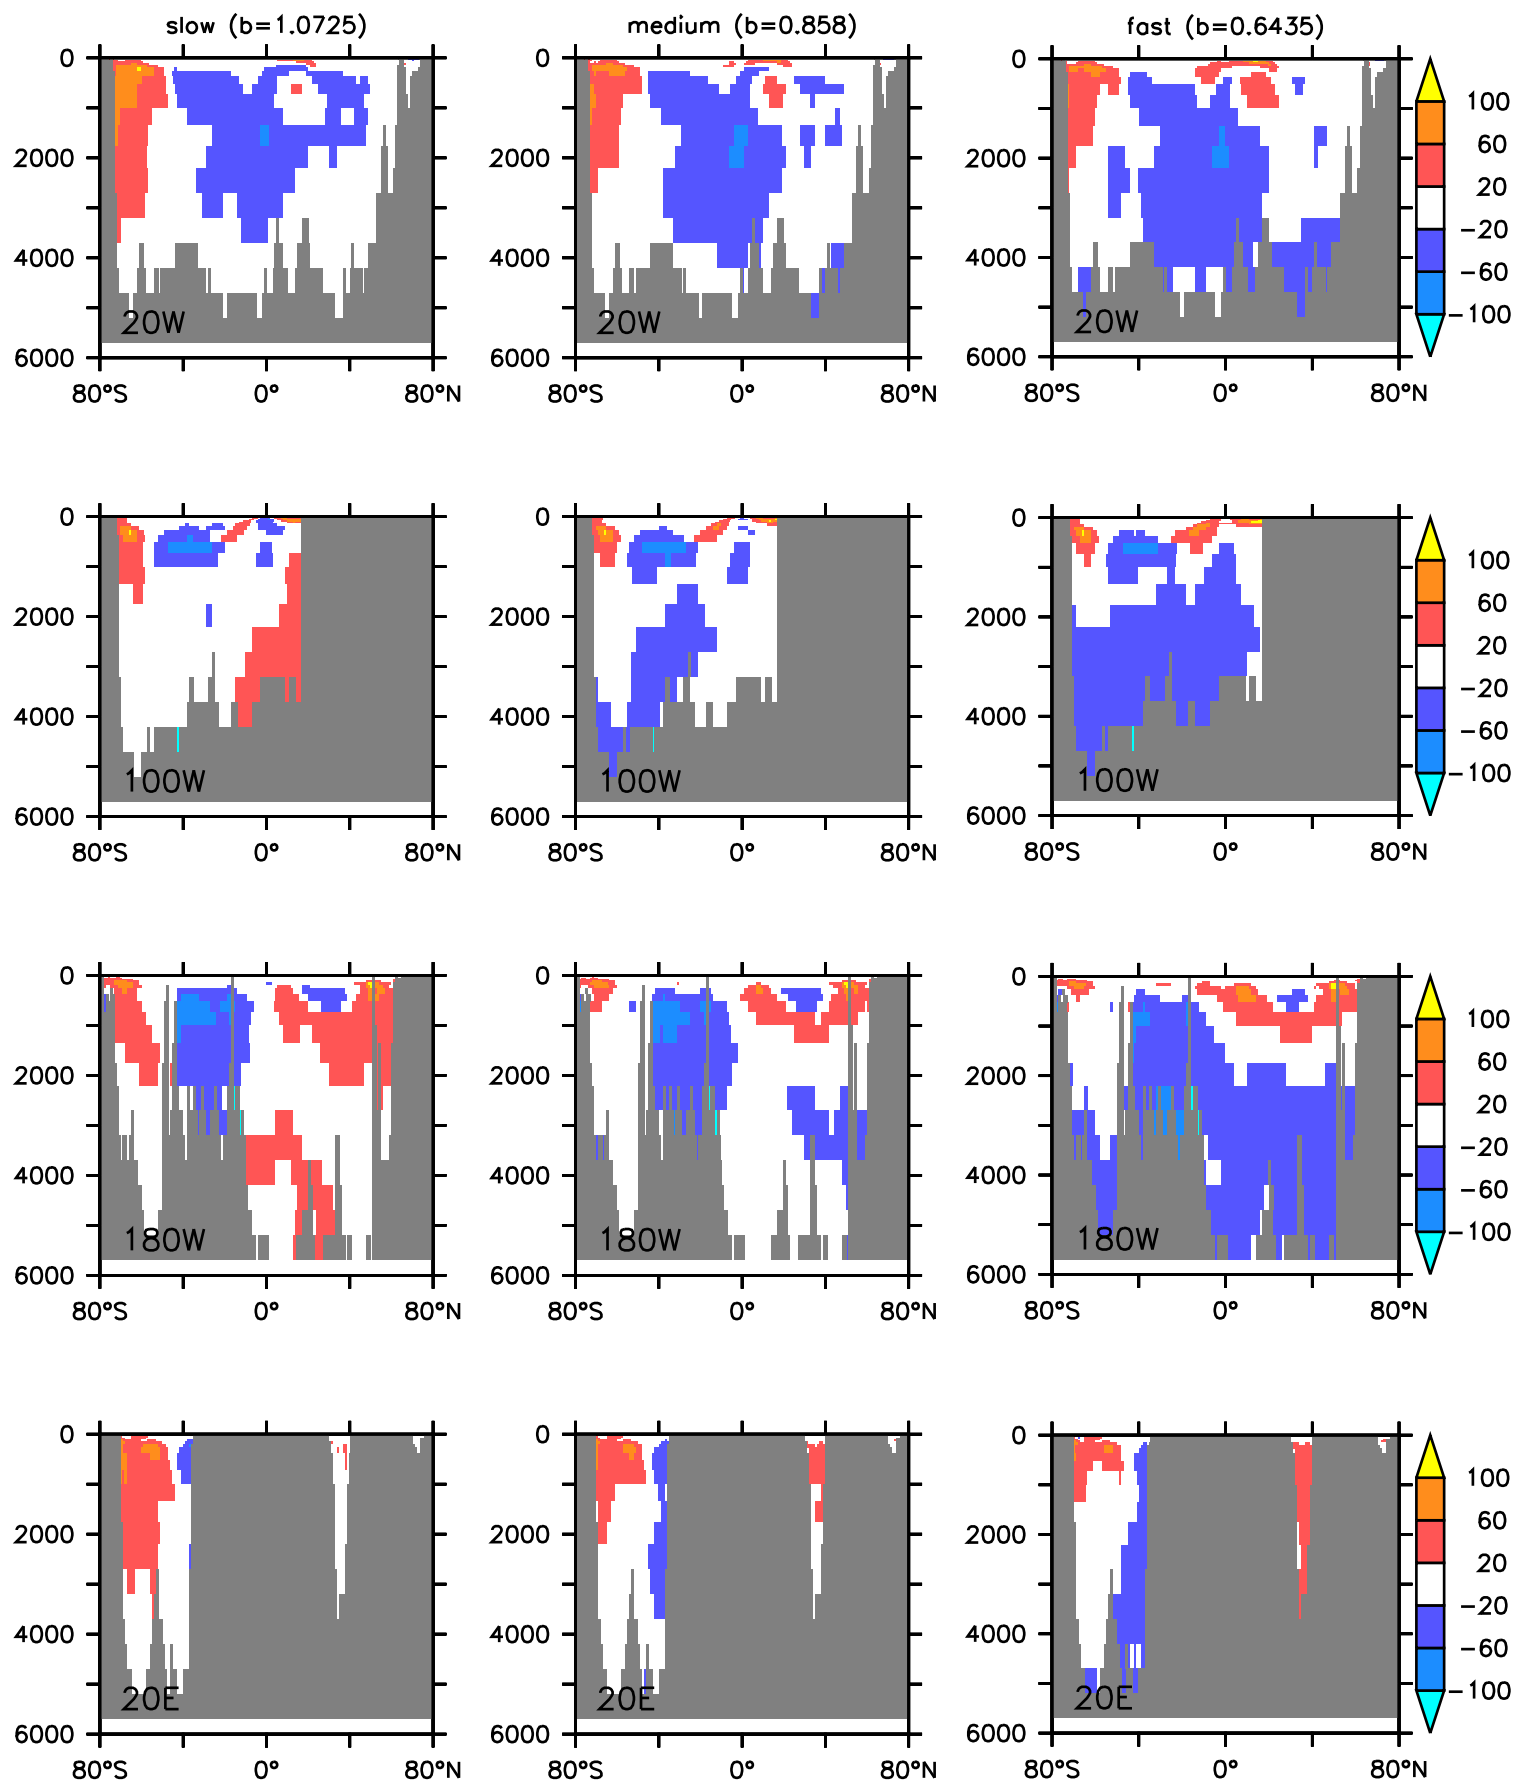

Supplement: Supplementary file 32 [file gmd-8-2929-2015-supplement.zip]

# NFixNoTemp, NO<sub>3</sub>, model – obs

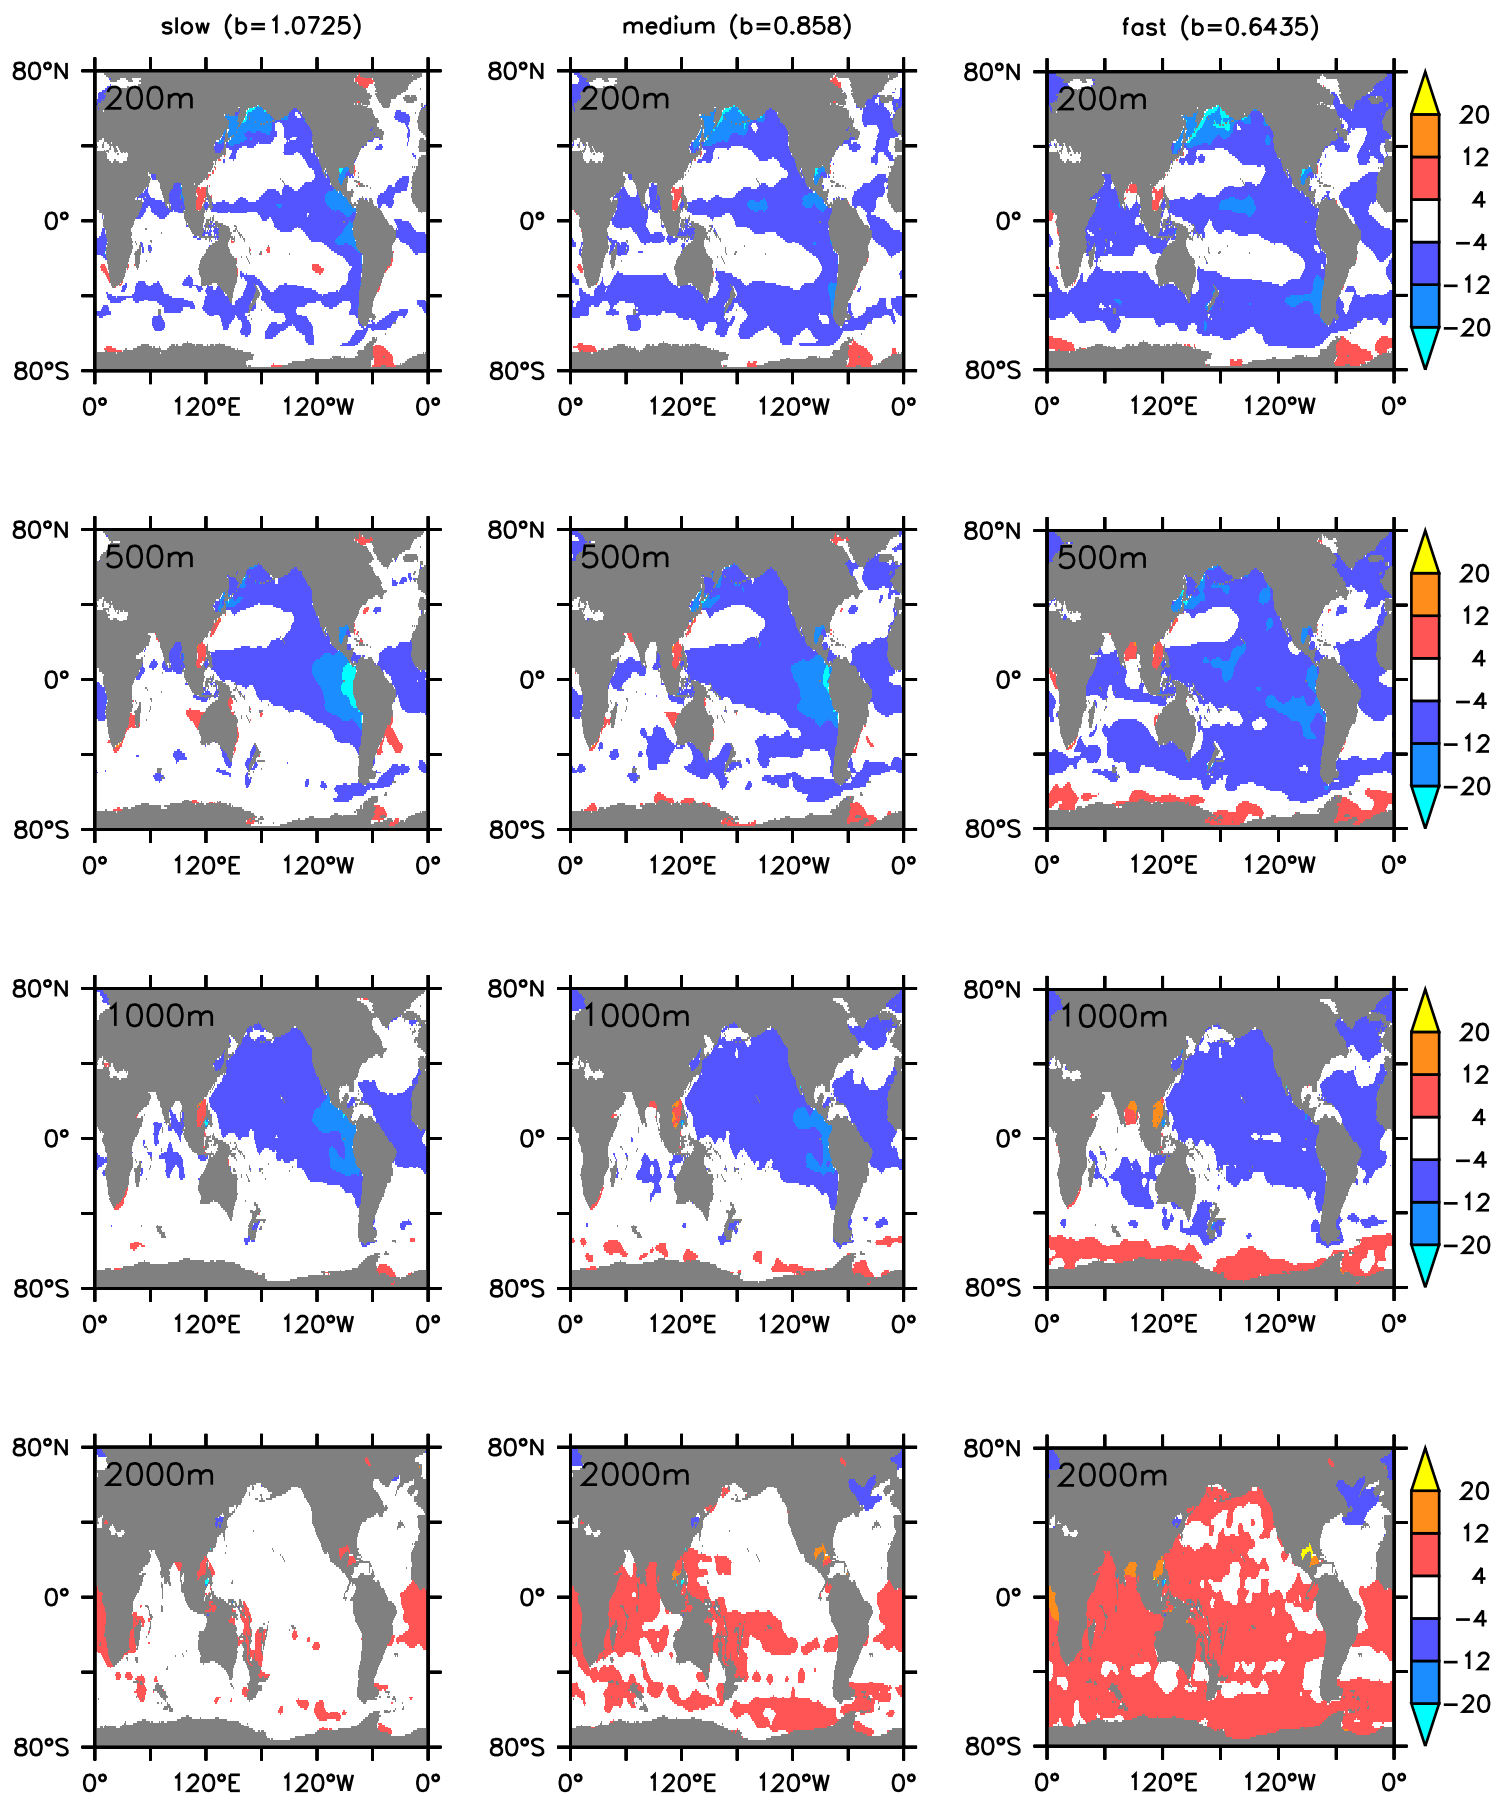

Supplement: Supplementary file 33 [file gmd-8-2929-2015-supplement.zip]

# NFixStoich, NO<sub>3</sub>, model – obs

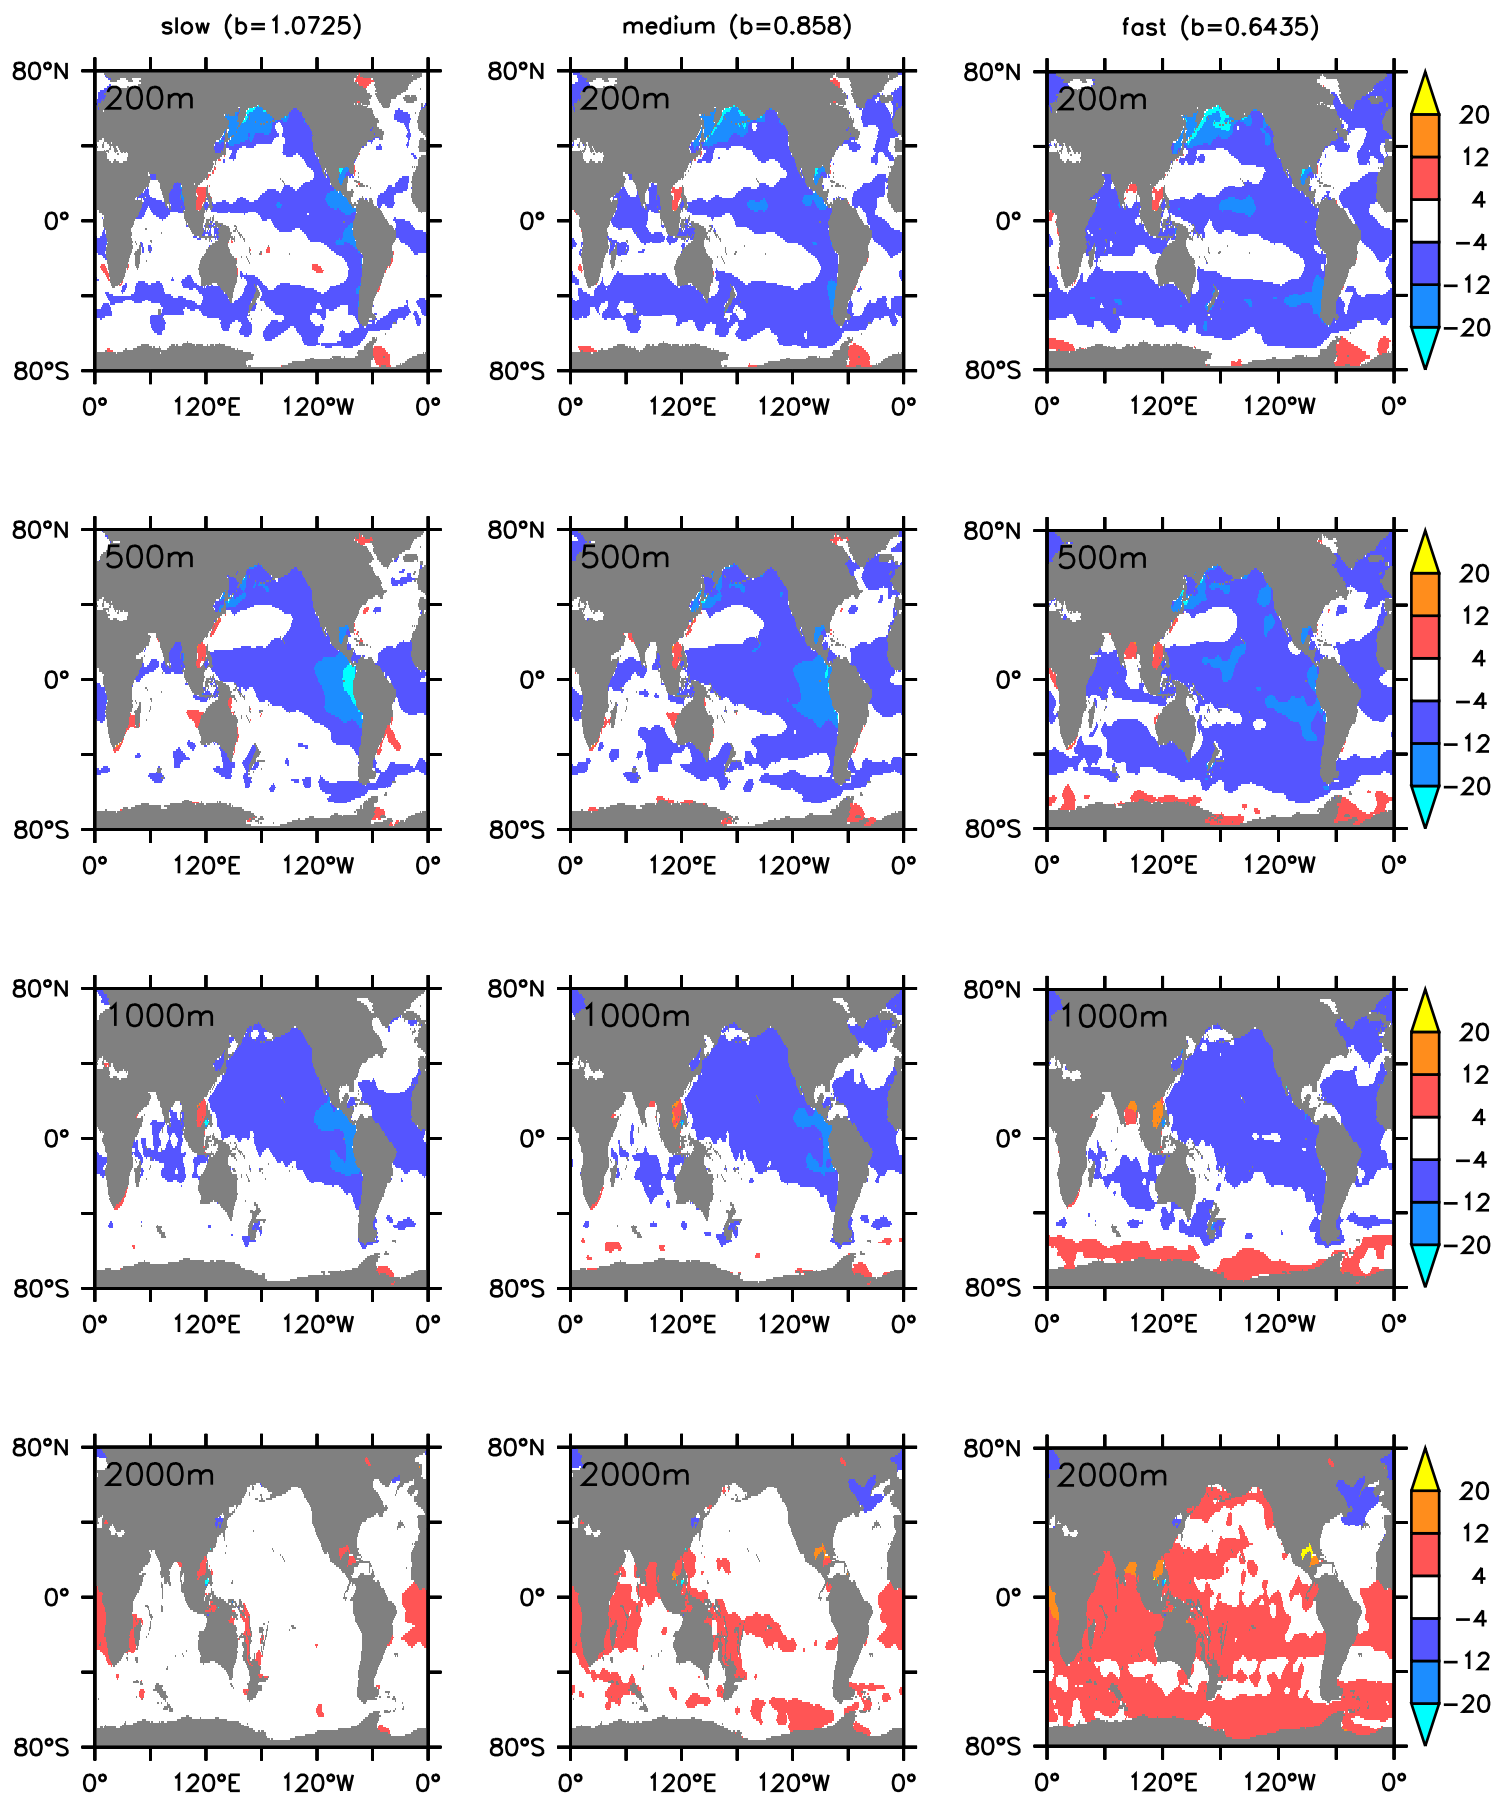

Supplement: Supplementary file 34 [file gmd-8-2929-2015-supplement.zip]

BASE, NO<sub>3</sub>, model – obs

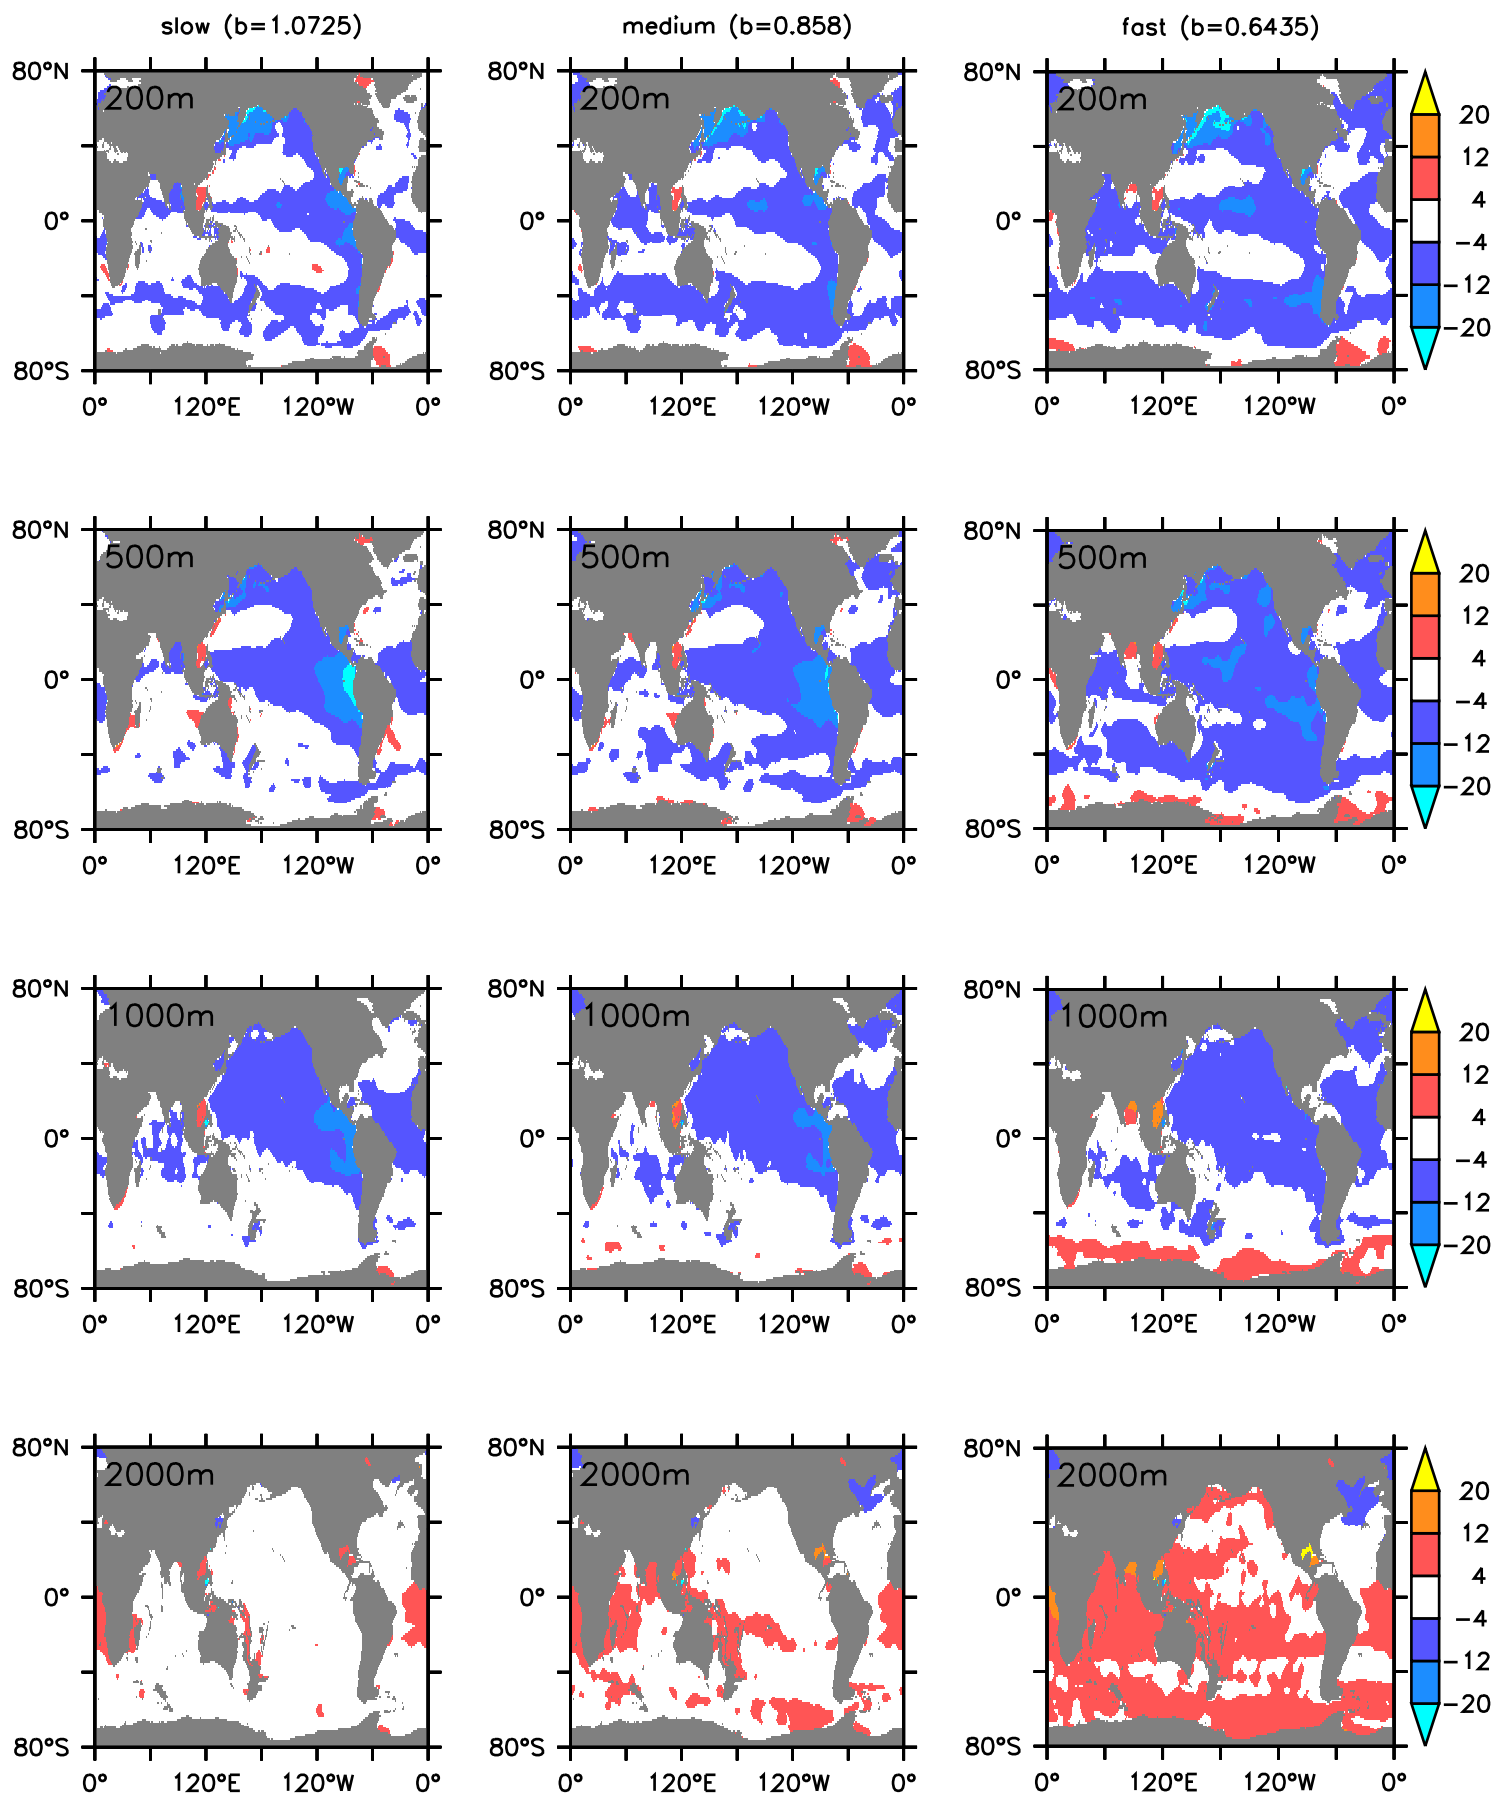

Supplement: Supplementary file 35 [file gmd-8-2929-2015-supplement.zip]

RemHigh, PO<sub>4</sub>, model - obs

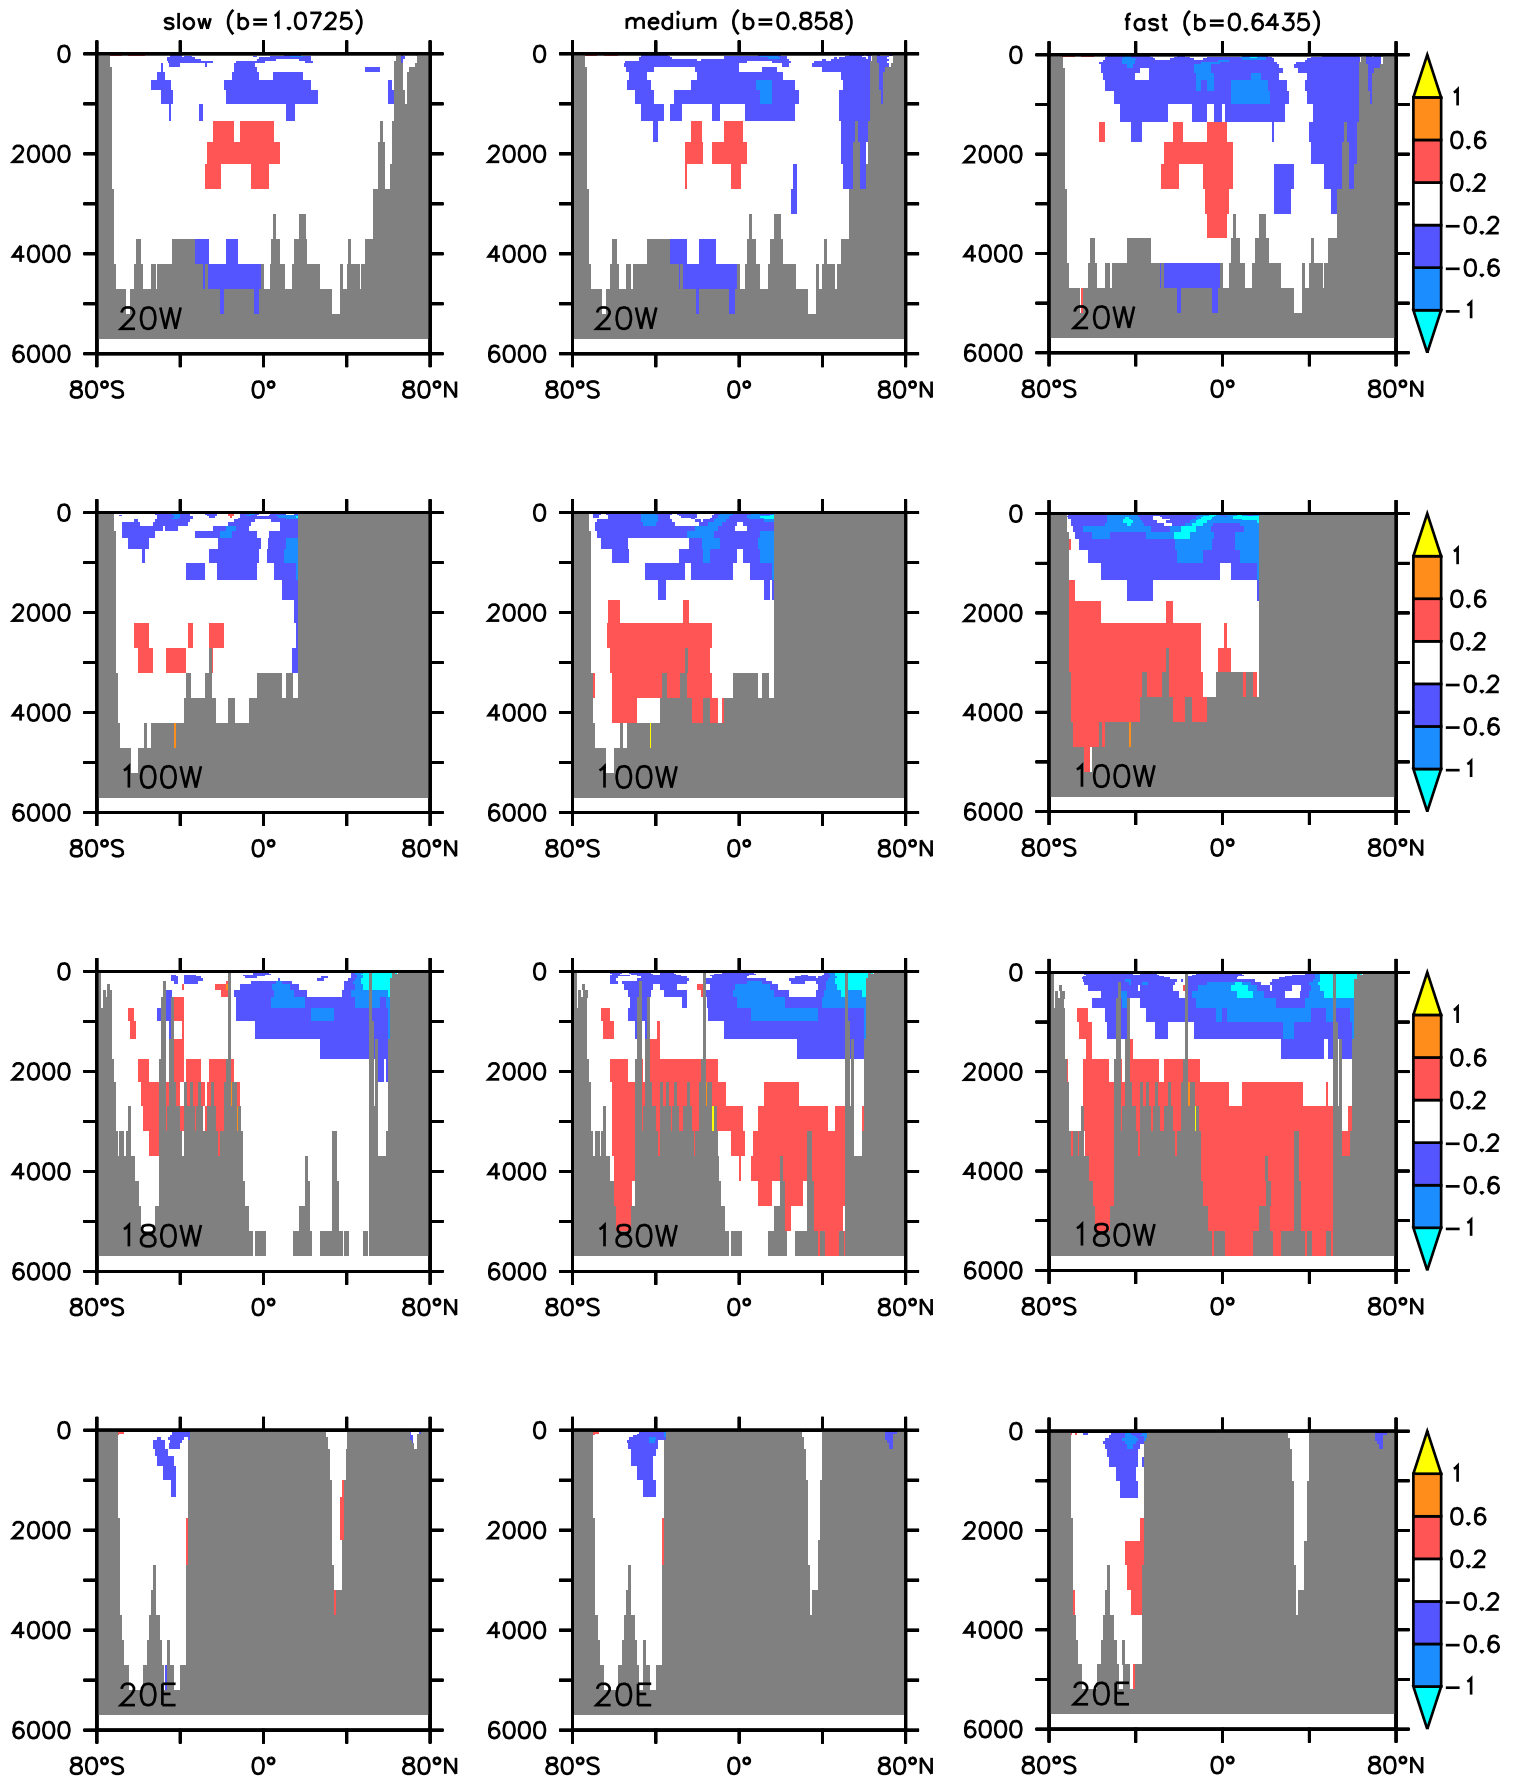

Supplement: Supplementary file 36 [file gmd-8-2929-2015-supplement.zip]
